# Supplementary material for: Unraveling the correlation between biological effects and halogen substituents in cobalt bis(dicarbollide)
Source: Royal Society of Chemistry journal article supplement (doi:10.1039/d4qi02296c), 2024-11-12
Supplement: d4qi02296c1.pdf [file d4qi02296c1.pdf]

## SUPPLEMENTARY INFORMATION

### Unraveling the the Correlation between Biological Effects and Halogen Substituents in Cobalt bis(dicarbollide)

Katarzyna Zakret-Drozdowska<sup>1</sup>, Bożena Szermer-Olearnik<sup>1</sup>, Waldemar Goldeman<sup>2</sup>,  
Michalina Gos<sup>1</sup>, Dawid Drozdowski<sup>3</sup>, Anna Gągor<sup>3</sup>, Tomasz M. Goszczyński<sup>1\*</sup>

<sup>1</sup> Laboratory of Biomedical Chemistry, Hirszfeld Institute of Immunology and Experimental Therapy, Polish Academy of Sciences, 53-114 Wrocław, Poland

<sup>2</sup> Department of Organic and Medicinal Chemistry, Faculty of Chemistry, Wrocław University of Science and Technology, 50-370 Wrocław, Poland

<sup>3</sup> Institute of Low Temperature and Structure Research, Polish Academy of Sciences, 50-422 Wrocław, Poland

\*Corresponding author: Tomasz M. Goszczyński, [gosczyński@hirszfeld.pl](mailto:gosczyński@hirszfeld.pl)

#### Table of contents

|                                                                                                            |    |
|------------------------------------------------------------------------------------------------------------|----|
| 1. Analytical data .....                                                                                   | 3  |
| 1.1. Characterization of [CoSAN-F <sub>2</sub> ] <sup>-</sup> .....                                        | 3  |
| 1.1.1. NMR spectra of [CoSAN-F <sub>2</sub> ] × 1-Chloromethyl-1,4-diazoniabicyclo[2.2.2]octane] salt .... | 5  |
| 1.1.2. NMR spectra of H[CoSAN-F <sub>2</sub> ] .....                                                       | 8  |
| 1.1.3. Characterization of H[CoSAN-F] – the major side product of H[CoSAN-F <sub>2</sub> ] synthesis.....  | 11 |
| 1.2. Characterization of [CoSAN-Cl <sub>2</sub> ] <sup>-</sup> .....                                       | 12 |
| 1.3. Characterization of [CoSAN-Br <sub>2</sub> ] <sup>-</sup> .....                                       | 16 |
| 1.4. Characterization of [CoSAN-I <sub>2</sub> ] <sup>-</sup> .....                                        | 20 |
| 1.5. Characterization of [CoSAN-Cl] <sup>-</sup> .....                                                     | 21 |
| 1.6. Characterization of [CoSAN-Br] <sup>-</sup> .....                                                     | 26 |
| 1.7. Characterization of [CoSAN-I] <sup>-</sup> .....                                                      | 31 |
| 1.8. Characterization of [CoSAN-Cl,Br] <sup>-</sup> .....                                                  | 32 |
| 1.10 Characterization of [CoSAN-I,Br] <sup>-</sup> .....                                                   | 37 |
| 1.11 Characterization of [CoSAN-I,Cl] <sup>-</sup> .....                                                   | 42 |
| 2. Single Crystal X-Ray Diffraction Data.....                                                              | 49 |
| 3. Summary of biological and physicochemical data .....                                                    | 53 |
| 4. Antiproliferative activity.....                                                                         | 55 |
| 4.1 IC <sub>50</sub> comparison for tested cell lines.....                                                 | 55 |
| 4.2 Dose-response curve for Na[CoSAN] .....                                                                | 56 |
| 4.3 Dose-response curve for Na[CoSAN-F <sub>2</sub> ].....                                                 | 57 |
| 4.4 Dose-response curve for Na[CoSAN-Cl <sub>2</sub> ] .....                                               | 58 |
| 4.5 Dose-response curve for Na[CoSAN-Br <sub>2</sub> ].....                                                | 59 |

|      |                                                              |    |
|------|--------------------------------------------------------------|----|
| 4.6  | Dose-response curve for <b>Na[CoSAN-I<sub>2</sub>]</b> ..... | 60 |
| 4.7  | Dose-response curve for <b>Na[CoSAN-Cl]</b> .....            | 61 |
| 4.8  | Dose-response curve for <b>Na[CoSAN-Br]</b> .....            | 62 |
| 4.9  | Dose-response curve for <b>Na[CoSAN-I]</b> .....             | 63 |
| 4.10 | Dose-response curve for <b>Na[CoSAN-Cl,Br]</b> .....         | 64 |
| 4.11 | Dose-response curve for <b>Na[CoSAN-I,Br]</b> .....          | 65 |
| 4.12 | Dose-response curve for <b>Na[CoSAN-I,Cl]</b> .....          | 66 |

# 1. Analytical data

## 1.1. Characterization of [CoSAN-F<sub>2</sub>]<sup>-</sup>

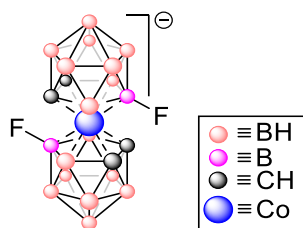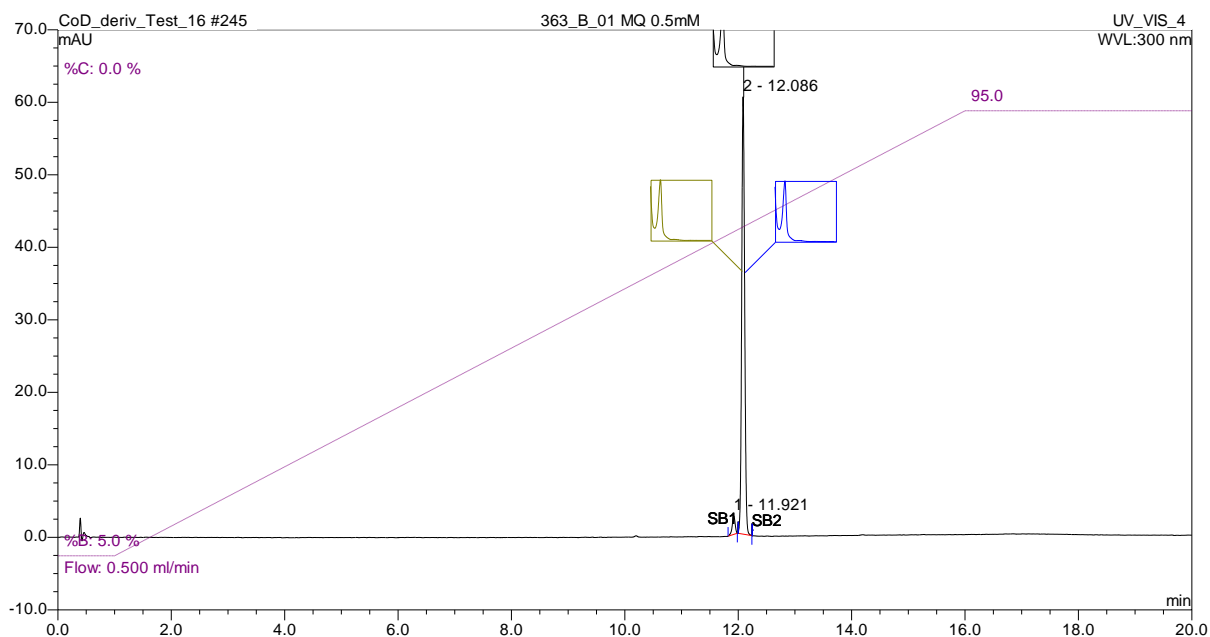

Fig. S1. HPLC chromatogram of [CoSAN-F<sub>2</sub>]<sup>-</sup>. Purity – 96.03%

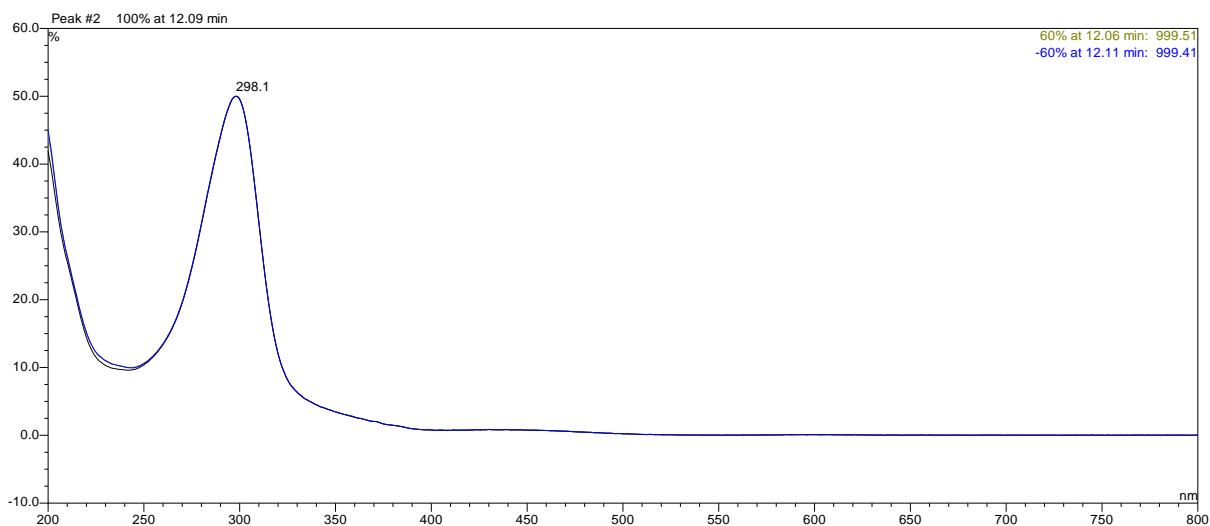

Fig. S2. UV-VIS spectrum of [CoSAN-F<sub>2</sub>]<sup>-</sup> (peak purity analysis).

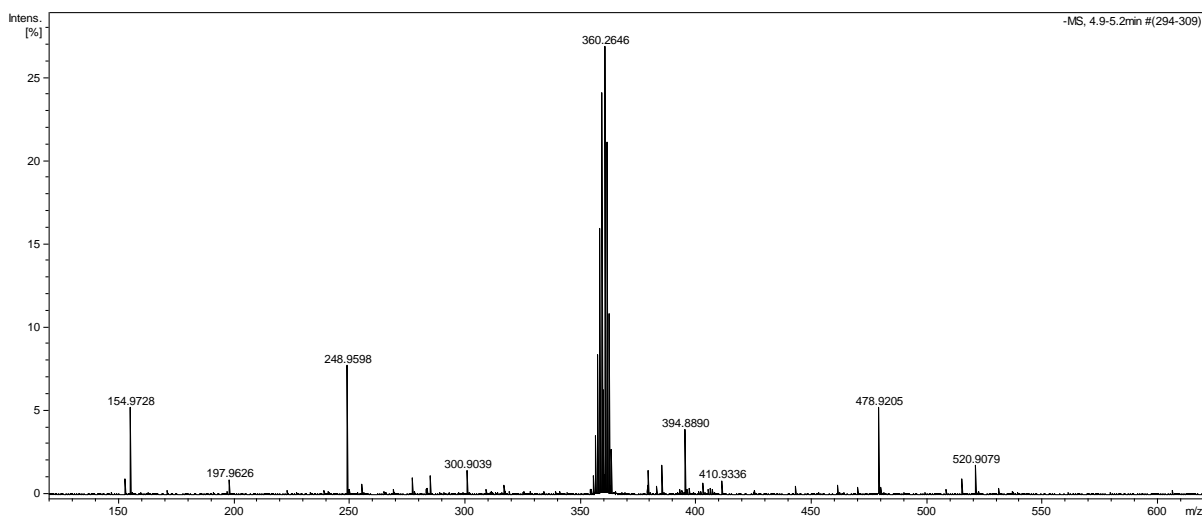

Fig. S3. ESI-MS spectrum of  $[\text{CoSAN-F}_2]$ .

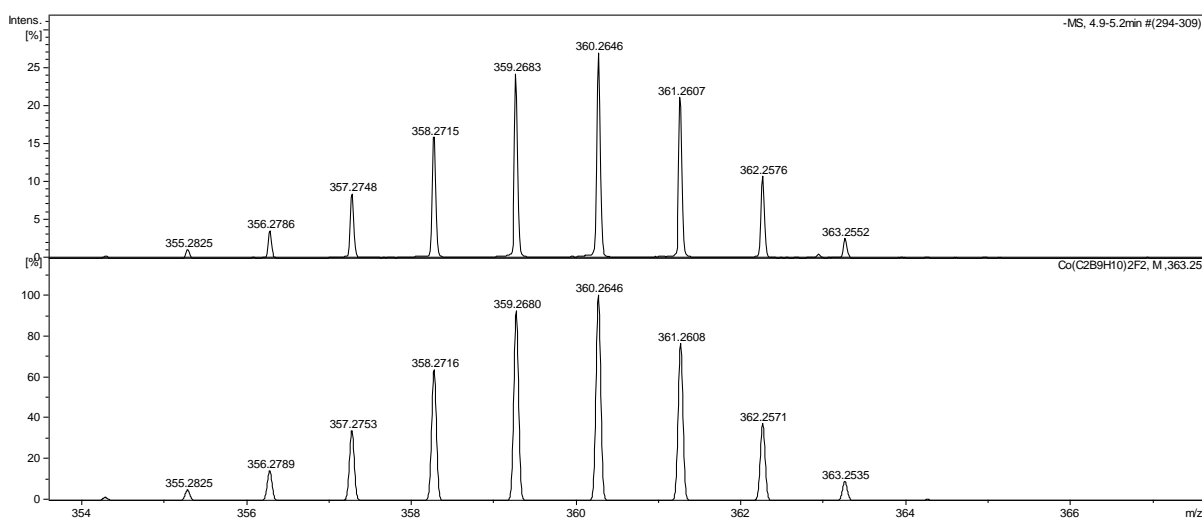

Fig. S4. Measured (top) and simulated (bottom) ESI-MS spectrum of  $[\text{CoSAN-F}_2]$  – isotope pattern.

### 1.1.1. NMR spectra of $[\text{CoSAN-F}_2] \times 1\text{-Chloromethyl-1,4-diazoniabicyclo[2.2.2]octane}$ salt

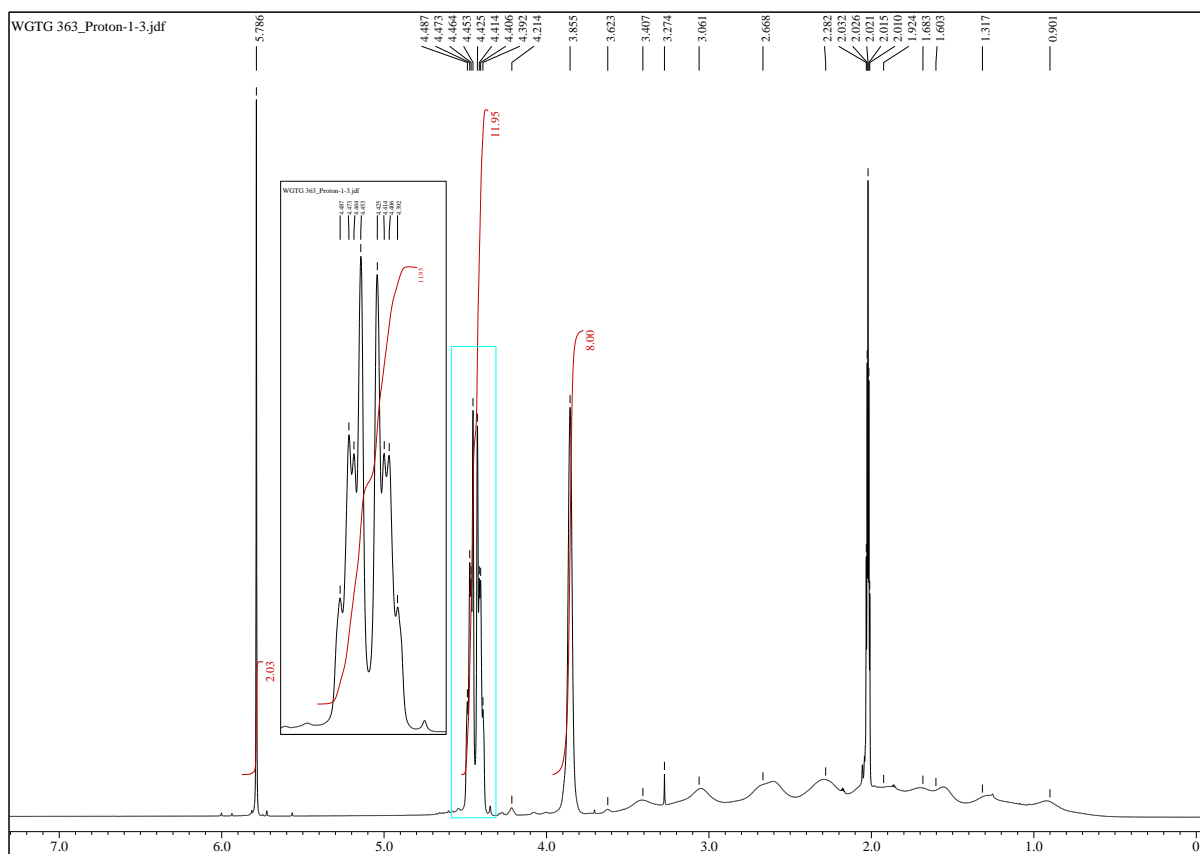

Fig. S5.  $^1\text{H}$  NMR spectrum of  $[\text{CoSAN-F}_2] \times 1\text{-Chloromethyl-1,4-diazoniabicyclo[2.2.2]octane}$  salt in acetone- $\text{d}_6$  (400 MHz).

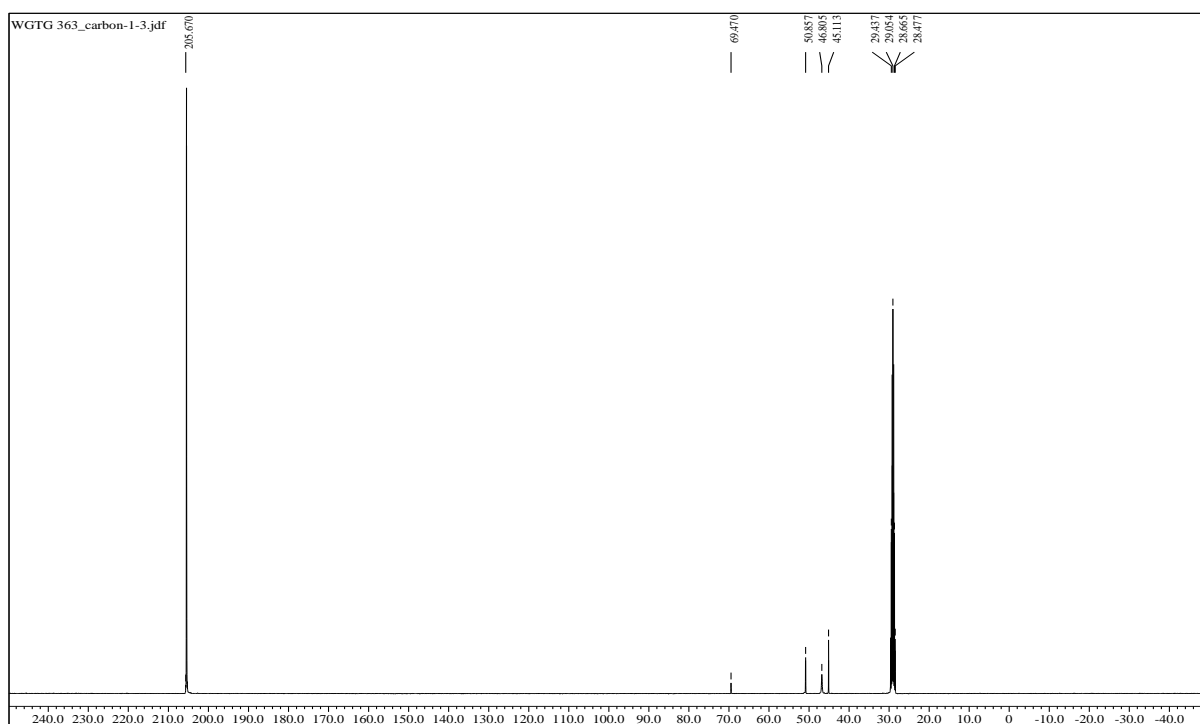

Fig. S6.  $^{13}\text{C}\{^1\text{H}\}$  NMR spectrum of  $[\text{CoSAN-F}_2] \times 1\text{-Chloromethyl-1,4-diazoniabicyclo[2.2.2]octane}$  salt in acetone- $\text{d}_6$  (100 MHz).

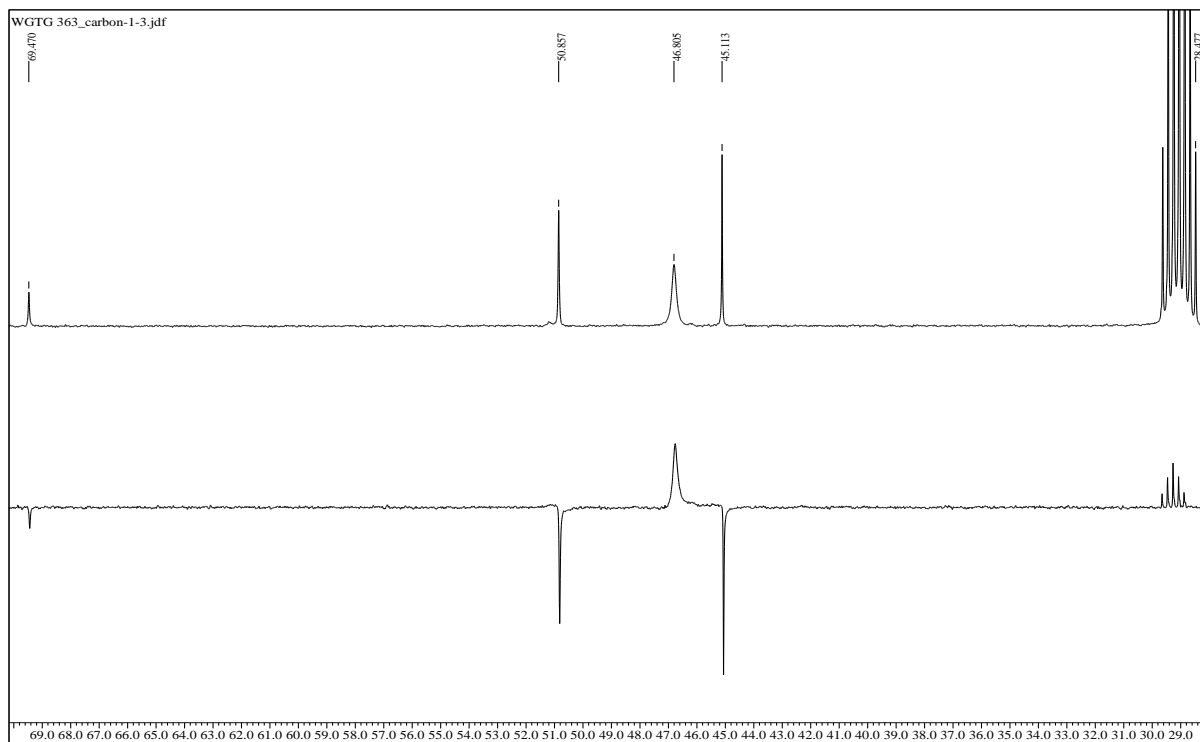

Fig. S7. Expanded  $^{13}\text{C}\{^1\text{H}\}$  NMR (top) and DEPT 135 (bottom) spectra of  $[[\text{CoSAN-F}_2] \times 1\text{-Chloromethyl-1,4-diazoniabicyclo[2.2.2]octane}]$  salt in acetone- $d_6$  (100 MHz).

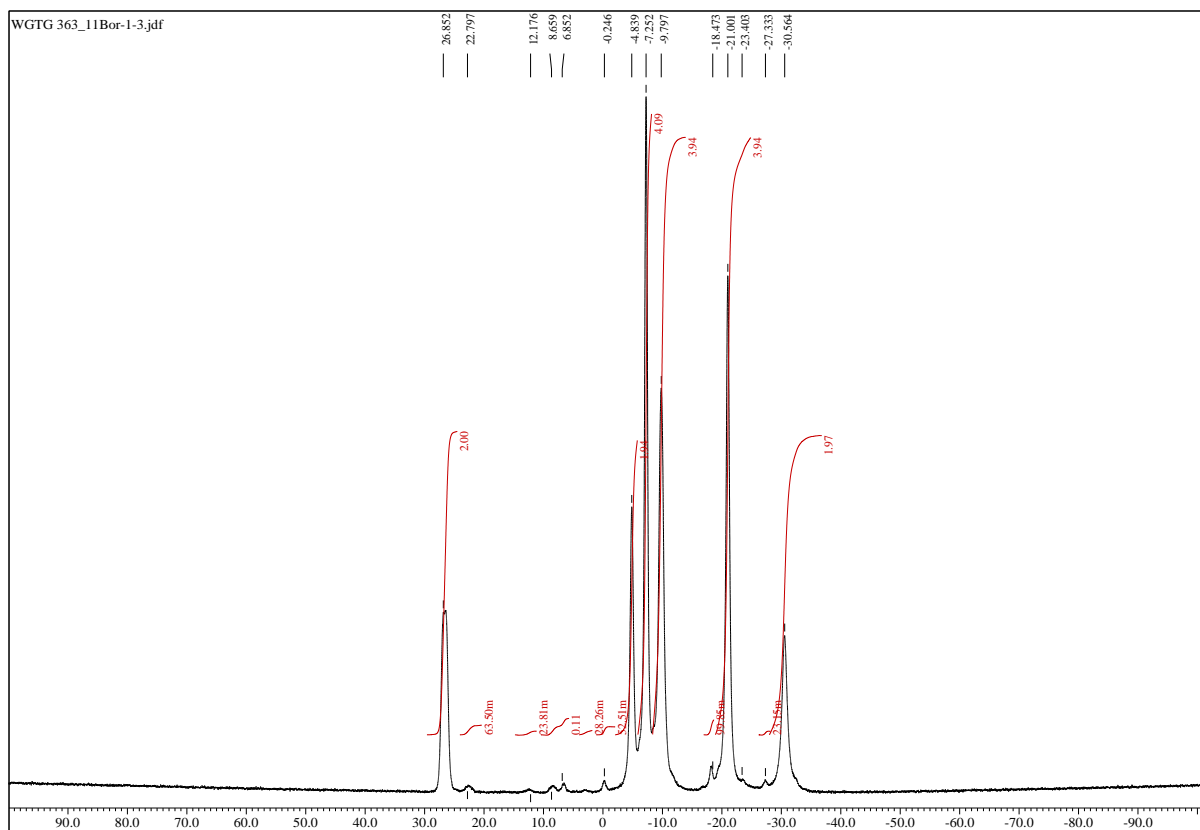

Fig. S8.  $^{11}\text{B}\{^1\text{H}\}$  NMR spectrum of  $[[\text{CoSAN-F}_2] \times 1\text{-Chloromethyl-1,4-diazoniabicyclo[2.2.2]octane}]$  salt in acetone- $d_6$  (128 MHz).

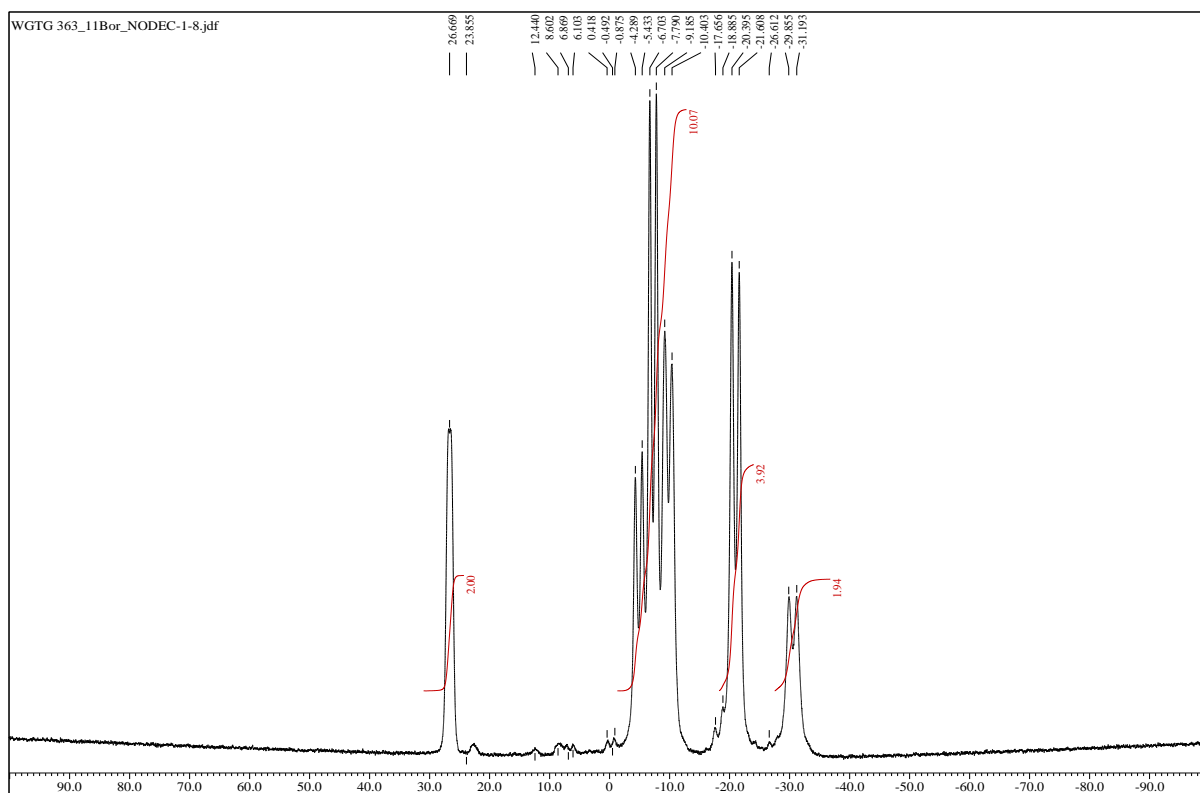

Fig. S9.  $^{11}\text{B}$  NMR spectrum of  $[[\text{CoSAN-F}_2] \times 1\text{-Chloromethyl-1,4-diazoniabicyclo}[2.2.2]\text{octane}]$  salt in acetone- $\text{d}_6$  (128 MHz).

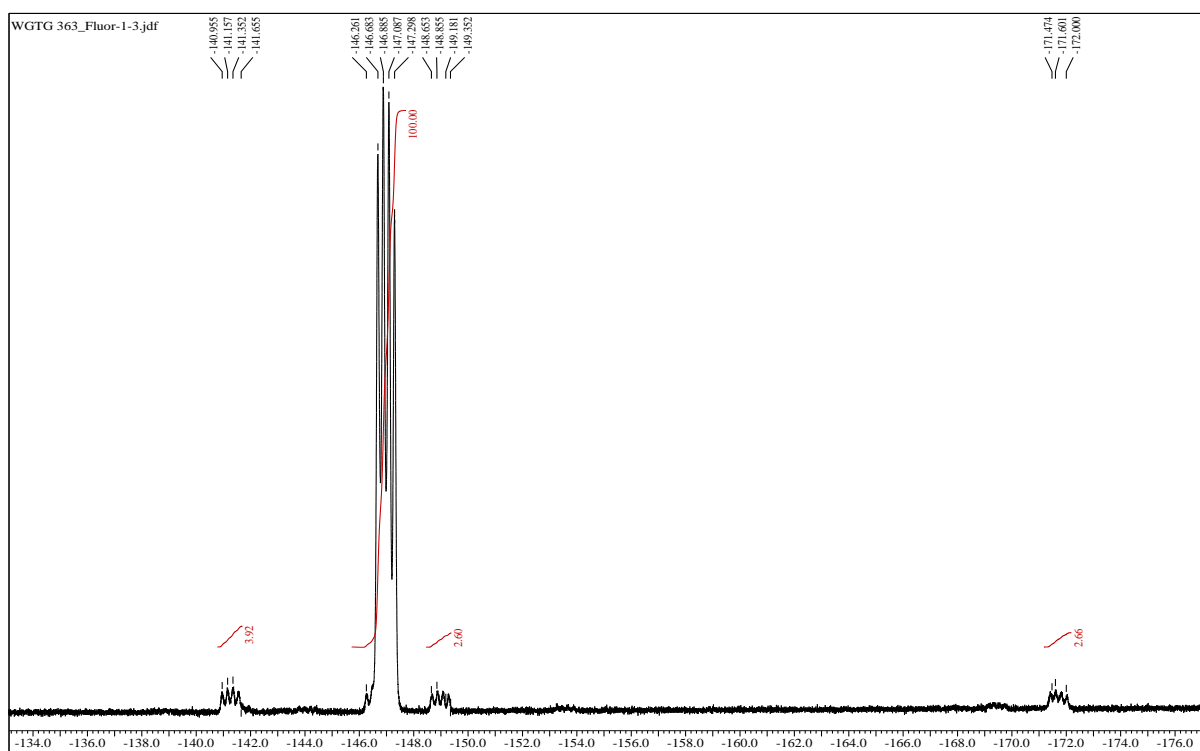

Fig. S10.  $^{19}\text{F}$  NMR spectrum of  $[[\text{CoSAN-F}_2] \times 1\text{-Chloromethyl-1,4-diazoniabicyclo}[2.2.2]\text{octane}]$  salt in acetone- $\text{d}_6$  (376 MHz).

### 1.1.2. NMR spectra of H[CoSAN-F<sub>2</sub>]

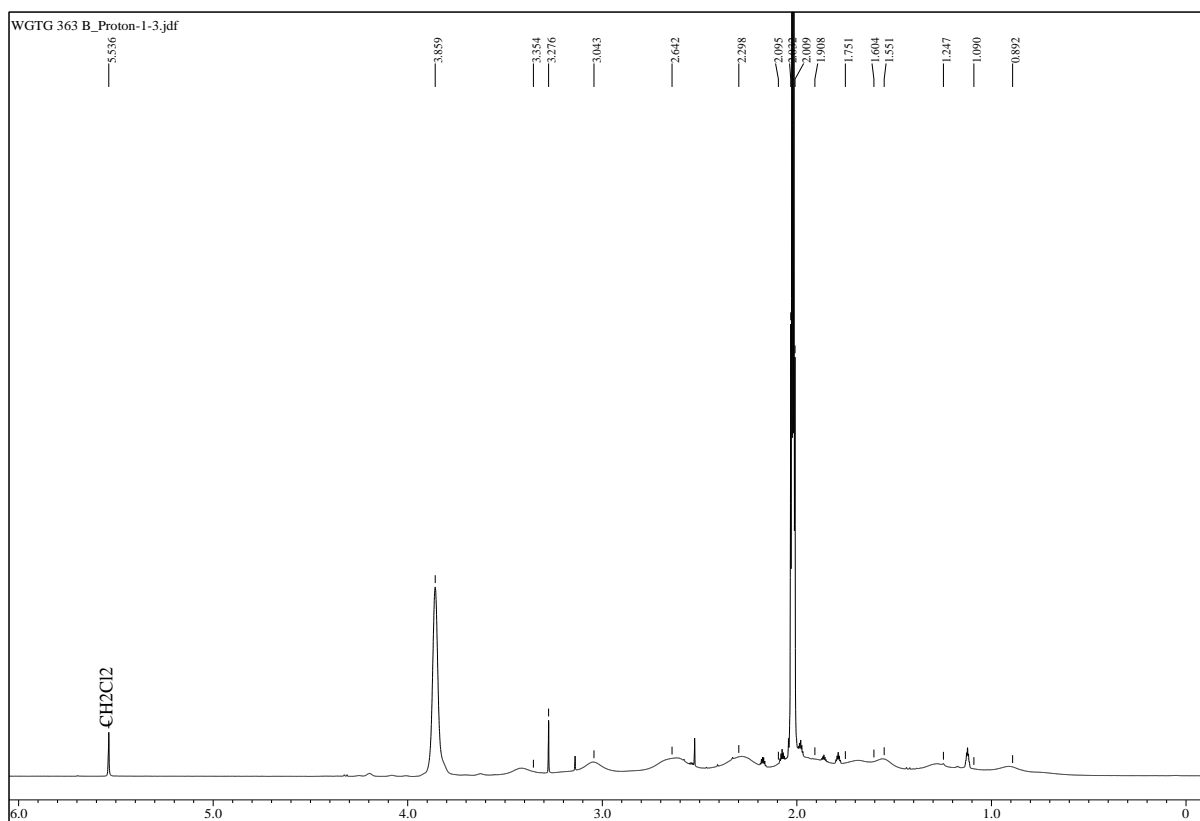

Fig. S11. <sup>1</sup>H NMR spectrum of H[CoSAN-F<sub>2</sub>] in acetone-d<sub>6</sub> (400 MHz).

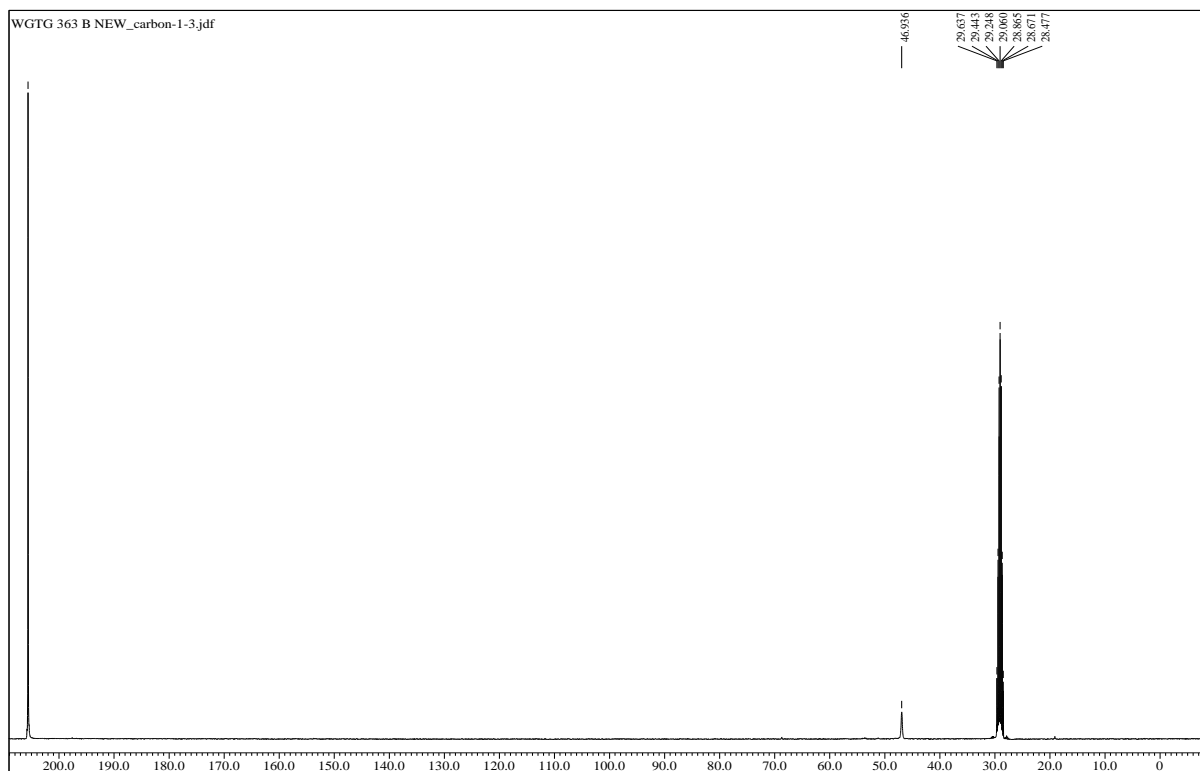

Fig. S12. <sup>13</sup>C{<sup>1</sup>H} NMR spectrum of H[CoSAN-F<sub>2</sub>] in acetone-d<sub>6</sub> (100 MHz).



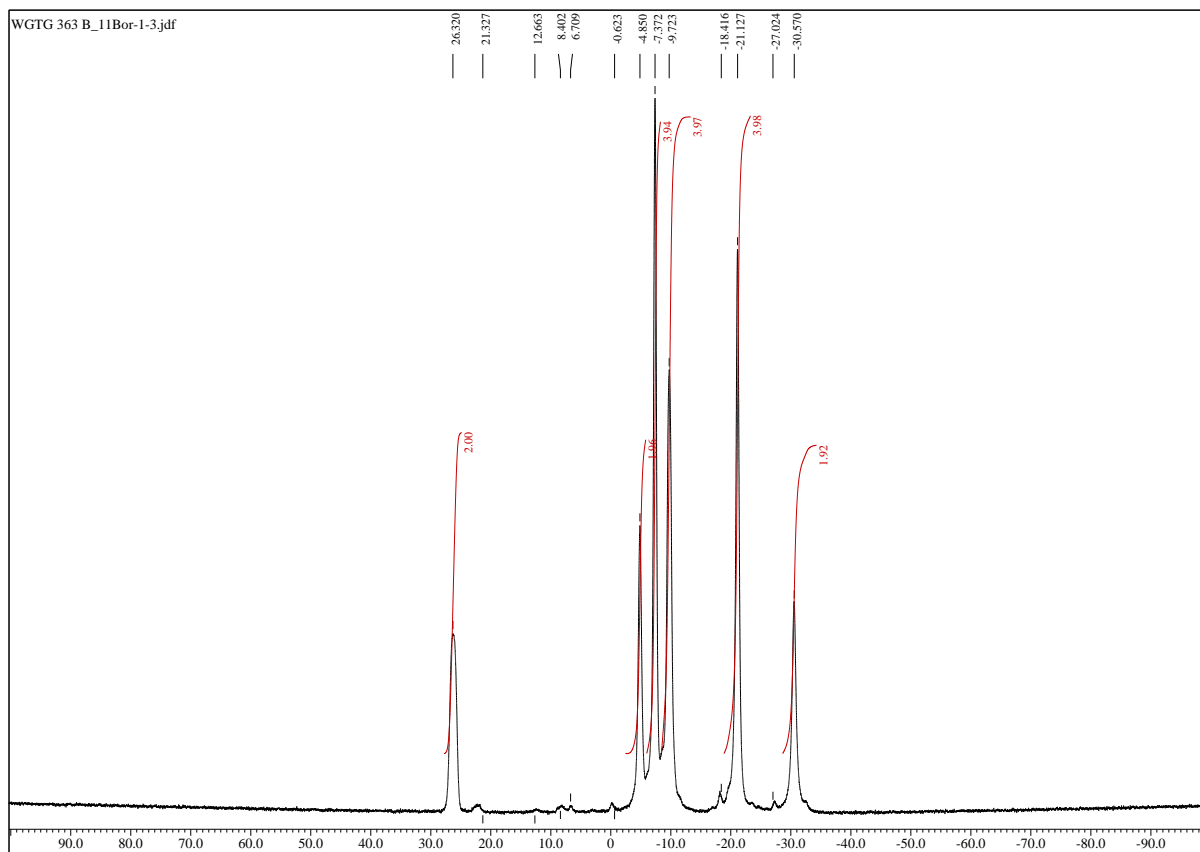

Fig. S13.  $^{11}\text{B}\{^1\text{H}\}$  NMR spectrum of  $\text{H}[\text{CoSAN-F}_2]$  in acetone- $d_6$  (128 MHz).

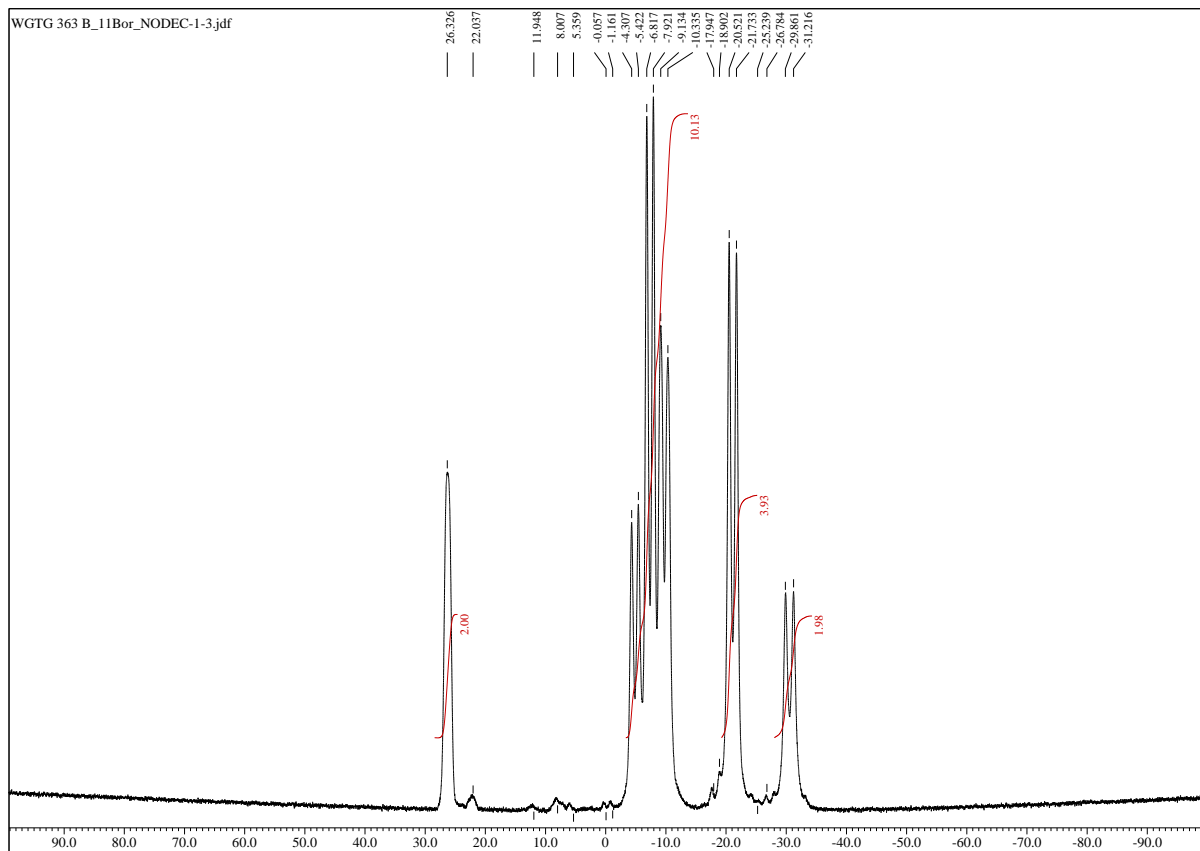

Fig. S14.  $^{11}\text{B}$  NMR spectrum of  $\text{H}[\text{CoSAN-F}_2]$  in acetone- $d_6$  (128 MHz).

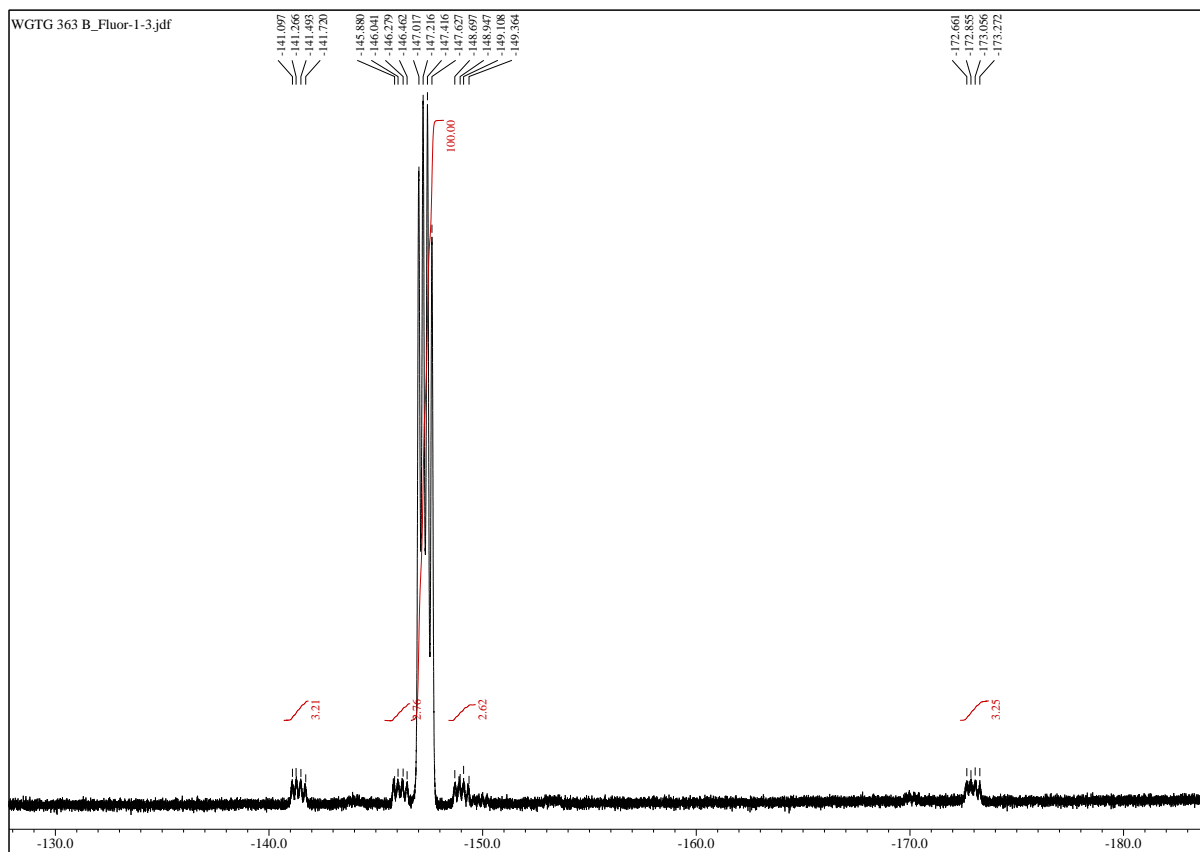

Fig. S15.  $^{19}\text{F}$  NMR spectrum of  $\text{H}[\text{CoSAN-F}_2]$  in acetone- $\text{d}_6$  (376 MHz).

### 1.1.3.Characterization of **H[CoSAN-F]** – the major side product of **H[CoSAN-F<sub>2</sub>]** synthesis

Mass spectra of the major side product - H[CoSAN-F]). Retention time of 11.91 min. (3.97%) on the full gradient chromatogram (Fig. S1)

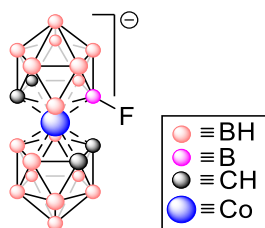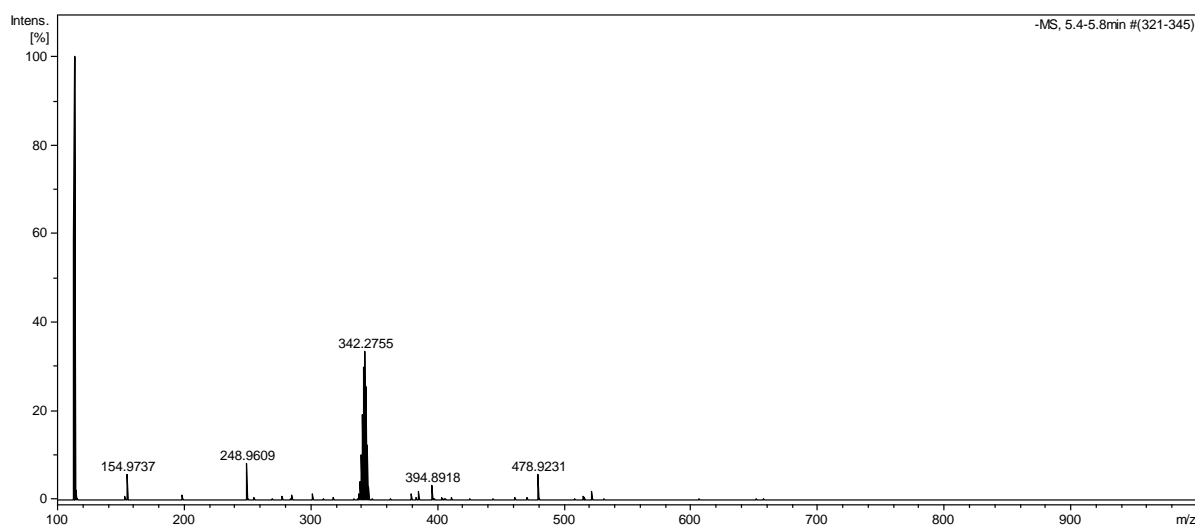

Fig. S16. ESI-MS spectrum of H[CoSAN-F].

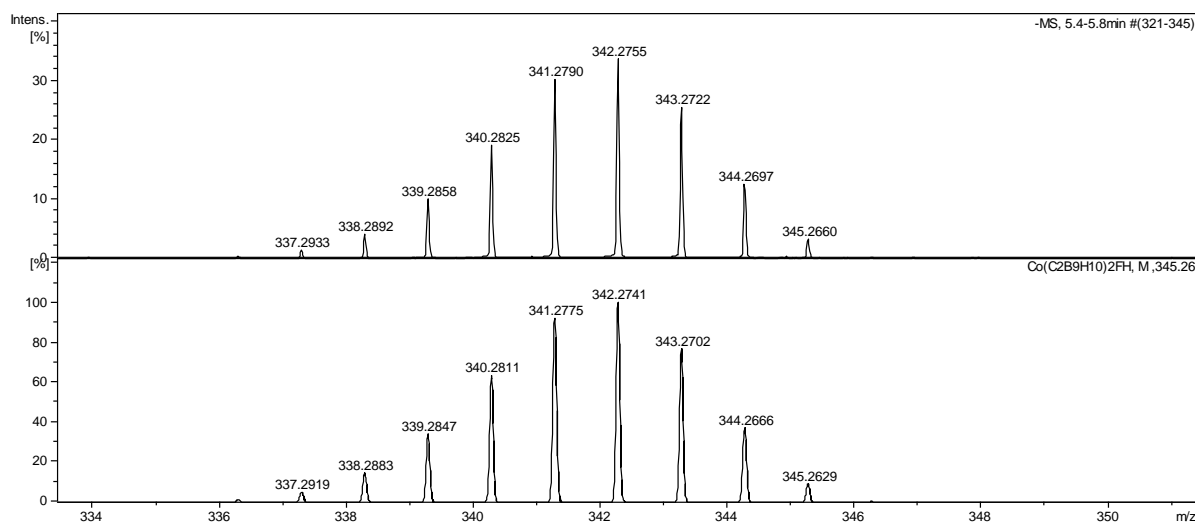

Fig. S17. Measured (top) and simulated (bottom) ESI-MS spectrum of H[CoSAN-F] – isotope pattern.

## 1.2. Characterization of $[\text{CoSAN-Cl}_2]^-$

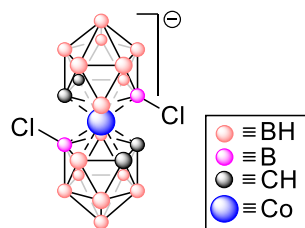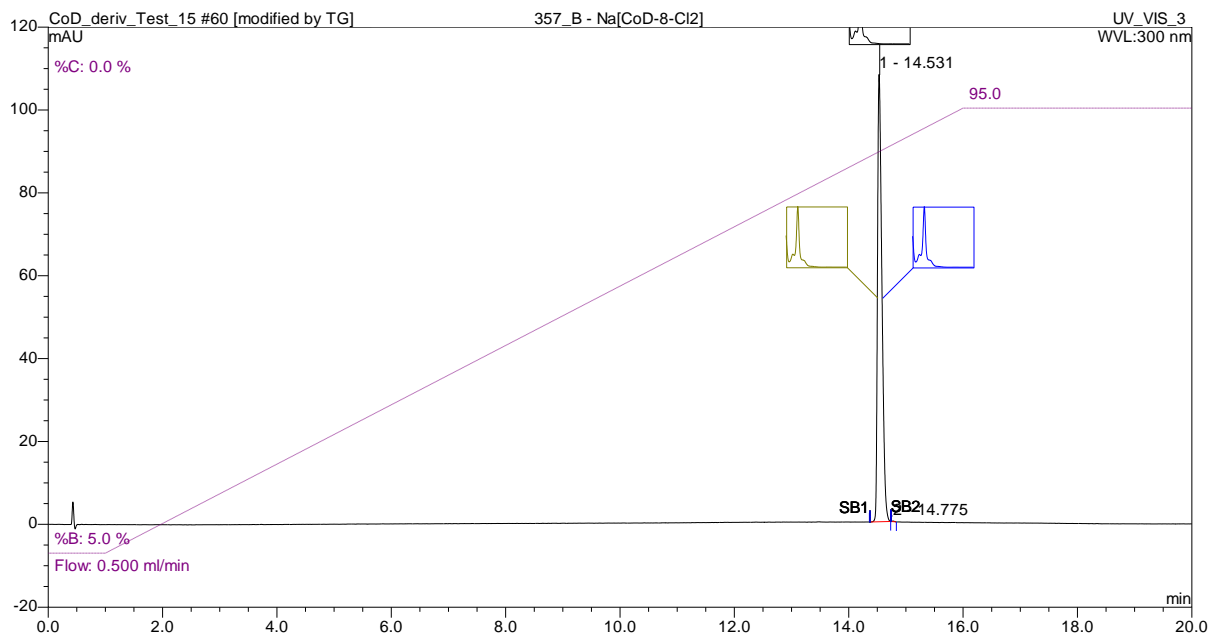

Fig. S18. HPLC chromatogram of  $[\text{CoSAN-Cl}_2]^-$ . Purity – 99.93%

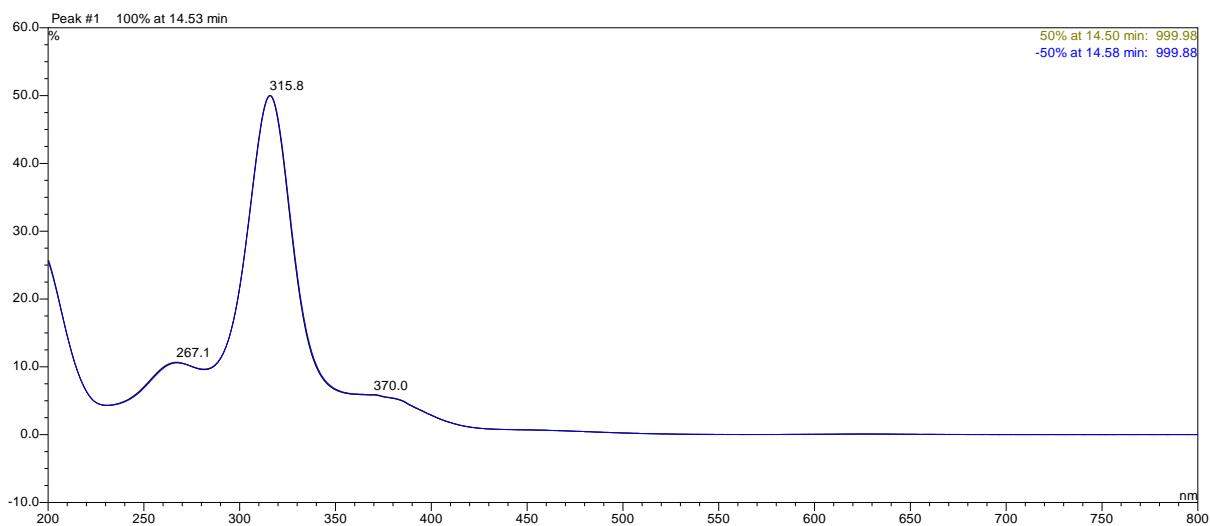

Fig. S19. UV-VIS spectrum of  $[\text{CoSAN-Cl}_2]^-$  (peak purity analysis).

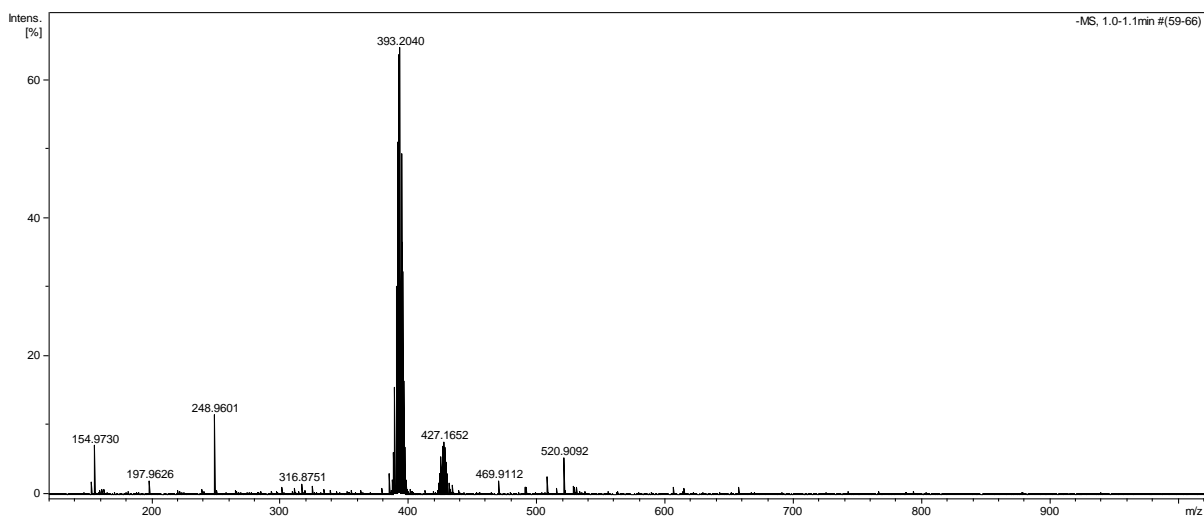

Fig. S20. ESI-MS spectrum of  $[\text{CoSAN-Cl}_2]^-$ .

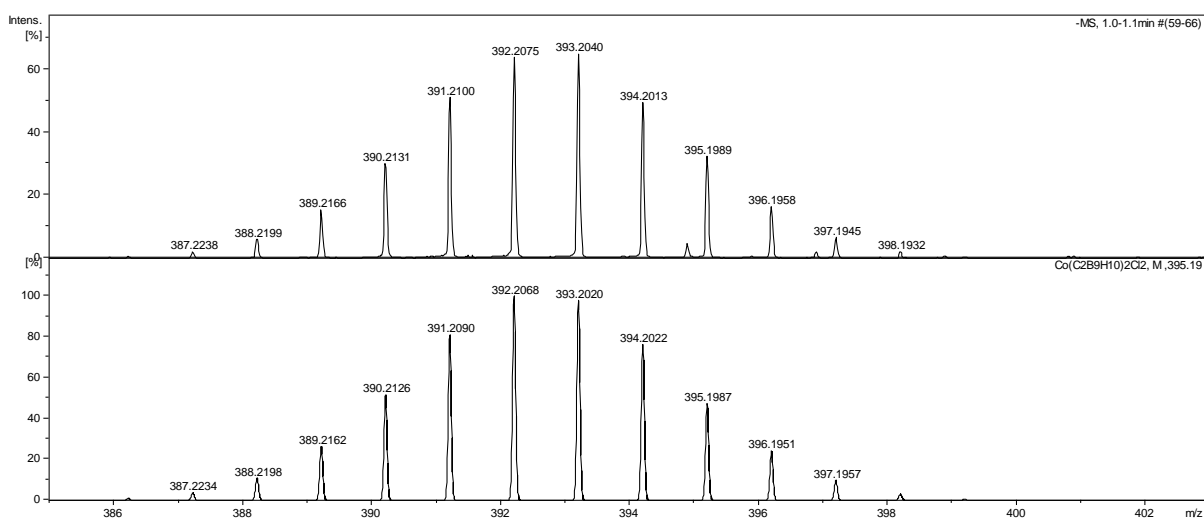

Fig. S21. Measured (top) and simulated (bottom) ESI-MS spectrum of  $[\text{CoSAN-Cl}_2]^-$  – isotope pattern.

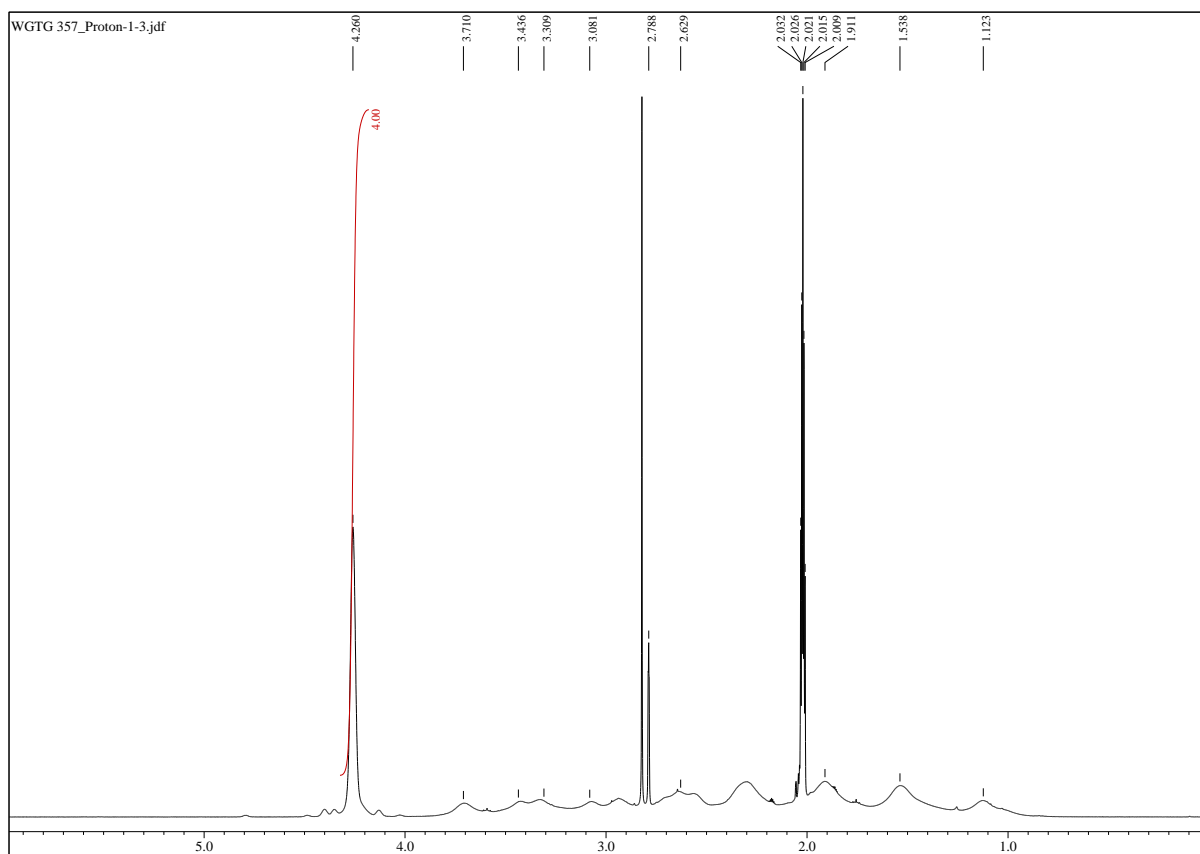

Fig. S22.  $^1\text{H}$  NMR spectrum of  $\text{Cs}[\text{CoSAN-Cl}_2]$  in acetone- $d_6$  (400 MHz).

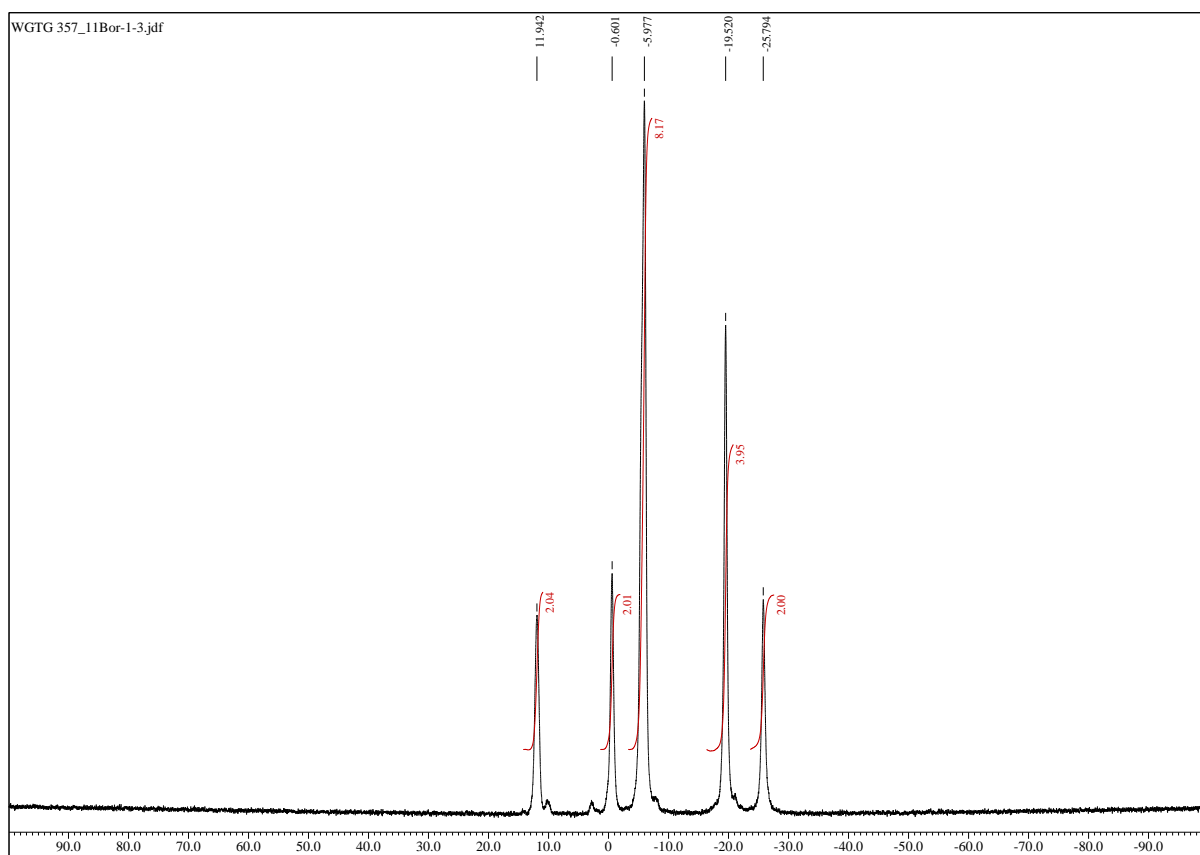

Fig. S23.  $^{11}\text{B}\{^1\text{H}\}$  NMR spectrum of  $\text{Cs}[\text{CoSAN-Cl}_2]$  in acetone- $d_6$  (128 MHz).

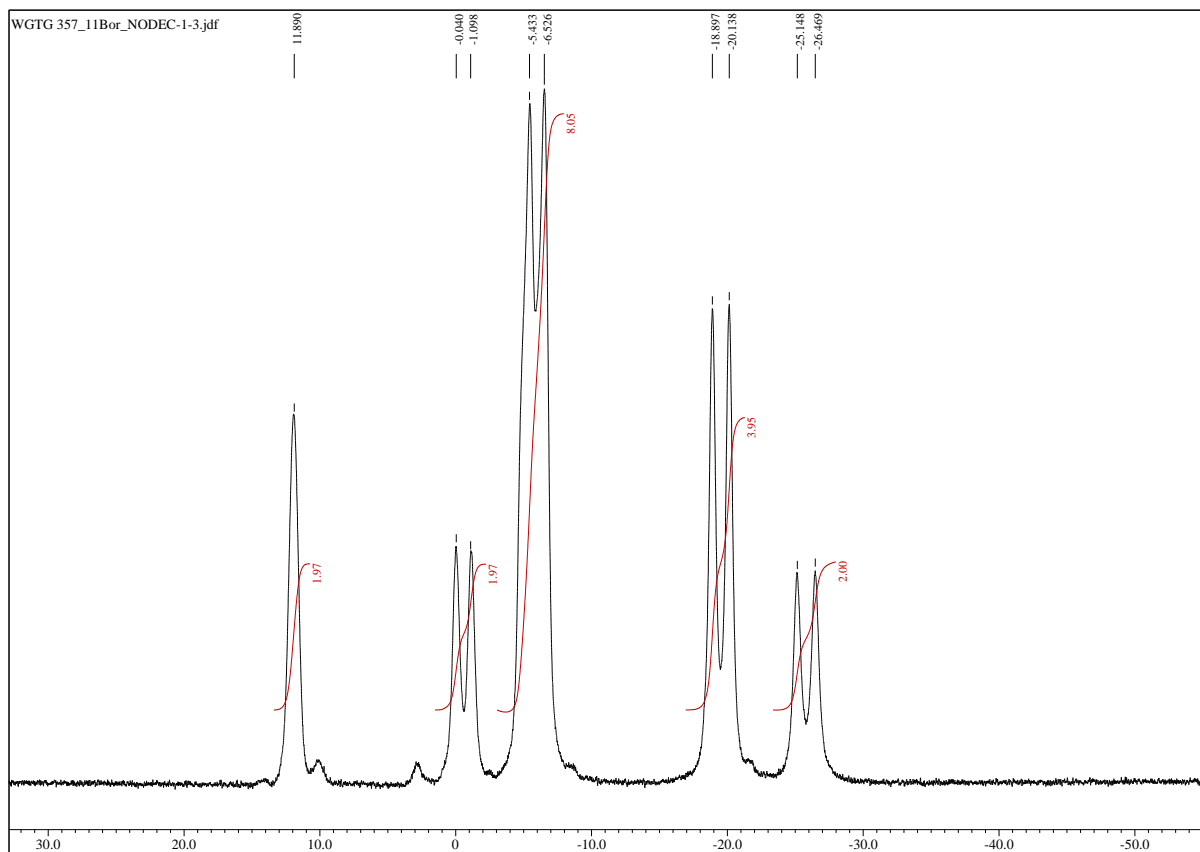

Fig. S24.  $^{11}\text{B}$  NMR spectrum of  $\text{Cs}[\text{CoSAN-Cl}_2]$  in acetone- $d_6$  (128 MHz).

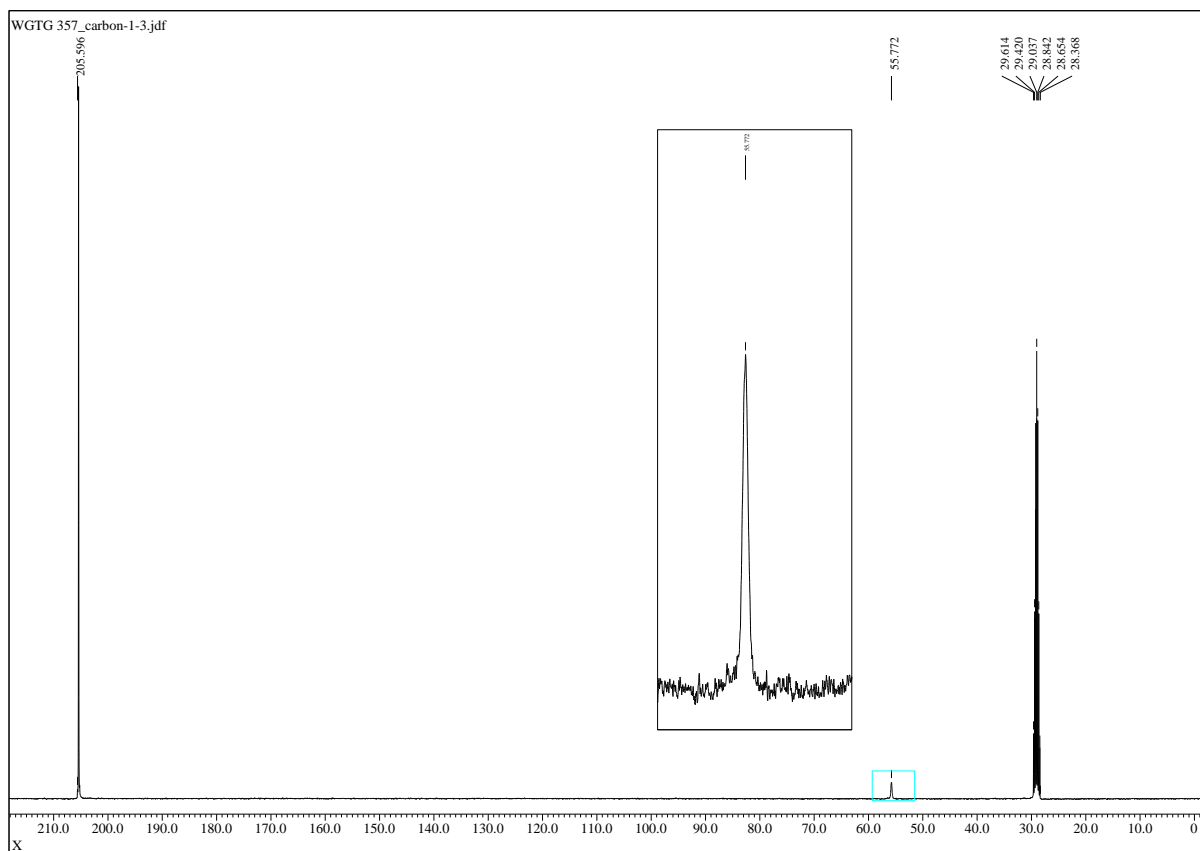

Fig. S25.  $^{13}\text{C}\{^1\text{H}\}$  NMR spectrum of  $\text{Cs}[\text{CoSAN-Cl}_2]$  in acetone- $d_6$  (100 MHz).

### 1.3. Characterization of $[\text{CoSAN-Br}_2]^-$

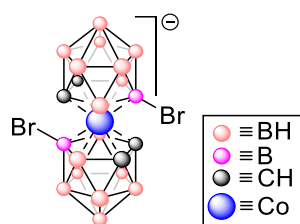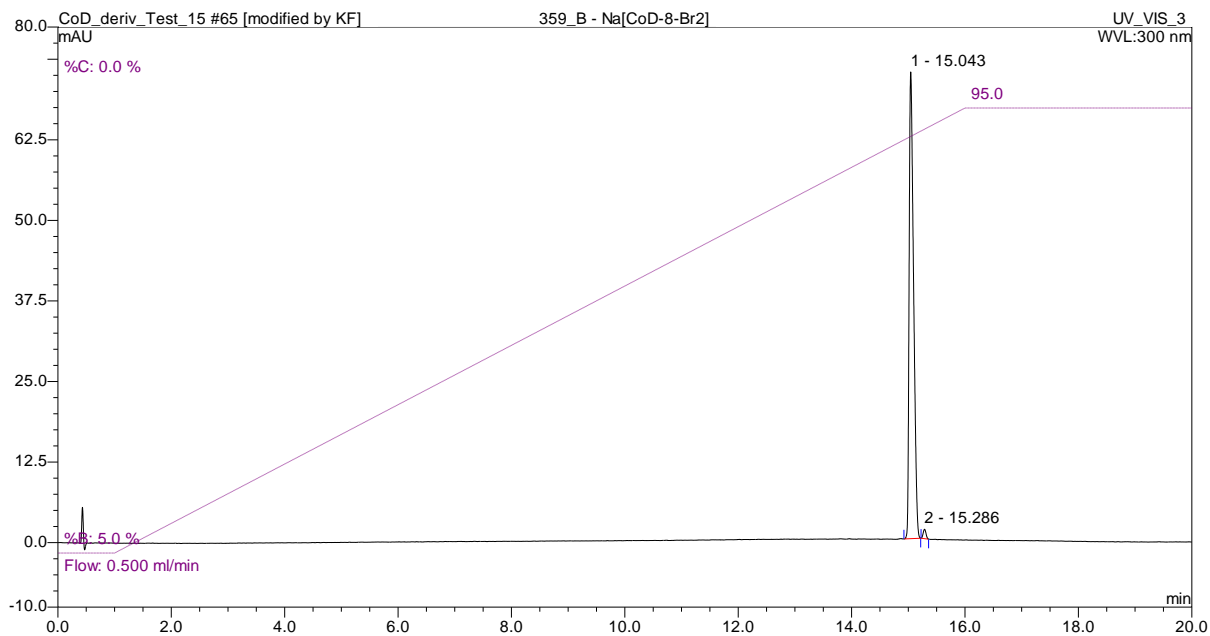

Fig. S26. HPLC chromatogram of  $[\text{CoSAN-Br}_2]^-$ . Purity – 98.73%

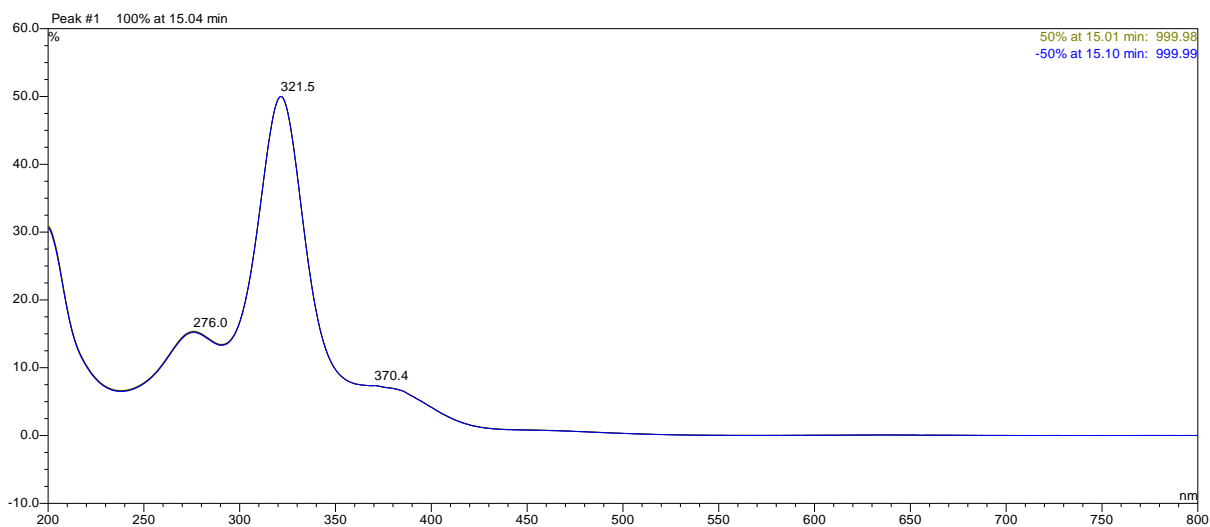

Fig. S27. UV-VIS spectrum of  $[\text{CoSAN-Br}_2]^-$  (peak purity analysis).



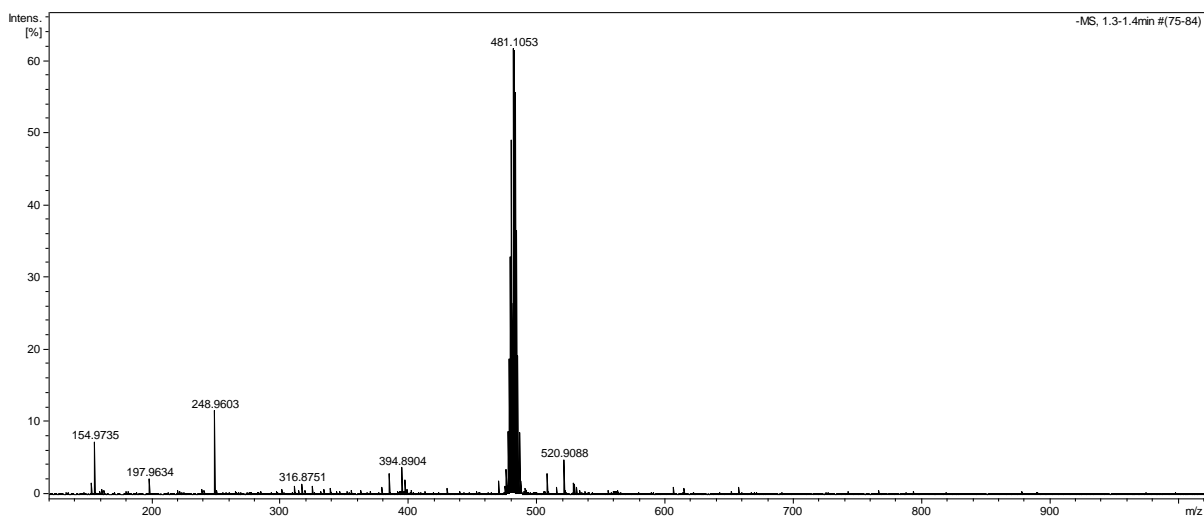

Fig. S28. ESI-MS spectrum of  $[\text{CoSAN-Br}_2]^-$

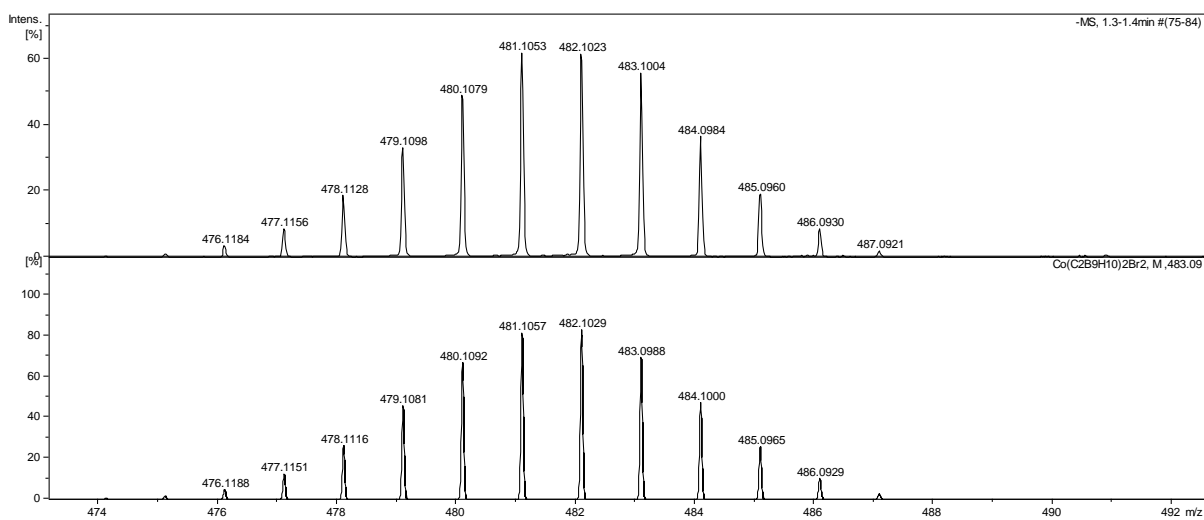

Fig. S29. Measured (top) and simulated (bottom) ESI-MS spectrum of  $[\text{CoSAN-Br}_2]^-$  – isotope pattern.

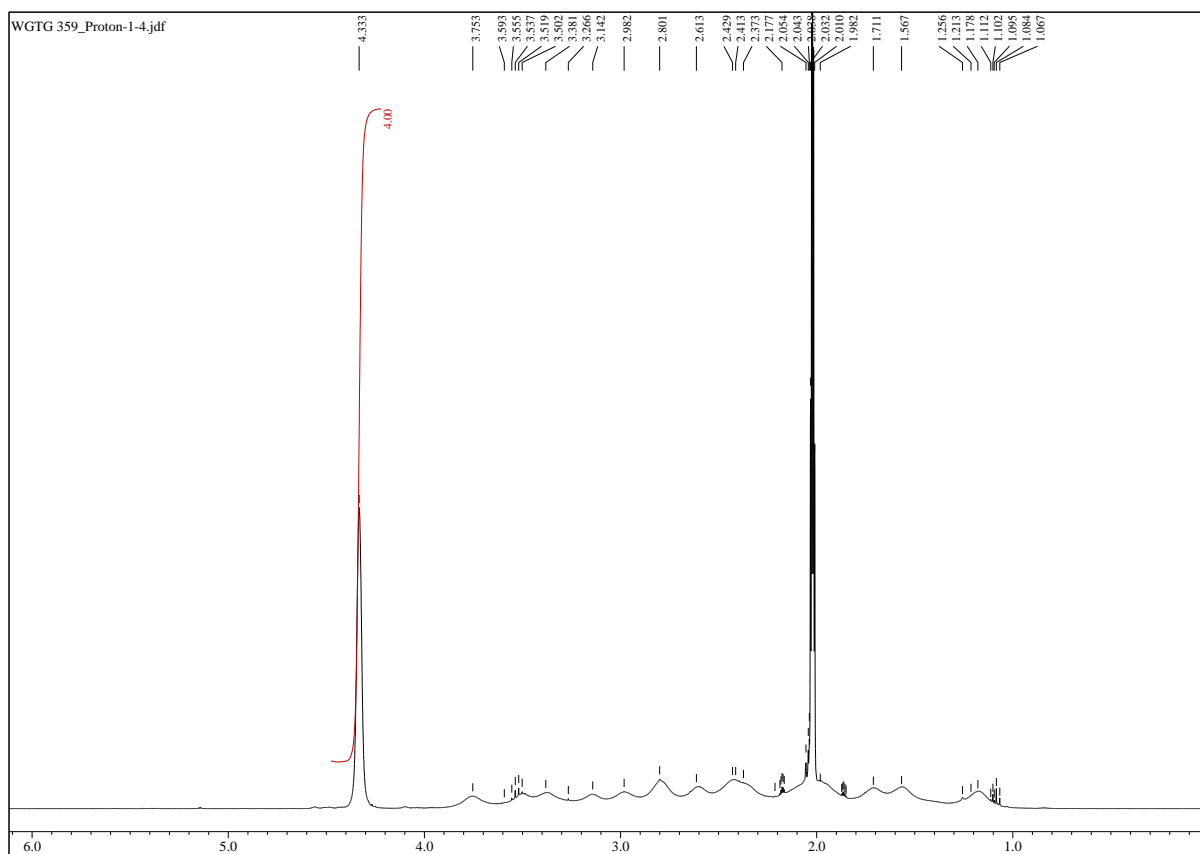

Fig. S30.  $^1\text{H}$  NMR spectrum of  $\text{Cs}[\text{CoSAN-Br}_2]$  in acetone- $d_6$  (400 MHz).

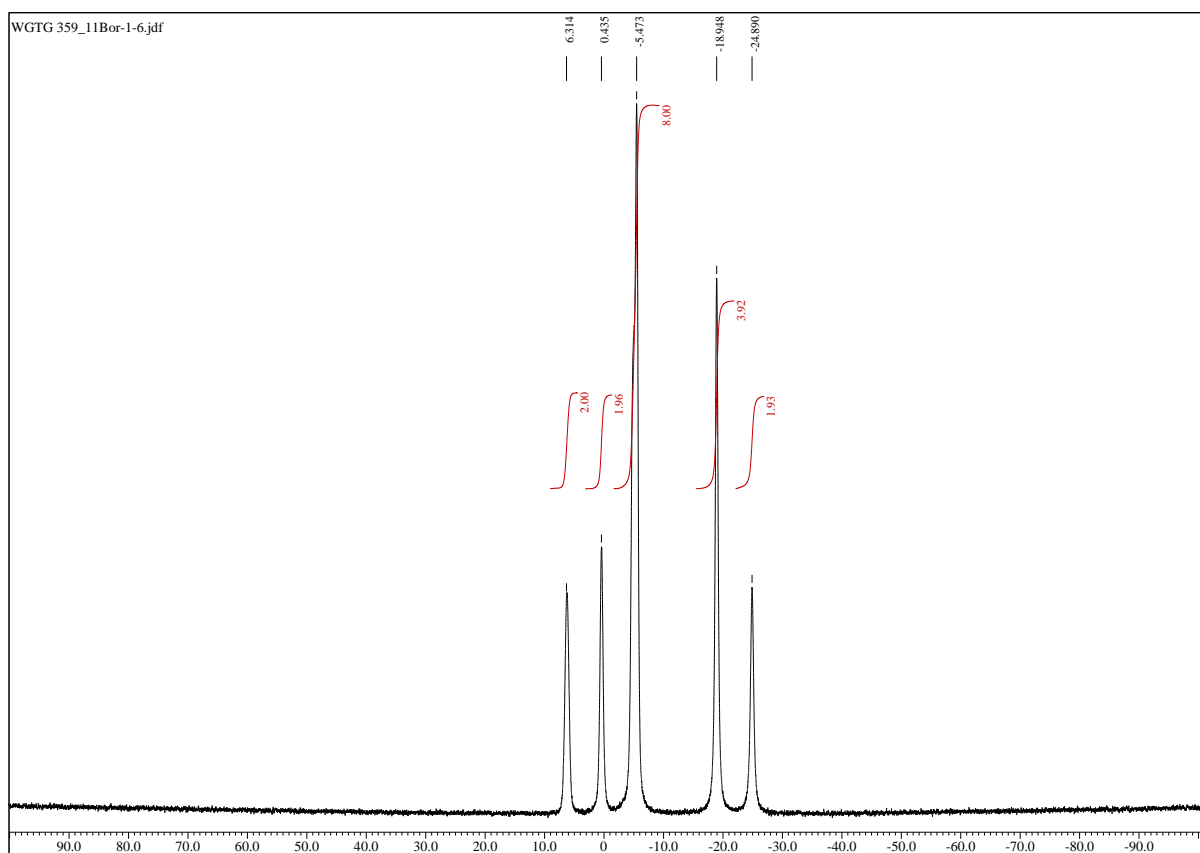

Fig. S31. Fig. S28.  $^{11}\text{B}\{^1\text{H}\}$  NMR spectrum of  $\text{Cs}[\text{CoSAN-Br}_2]$  in acetone- $d_6$  (128 MHz).

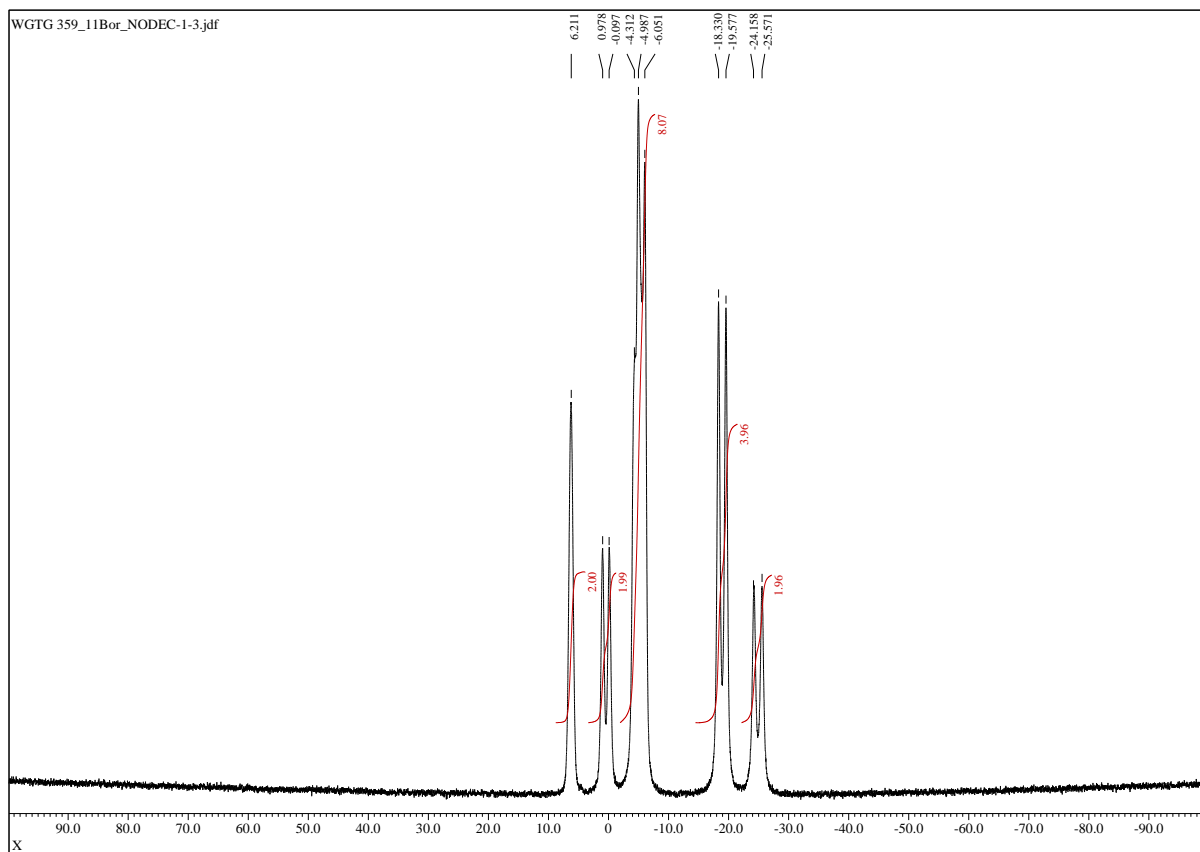

Fig. S32.  $^{11}\text{B}$  NMR spectrum of  $\text{Cs}[\text{CoSAN-Br}_2]$  in acetone- $d_6$  (128 MHz).

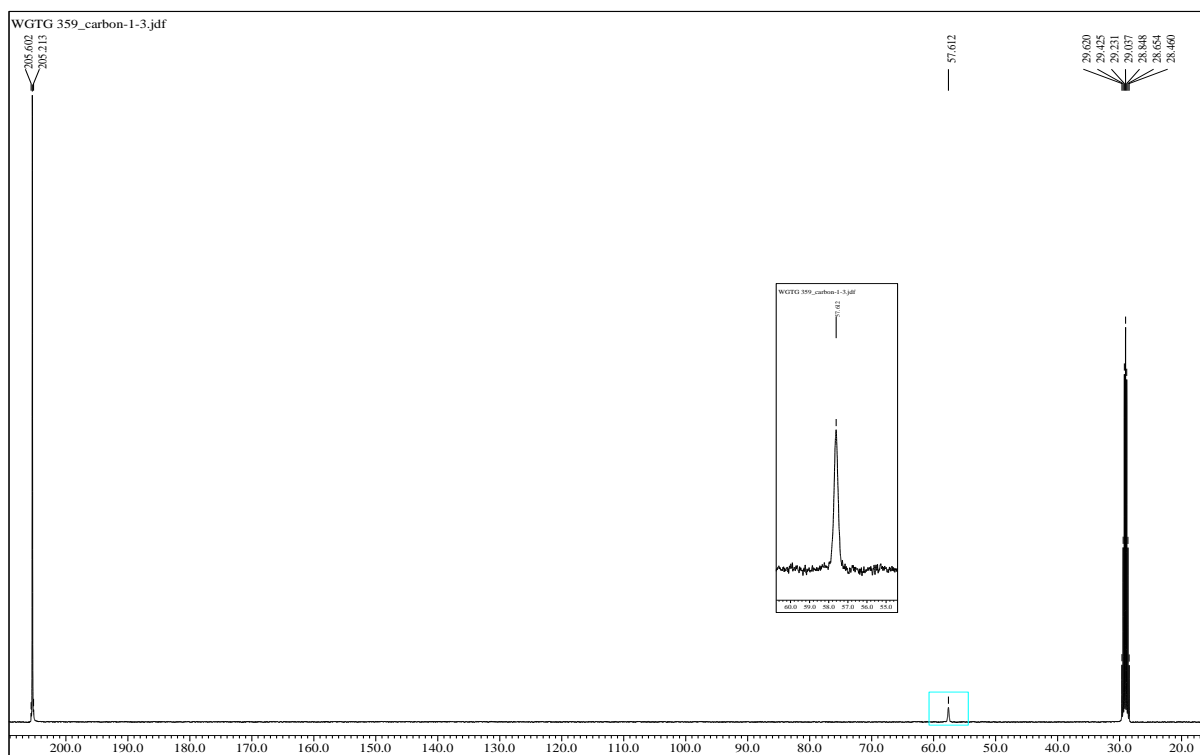

Fig. S33.  $^{13}\text{C}\{^1\text{H}\}$  NMR spectrum of  $\text{Cs}[\text{CoSAN-Br}_2]$  in acetone- $d_6$  (100 MHz).

#### 1.4. Characterization of [CoSAN-I<sub>2</sub>]<sup>-</sup>

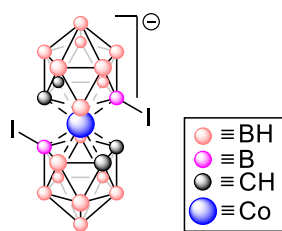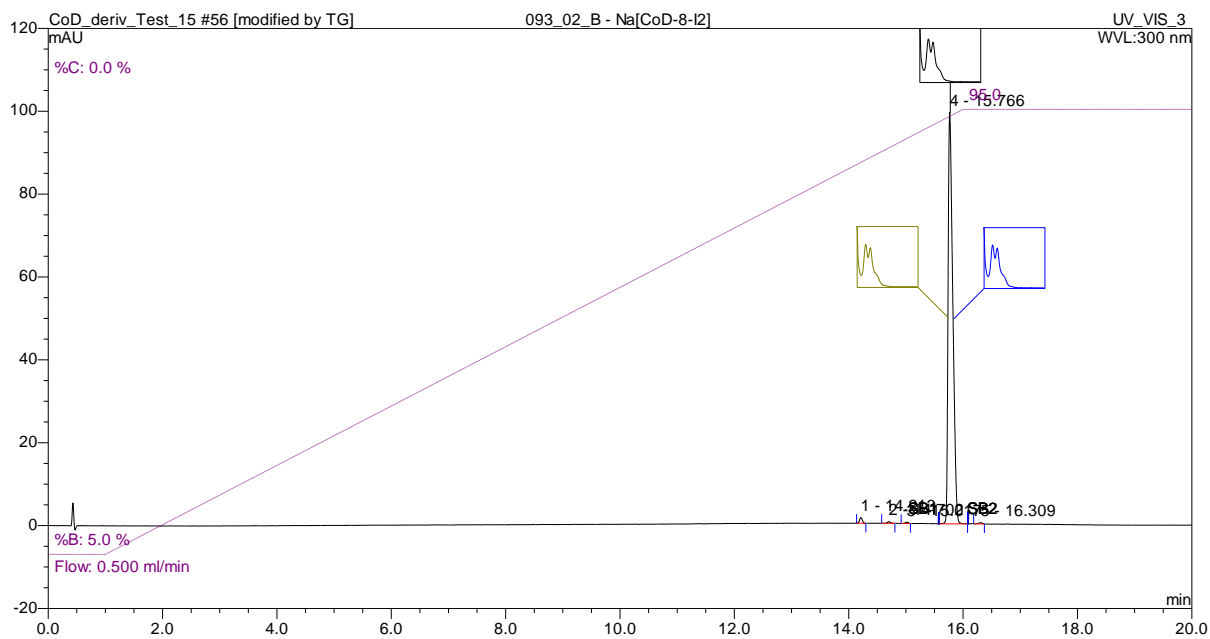

Fig. S34. HPLC chromatogram of [CoSAN-I<sub>2</sub>]<sup>-</sup>. Purity – 98.54%

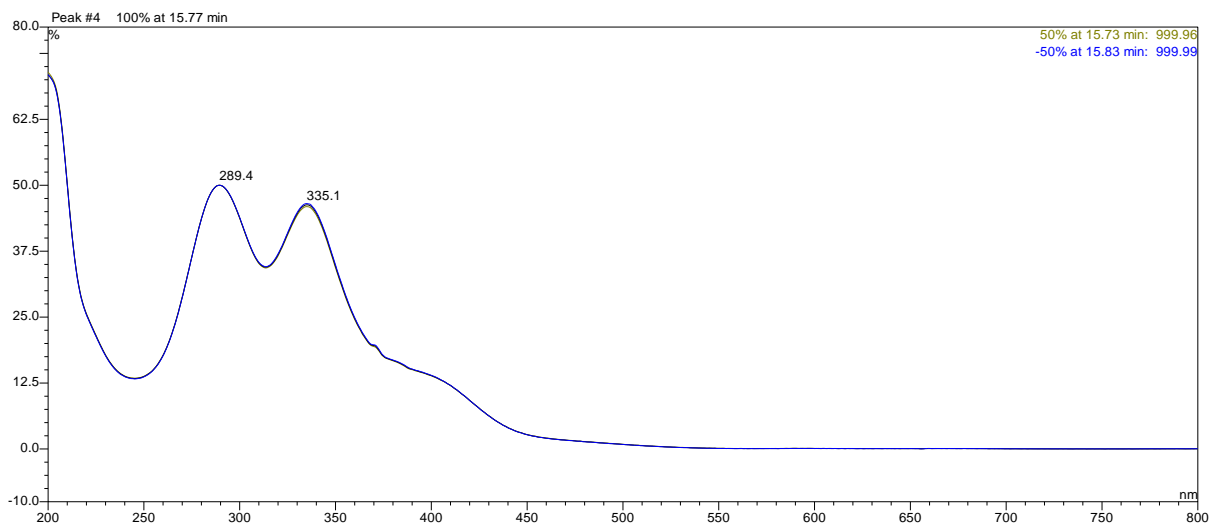

Fig. S35. UV-VIS spectrum of [CoSAN-I<sub>2</sub>]<sup>-</sup> (peak purity analysis).

### 1.5. Characterization of [CoSAN-Cl]<sup>-</sup>

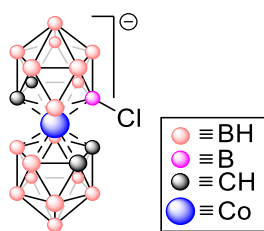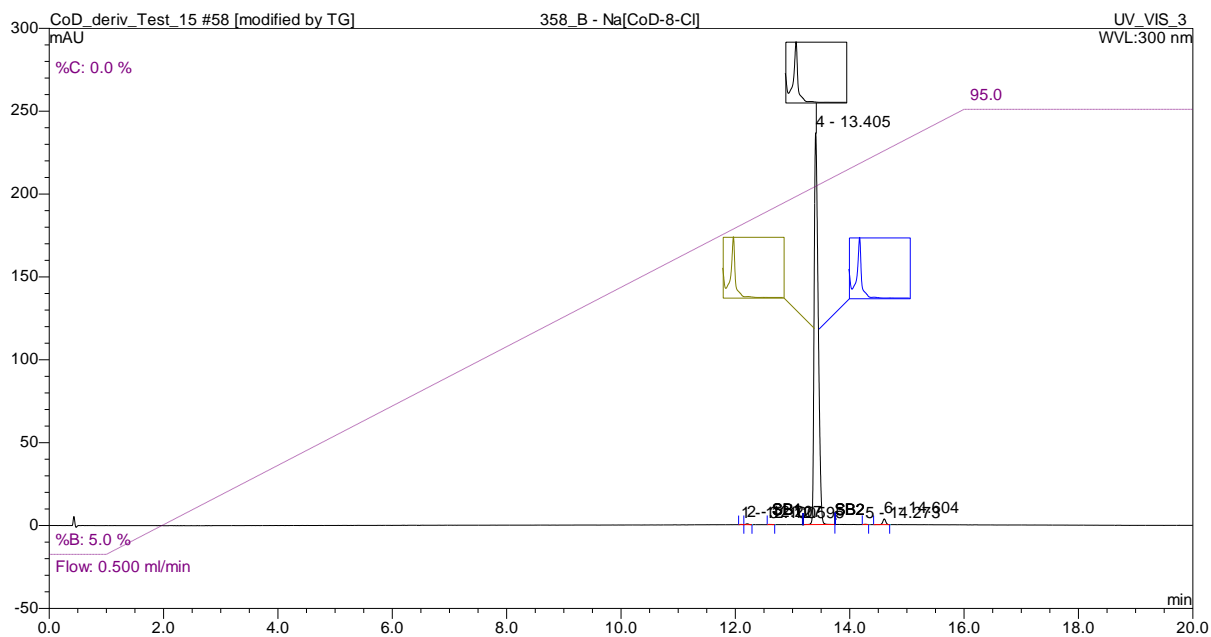

Fig. S36. HPLC chromatogram of [CoSAN-Cl]<sup>-</sup>. Purity – 98.73%

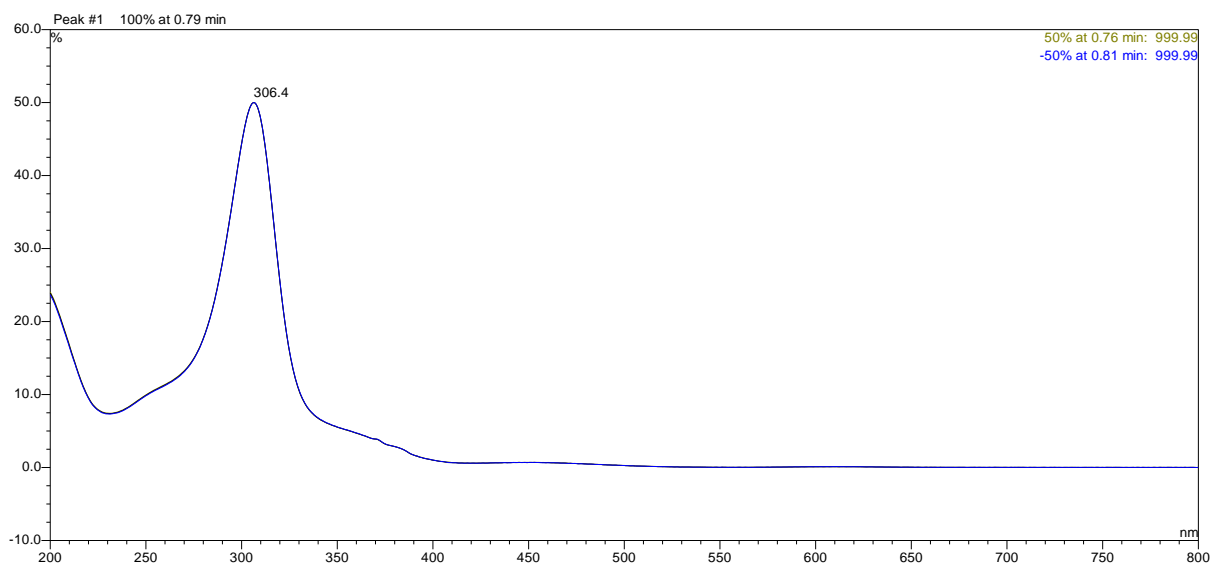

Fig. S37. UV-VIS spectrum of [CoSAN-Cl]<sup>-</sup> (peak purity analysis).

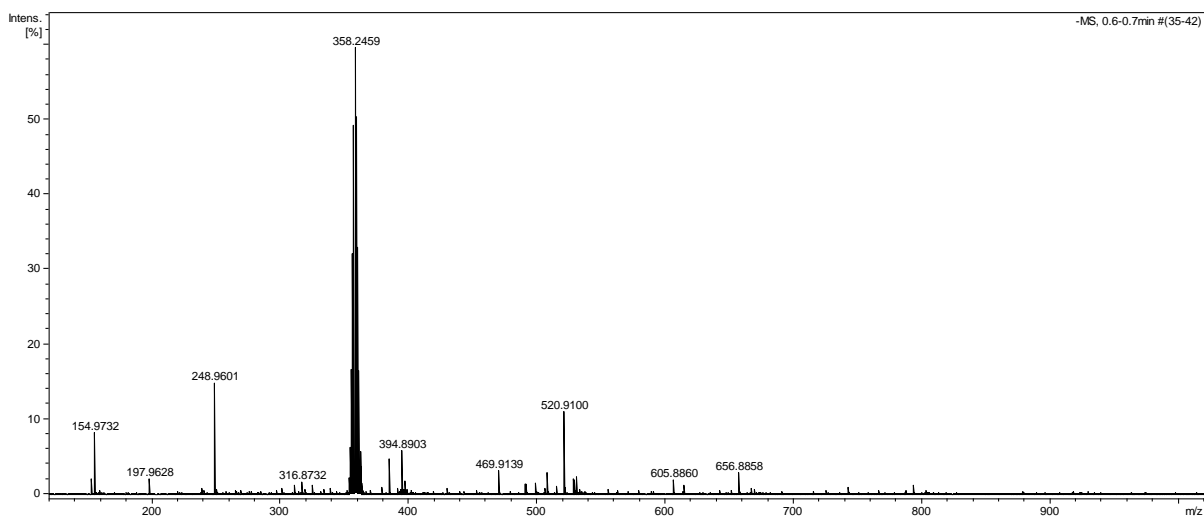

Fig. S38. ESI-MS spectrum of [CoSAN-Cl].

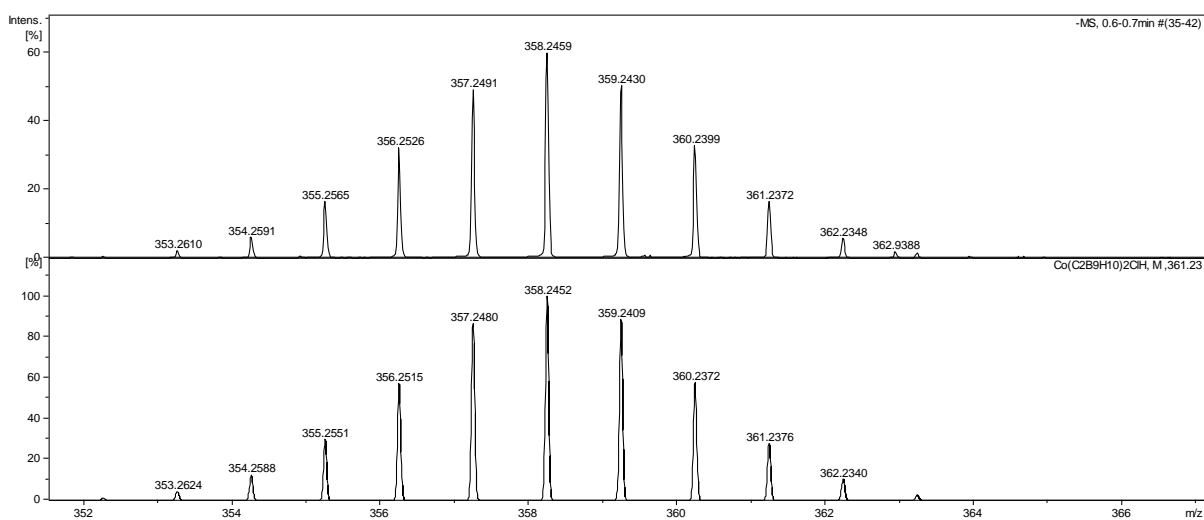

Fig. S39. Measured (top) and simulated (bottom) ESI-MS spectrum of [CoSAN-Cl] – isotope pattern.

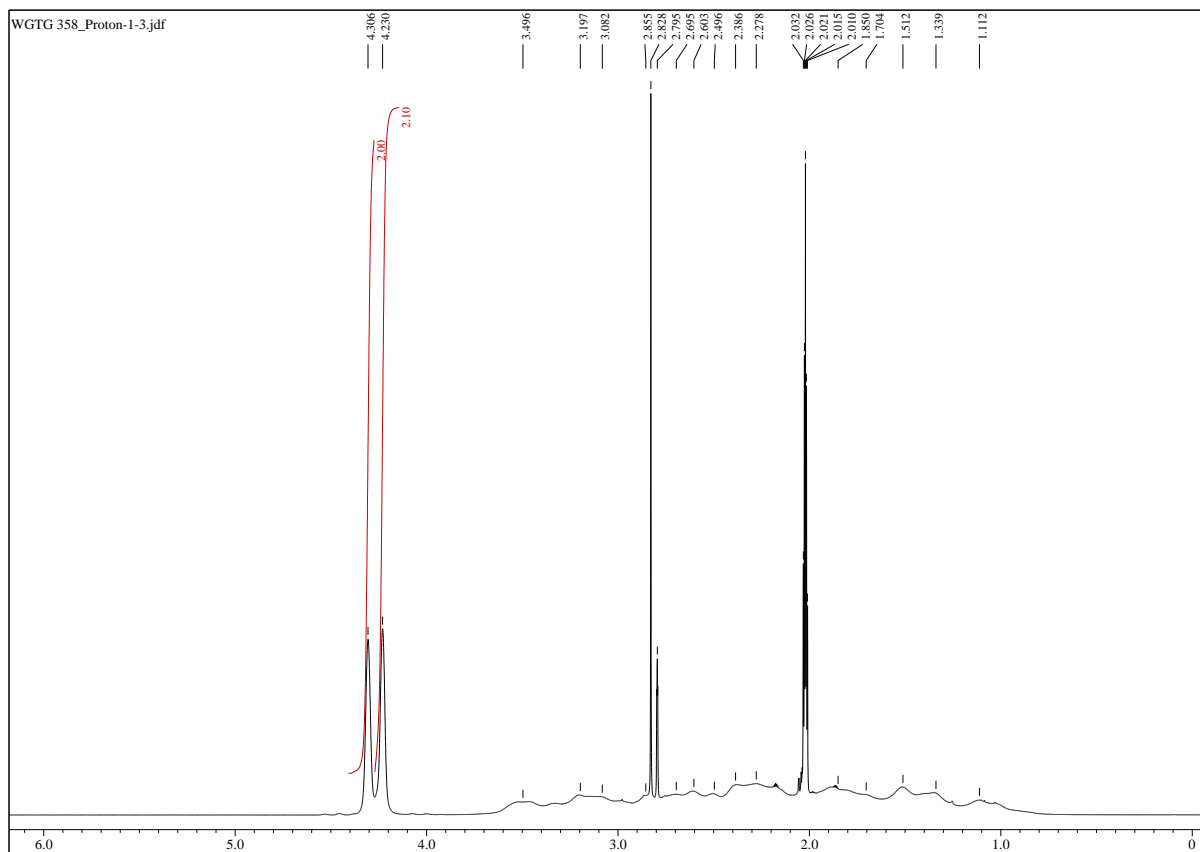

Fig. S40.  $^1\text{H}$  NMR spectrum of  $\text{Cs}[\text{CoSAN-Cl}]$  in acetone- $d_6$  (400 MHz).

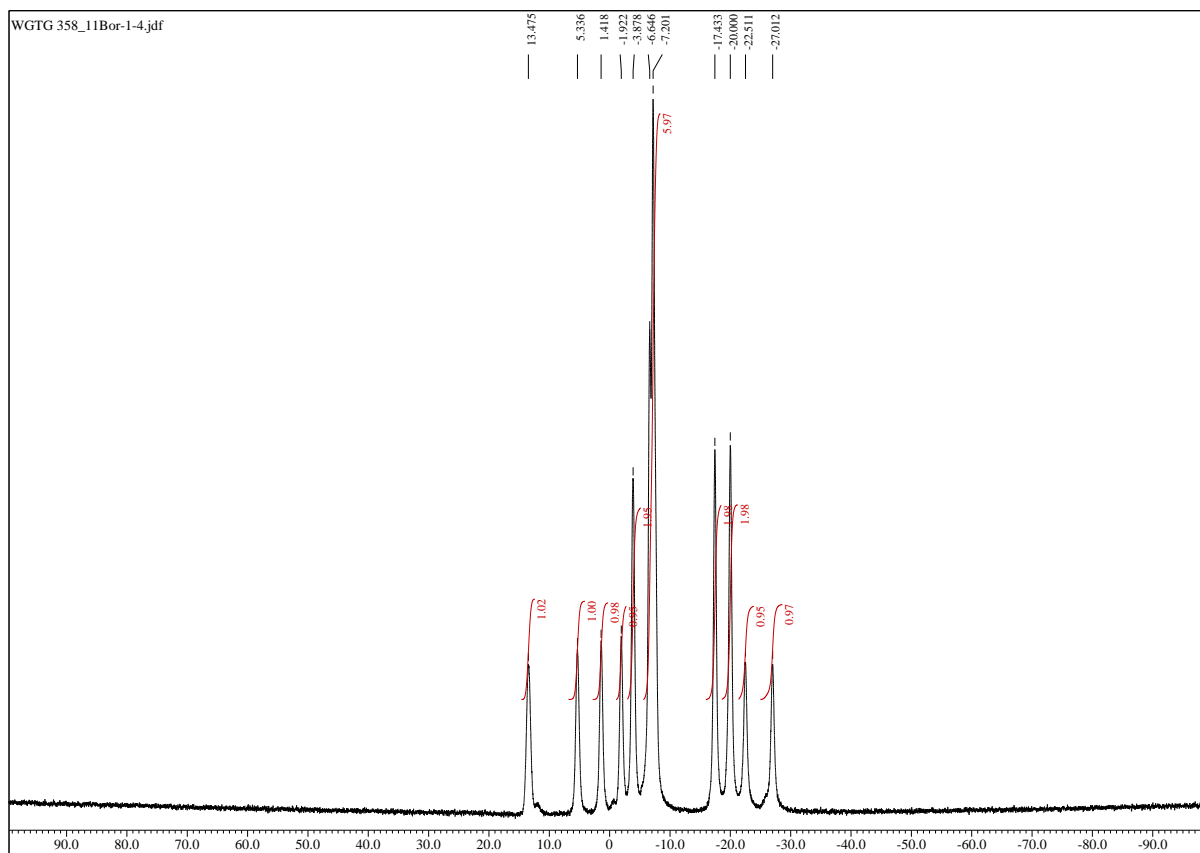

Fig. S41.  $^{11}\text{B}\{^1\text{H}\}$  NMR spectrum of  $\text{Cs}[\text{CoSAN-Cl}]$  in acetone- $d_6$  (128 MHz).

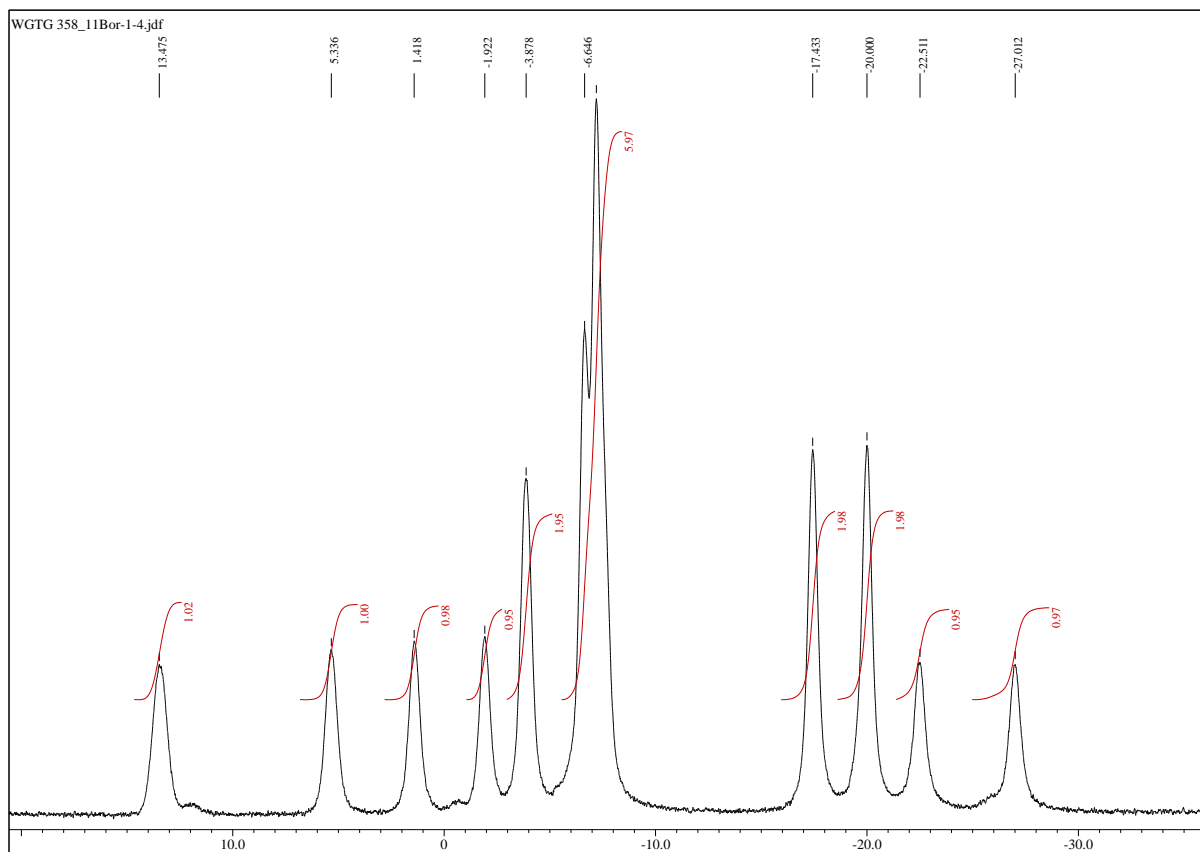

Fig. S42. Expanded  $^{11}\text{B}\{^1\text{H}\}$  NMR spectrum of  $\text{Cs}[\text{CoSAN-Cl}]$  in acetone- $d_6$  (128 MHz).

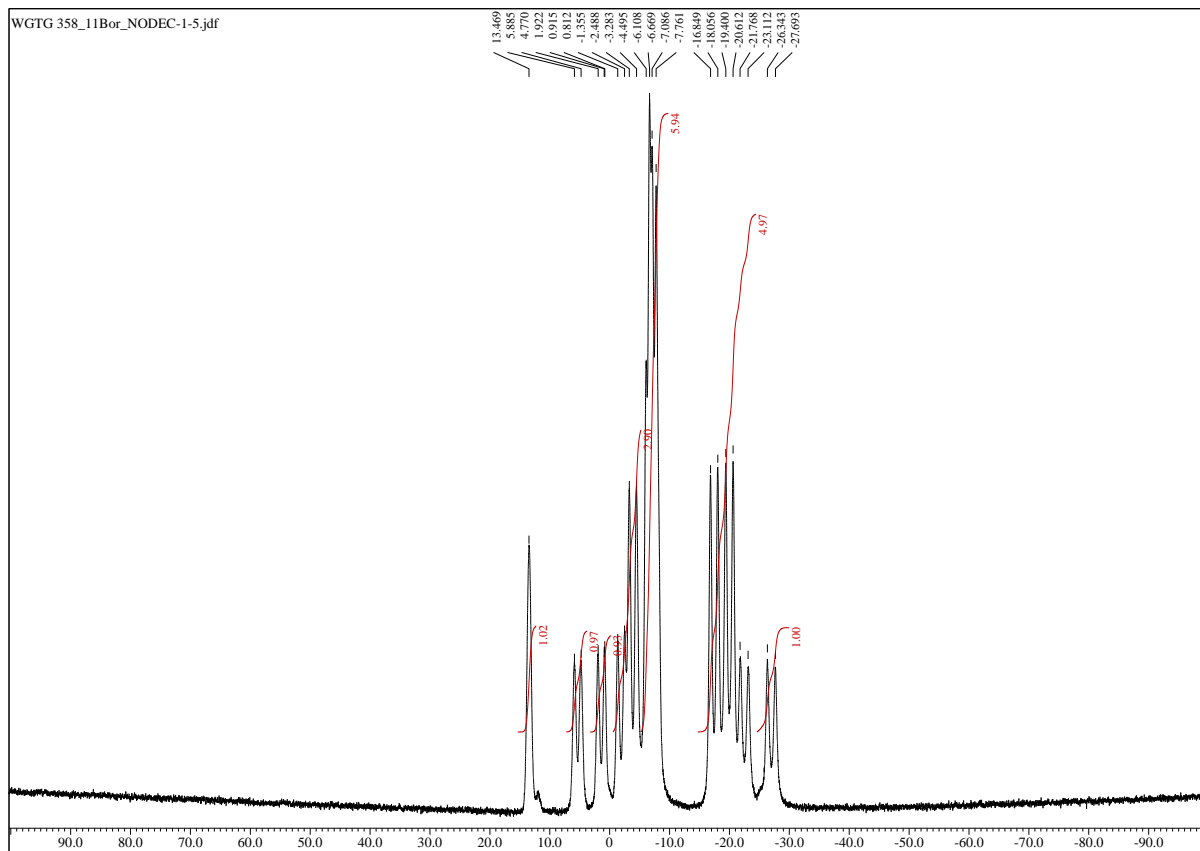

Fig. S43.  $^{11}\text{B}$  NMR spectrum of  $\text{Cs}[\text{CoSAN-Cl}]$  in acetone- $d_6$  (128 MHz).



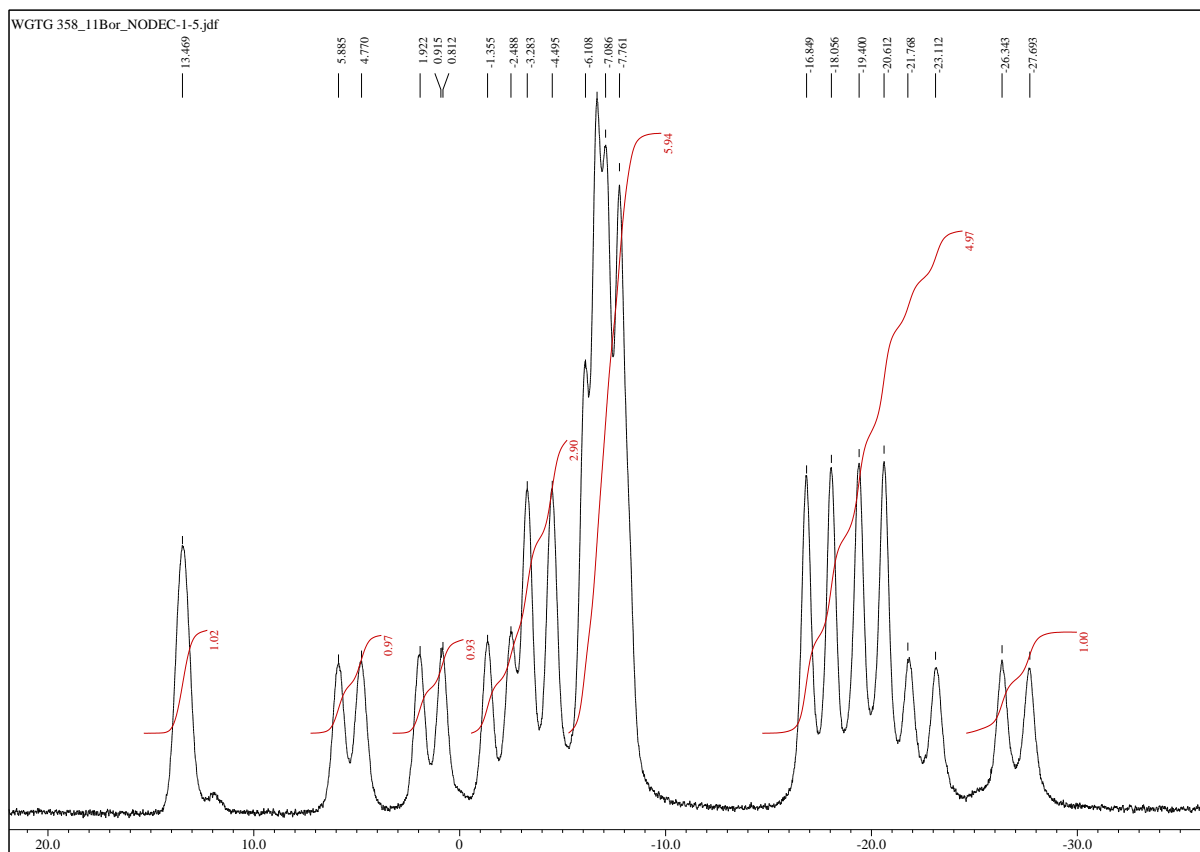

Fig. S44. Expanded  $^{11}\text{B}$  NMR spectrum of  $\text{Cs}[\text{CoSAN-Cl}]$  in acetone- $d_6$  (128 MHz).

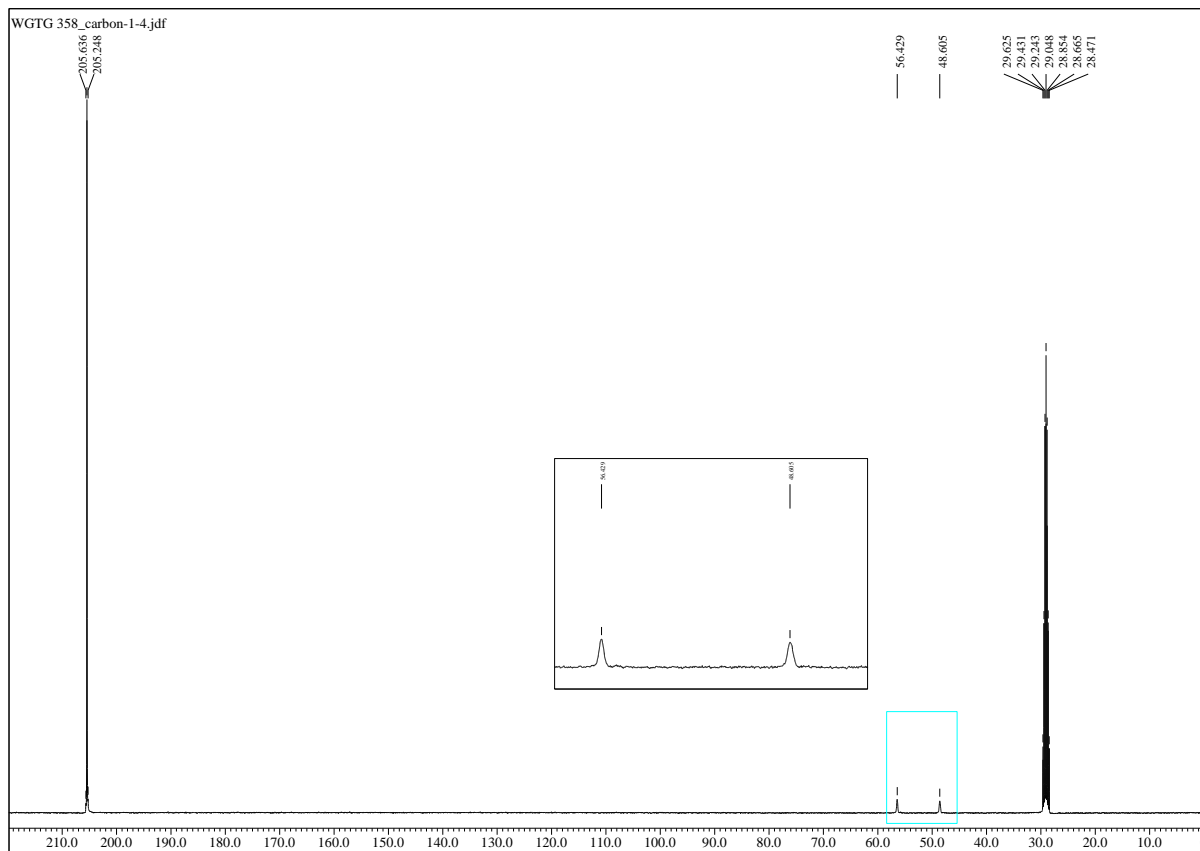

Fig. S45.  $^{13}\text{C}\{^1\text{H}\}$  NMR spectrum of  $\text{Cs}[\text{CoSAN-Cl}]$  in acetone- $d_6$  (100 MHz).

## 1.6. Characterization of [CoSAN-Br]<sup>-</sup>

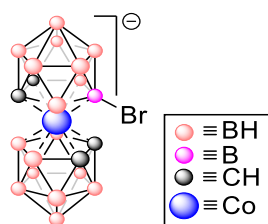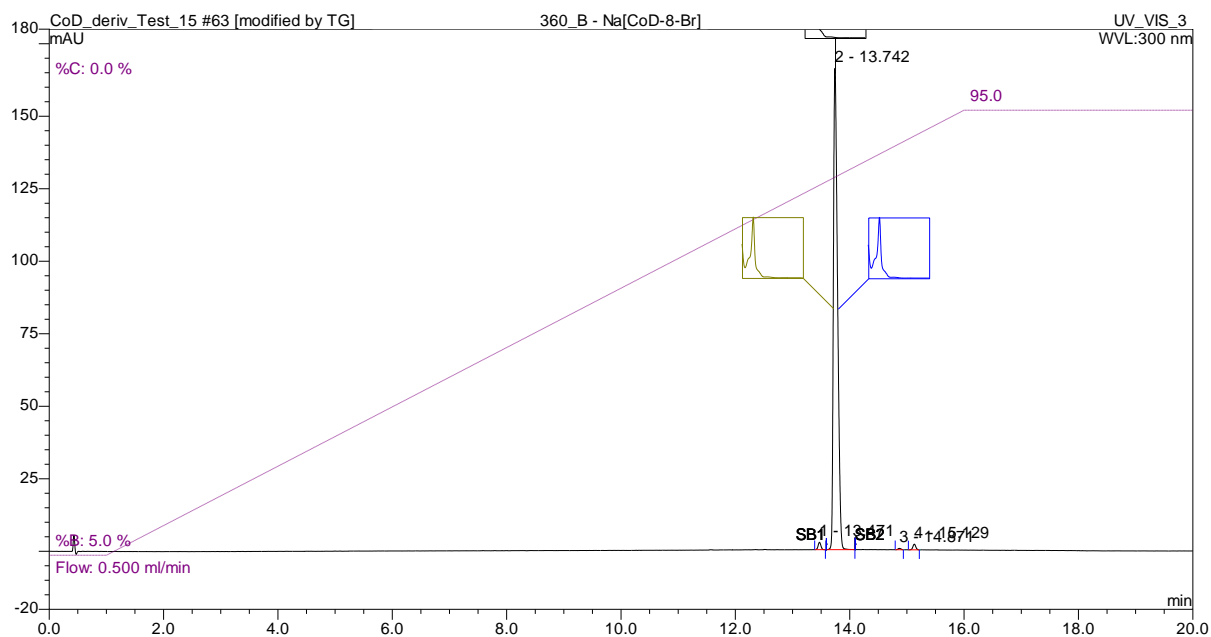

Fig. S46. HPLC chromatogram of [CoSAN-Br]<sup>-</sup>. Purity – 98.01%

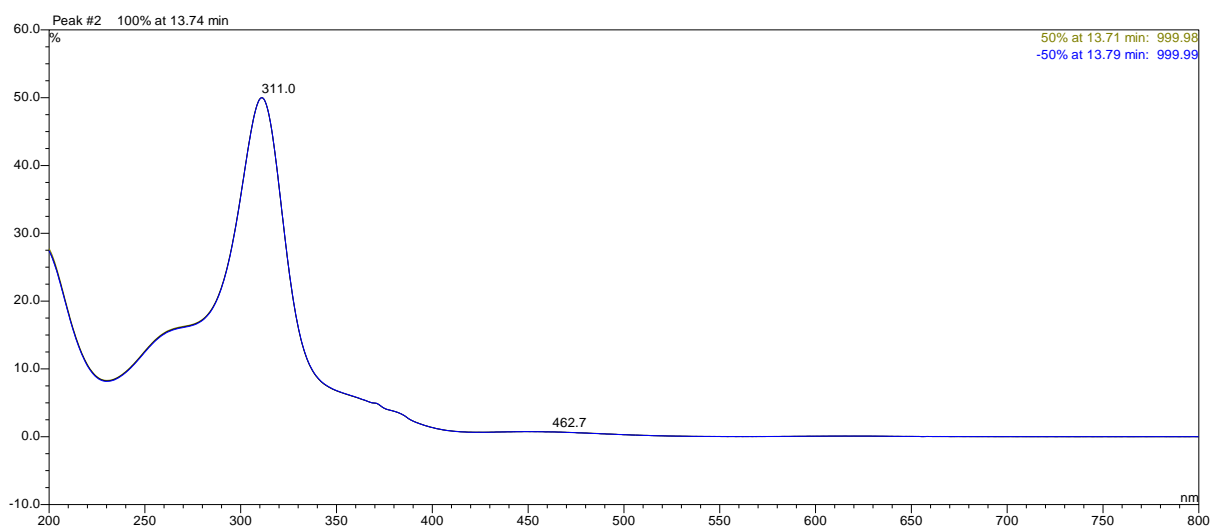

Fig. S47. UV-VIS spectrum of [CoSAN-Br]<sup>-</sup> (peak purity analysis).

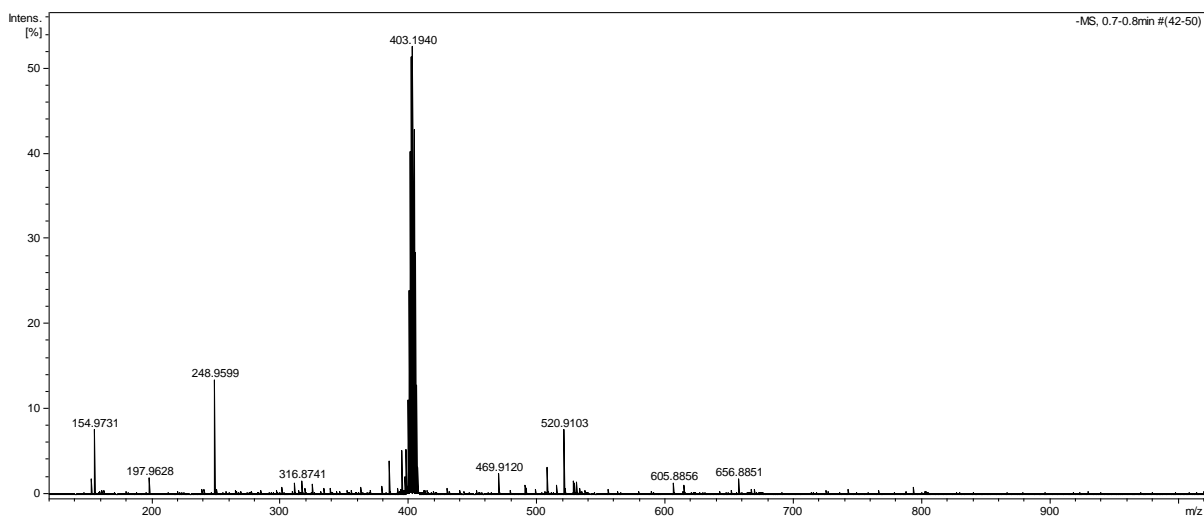

Fig. S48. ESI-MS spectrum of [CoSAN-Br].

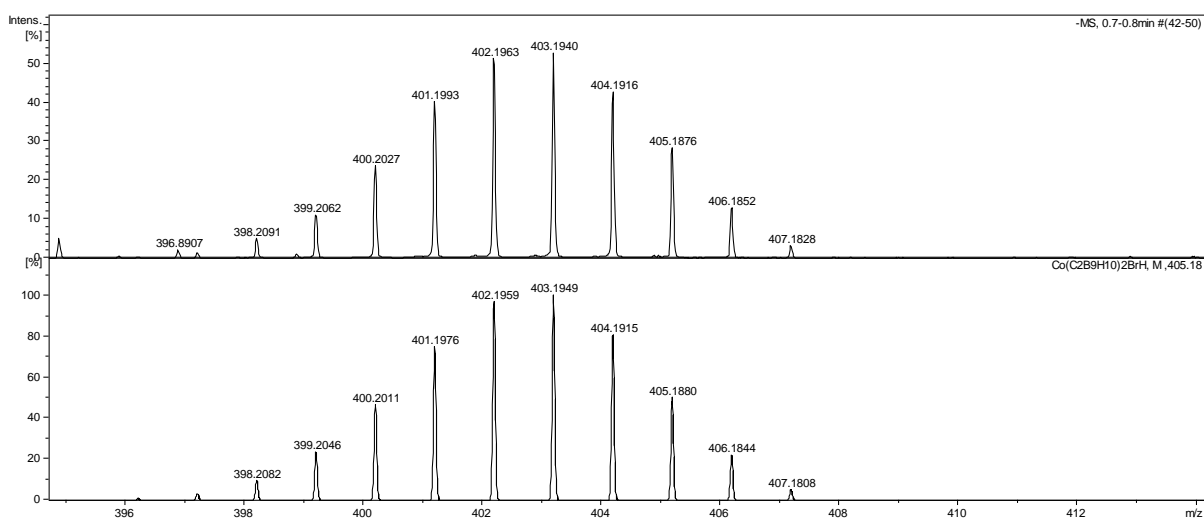

Fig. S49. Measured (top) and simulated (bottom) ESI-MS spectrum of [CoSAN-Br] – isotope pattern.

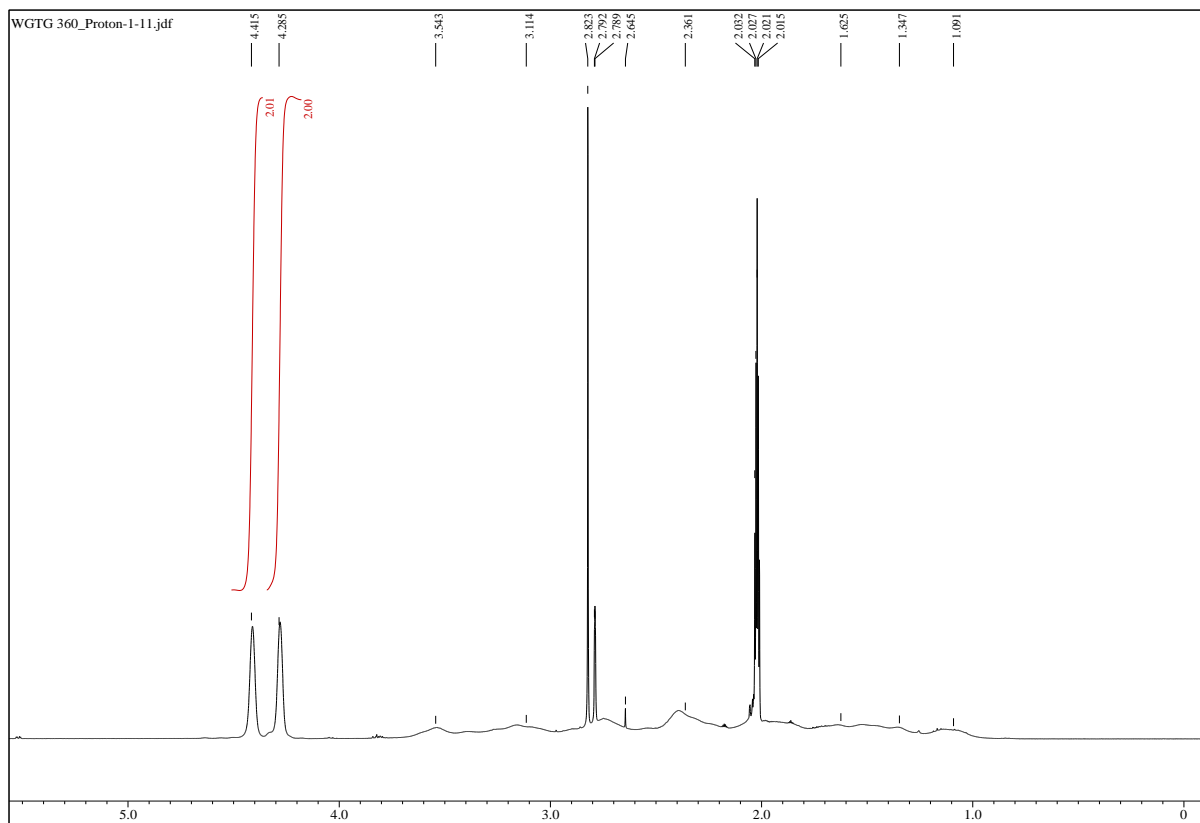

Fig. S50.  $^1\text{H}$  NMR spectrum of  $\text{Cs}[\text{CoSAN-Br}]$  in  $\text{acetone-}d_6$  (400 MHz).

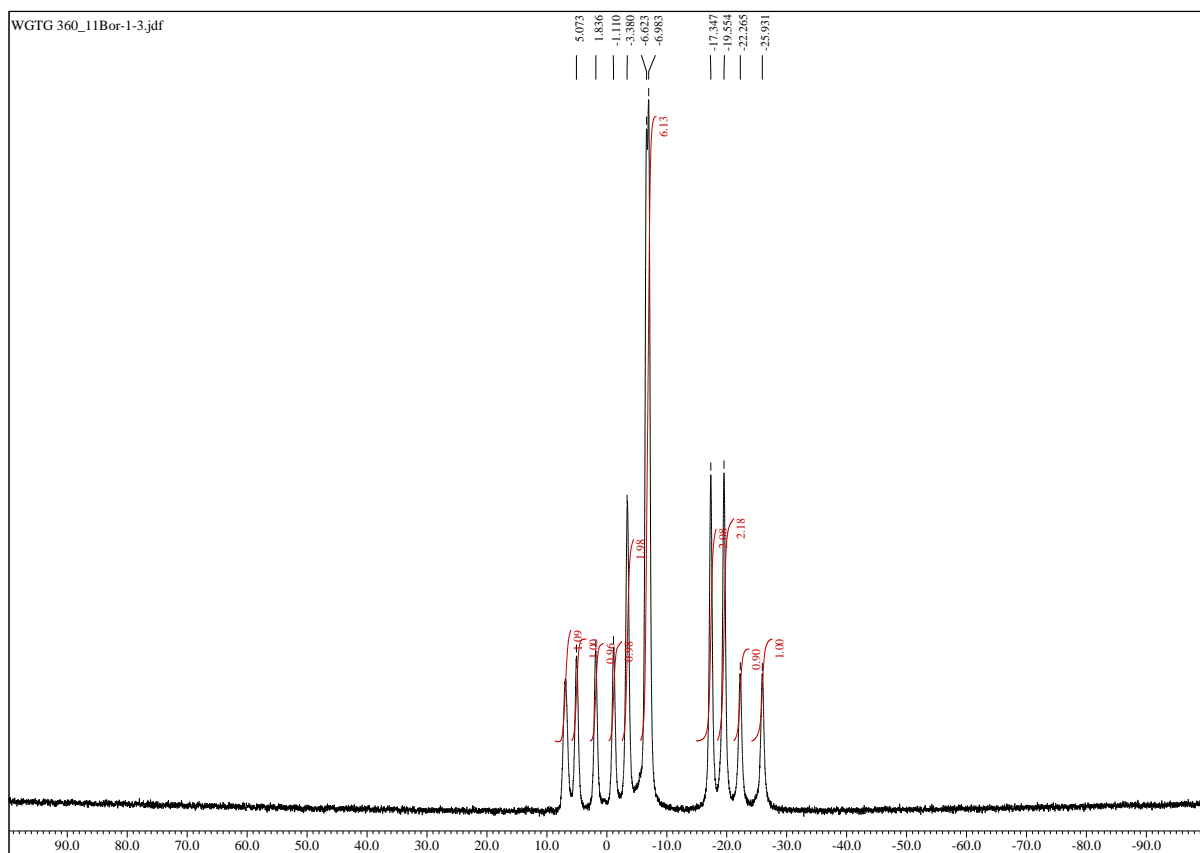

Fig. S51.  $^{11}\text{B}\{^1\text{H}\}$  NMR spectrum of  $\text{Cs}[\text{CoSAN-Br}]$  in  $\text{acetone-}d_6$  (128 MHz).

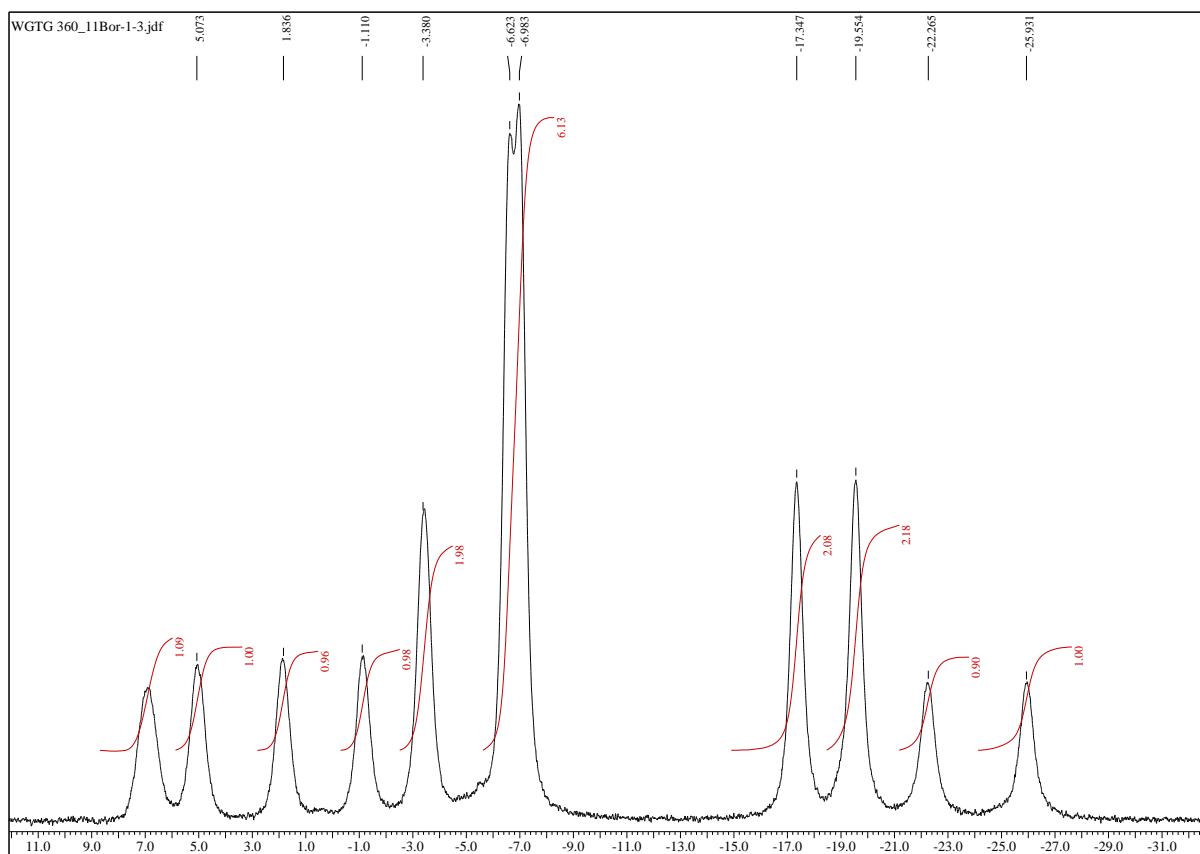

Fig. S52. Expanded  $^{11}\text{B}\{^1\text{H}\}$  NMR spectrum of  $\text{Cs}[\text{CoSAN-Br}]$  in acetone- $d_6$  (128 MHz).

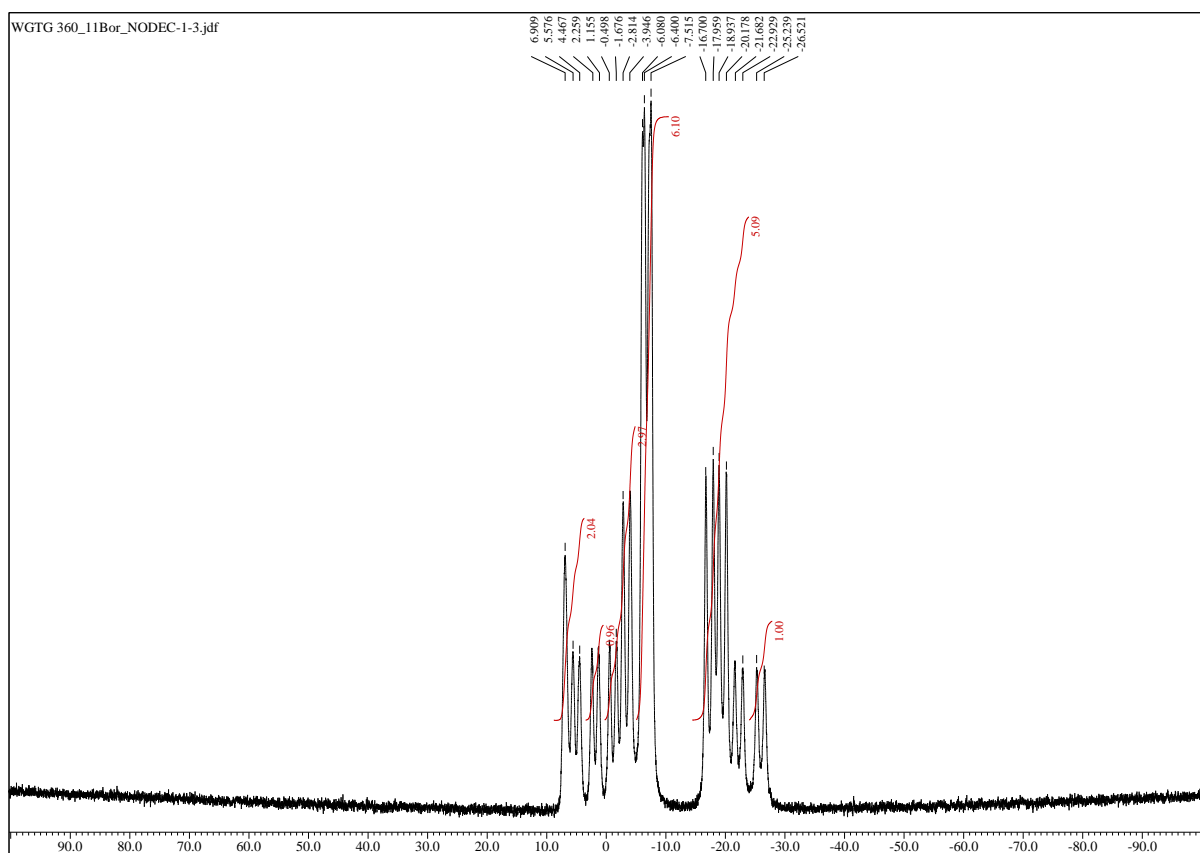

Fig. S53.  $^{11}\text{B}$  NMR spectrum of  $\text{Cs}[\text{CoSAN-Br}]$  in acetone- $d_6$  (128 MHz).

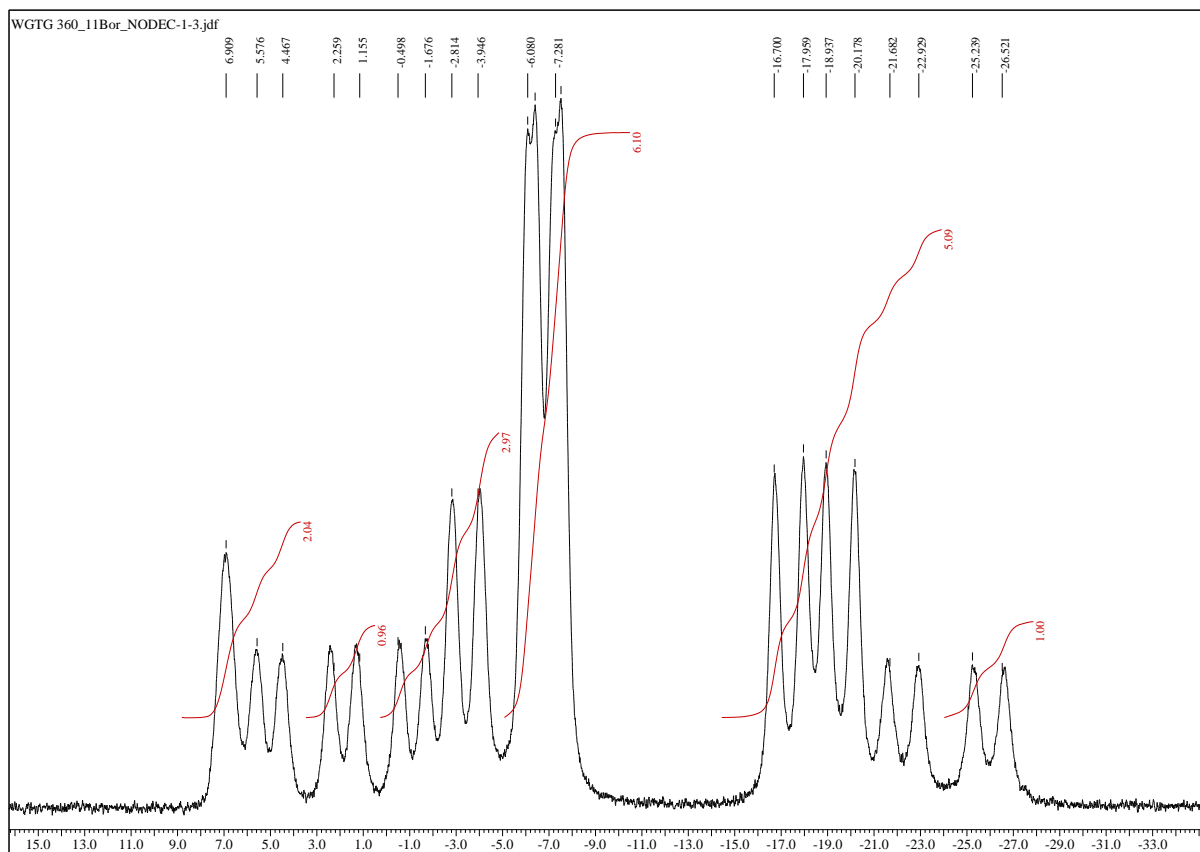

Fig. S54. Expanded  $^{11}\text{B}$  NMR spectrum of  $\text{Cs}[\text{CoSAN-Br}]$  in acetone- $d_6$  (128 MHz).

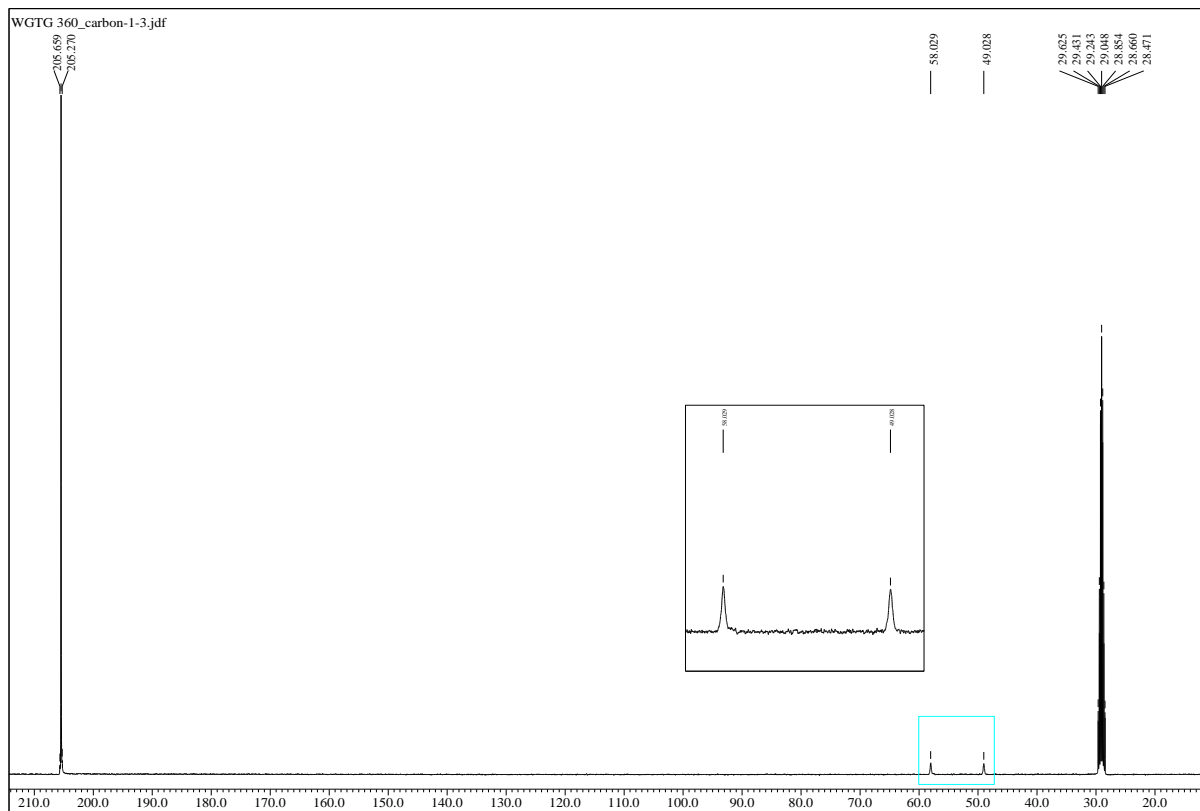

Fig. S55.  $^{13}\text{C}\{^1\text{H}\}$  NMR spectrum of  $\text{Cs}[\text{CoSAN-Br}]$  in acetone- $d_6$  (100 MHz).

## 1.7. Characterization of [CoSAN-I]<sup>-</sup>

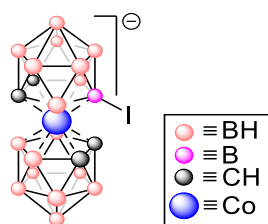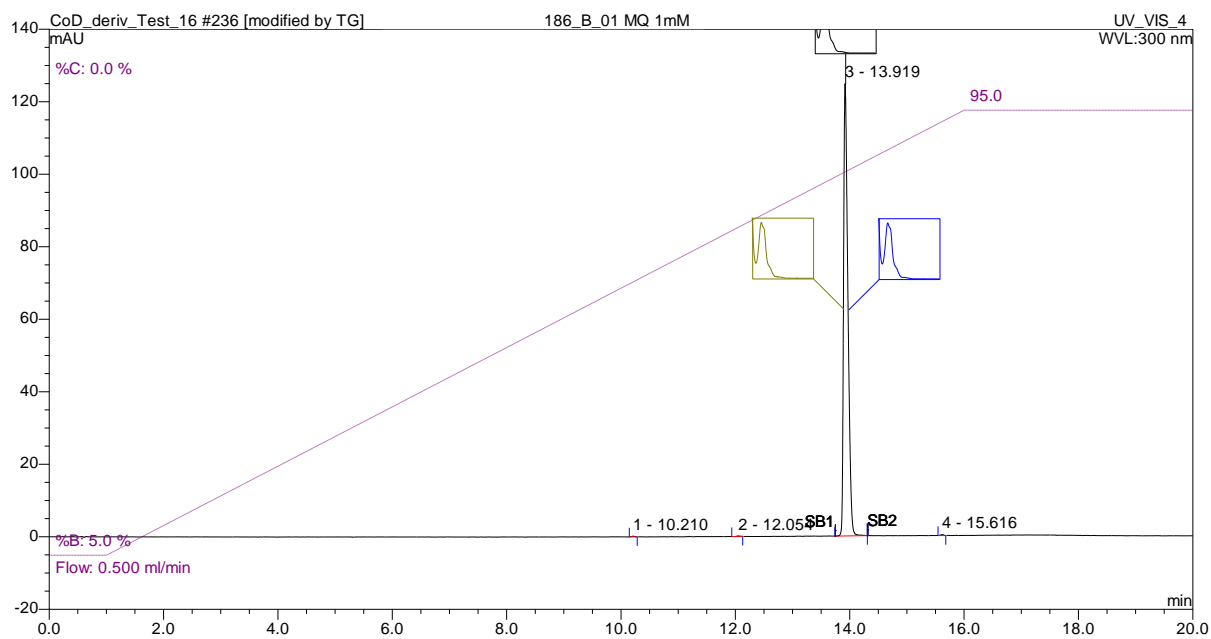

Fig. S56. HPLC chromatogram of [CoSAN-I]. Purity – 99.68%

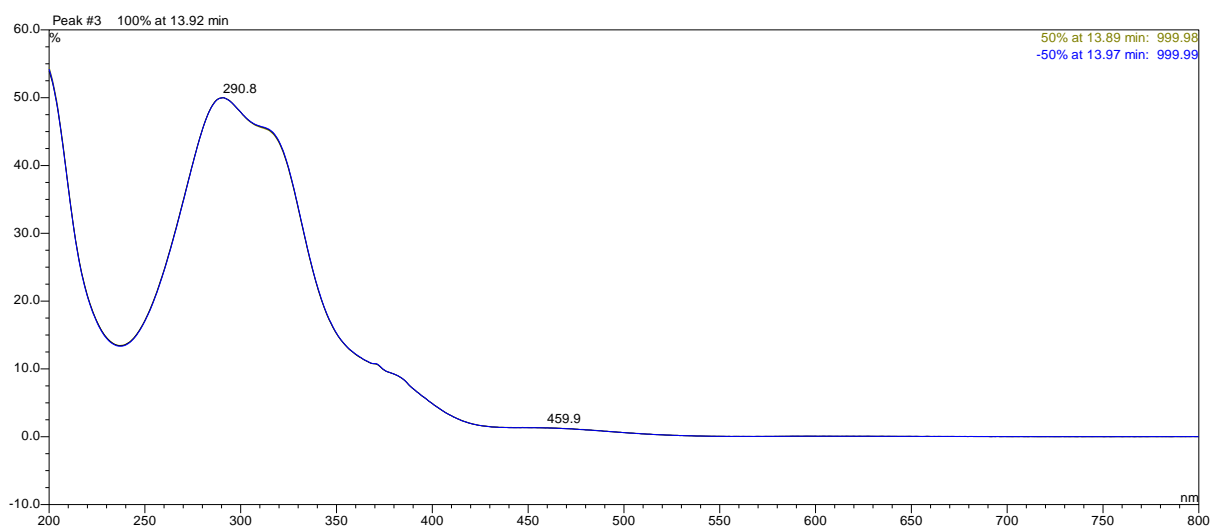

Fig. S57. UV-VIS spectrum of [CoSAN-I] (peak purity analysis).

## 1.8. Characterization of [CoSAN-Cl,Br]<sup>-</sup>

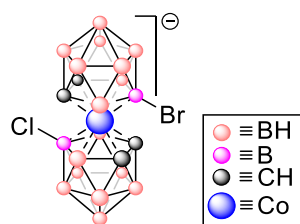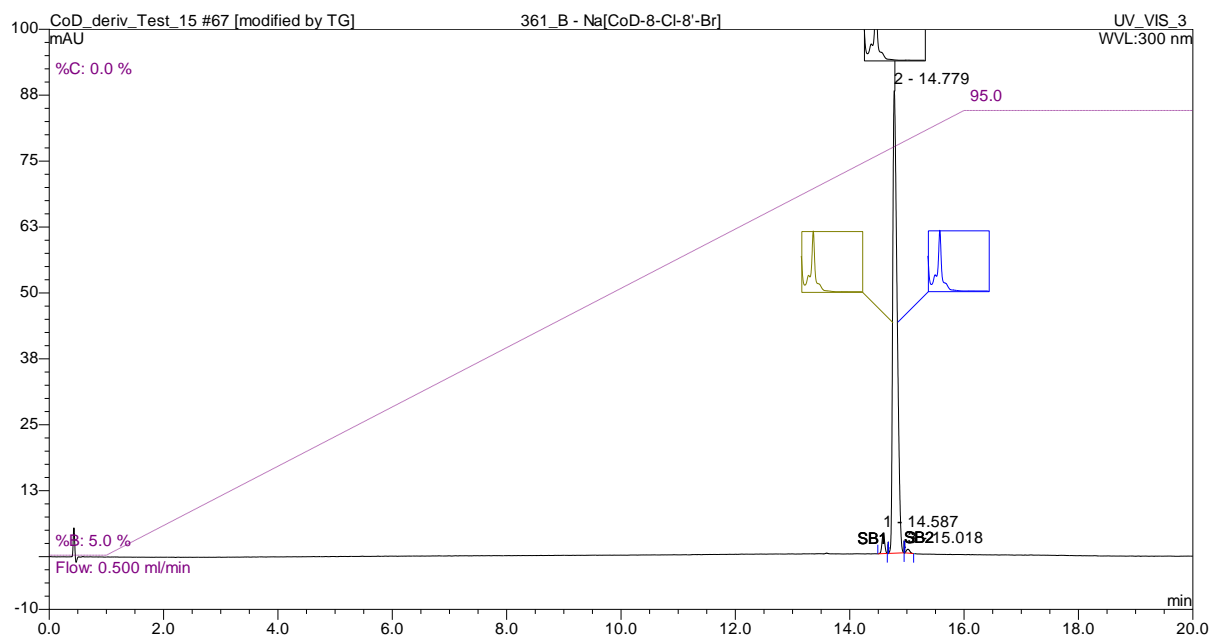

Fig. S58. HPLC chromatogram of [CoSAN-Cl,Br]<sup>-</sup>. Purity – 96.82%

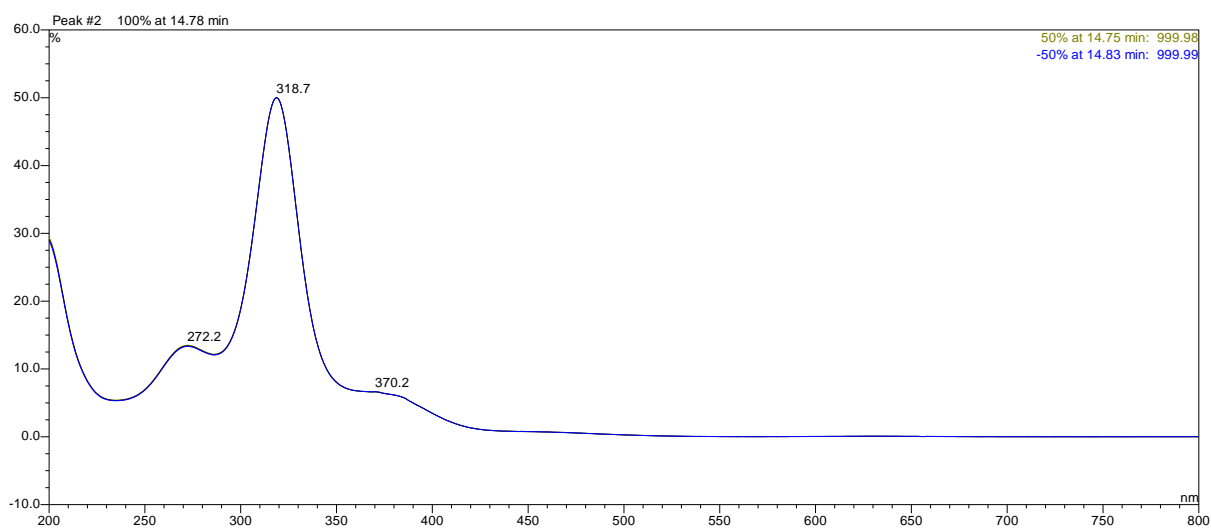

Fig. S59. UV-VIS spectrum of [CoSAN-Cl,Br]<sup>-</sup> (peak purity analysis).



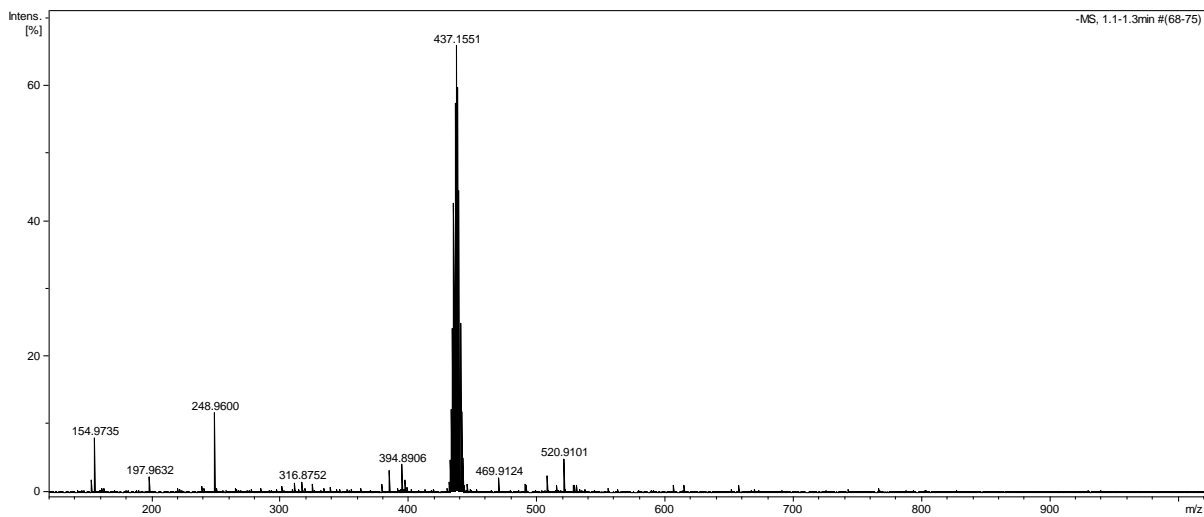

Fig. S60. ESI-MS spectrum of  $[\text{CoSAN-Cl,Br}]$ .

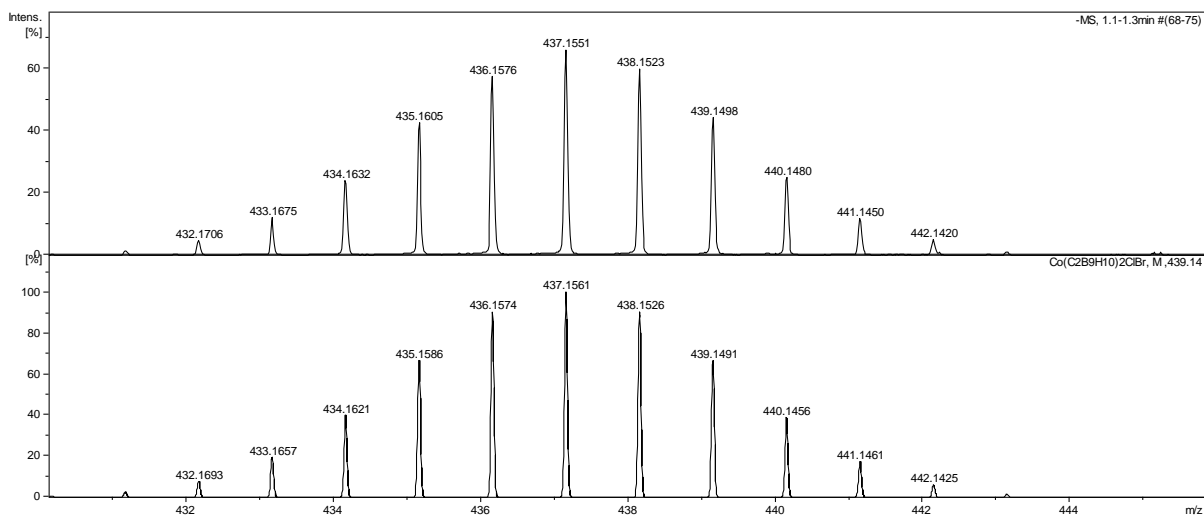

Fig. S61. Measured (top) and simulated (bottom) ESI-MS spectrum of  $[\text{CoSAN-Cl,Br}]$  – isotope pattern.

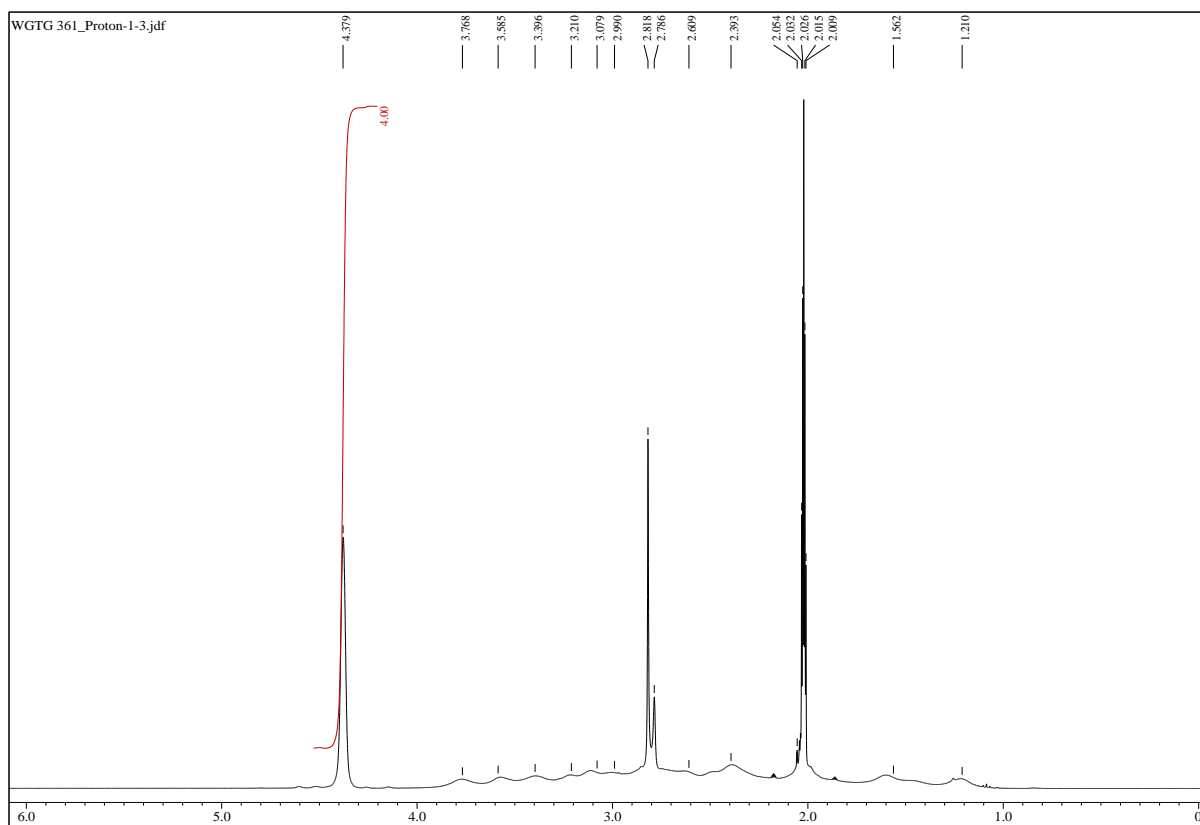

Fig. S62.  $^1\text{H}$  NMR spectrum of  $\text{Cs}[\text{CoSAN-Cl,Br}]$  in  $\text{acetone-}d_6$  (400 MHz).

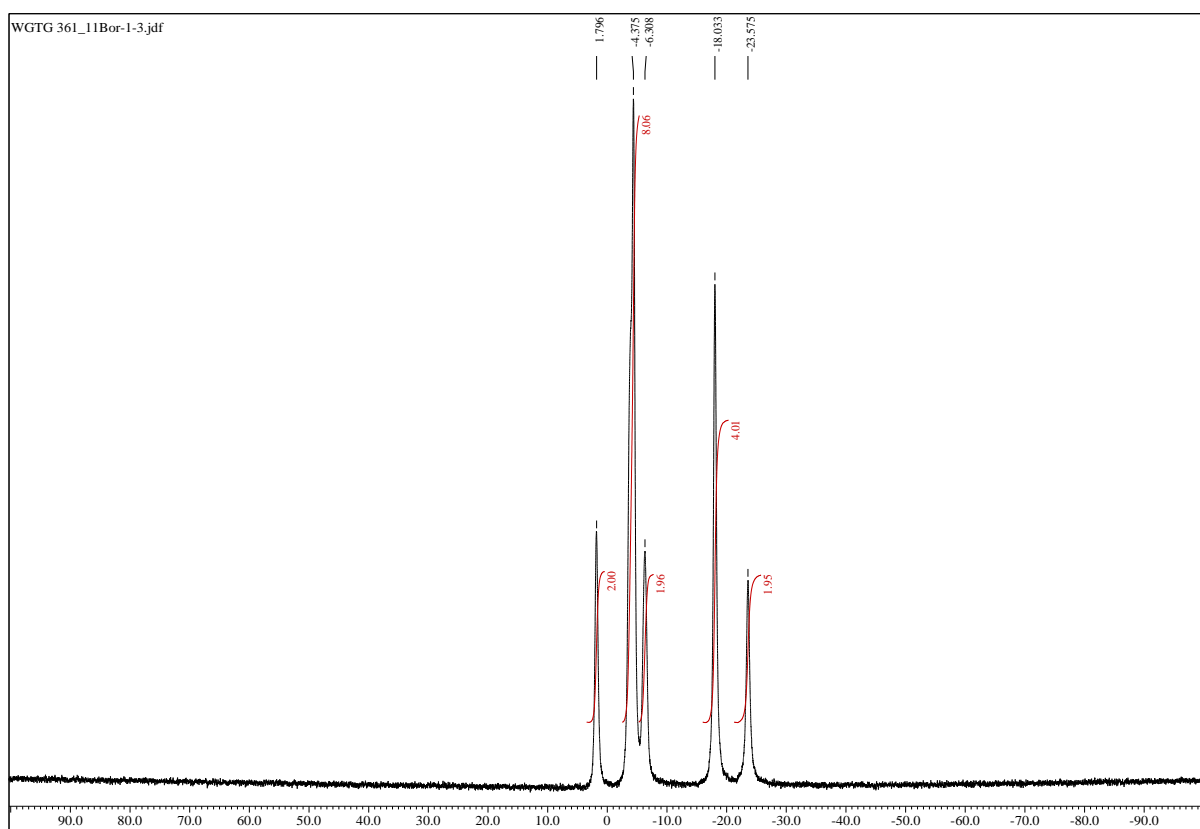

Fig. S63.  $^{11}\text{B}\{^1\text{H}\}$  NMR spectrum of  $\text{Cs}[\text{CoSAN-Cl,Br}]$  in  $\text{acetone-}d_6$  (128 MHz).

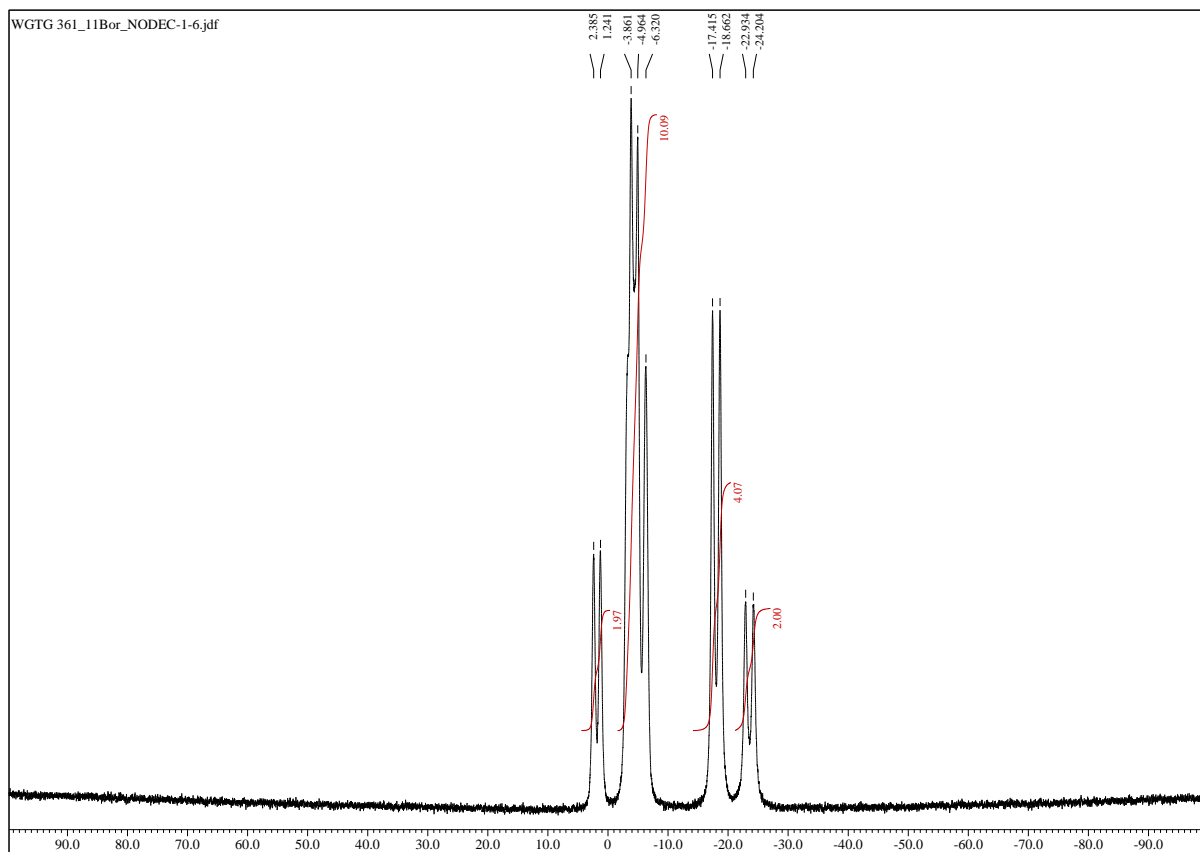

Fig. S64.  $^{11}\text{B}$  NMR spectrum of  $\text{Cs}[\text{CoSAN-Cl,Br}]$  in acetone- $d_6$  (128 MHz).

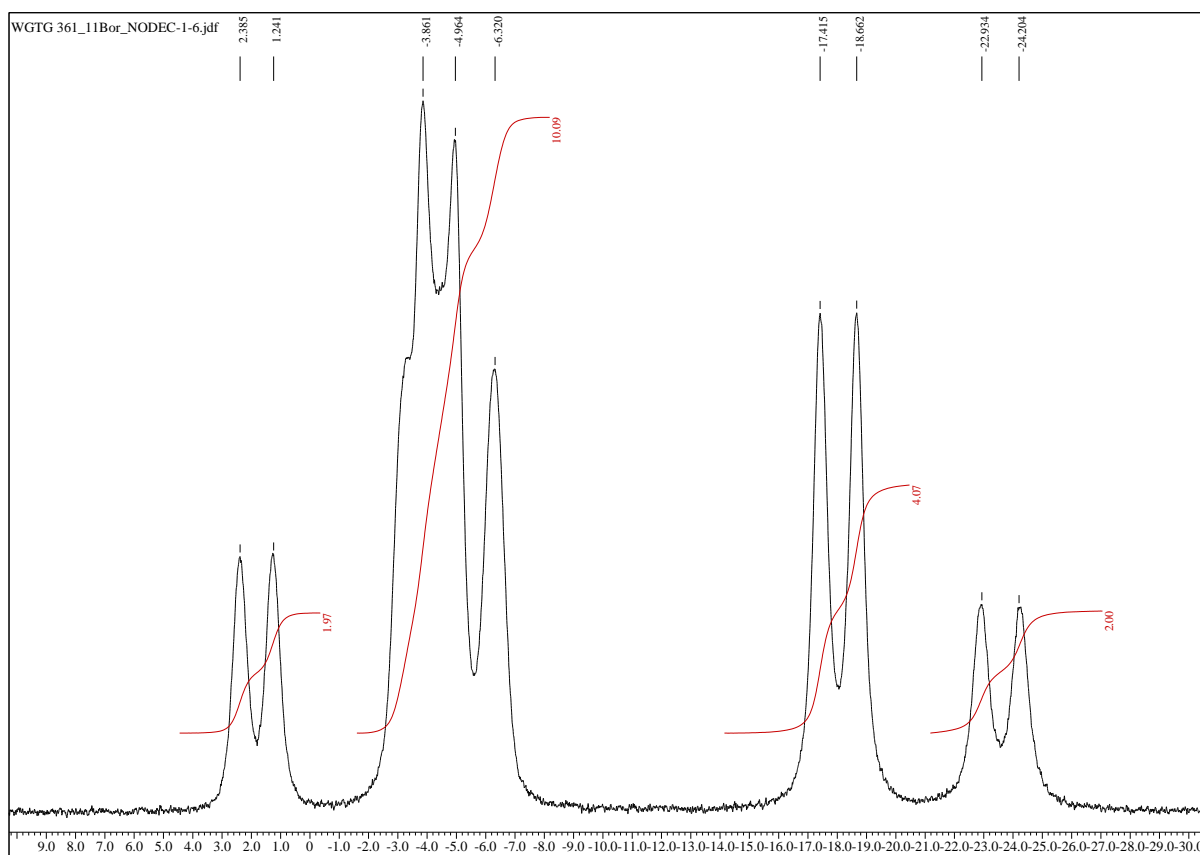

Fig. S65. Expanded  $^{11}\text{B}$  NMR spectrum of  $\text{Cs}[\text{CoSAN-Cl,Br}]$  in acetone- $d_6$  (128 MHz).

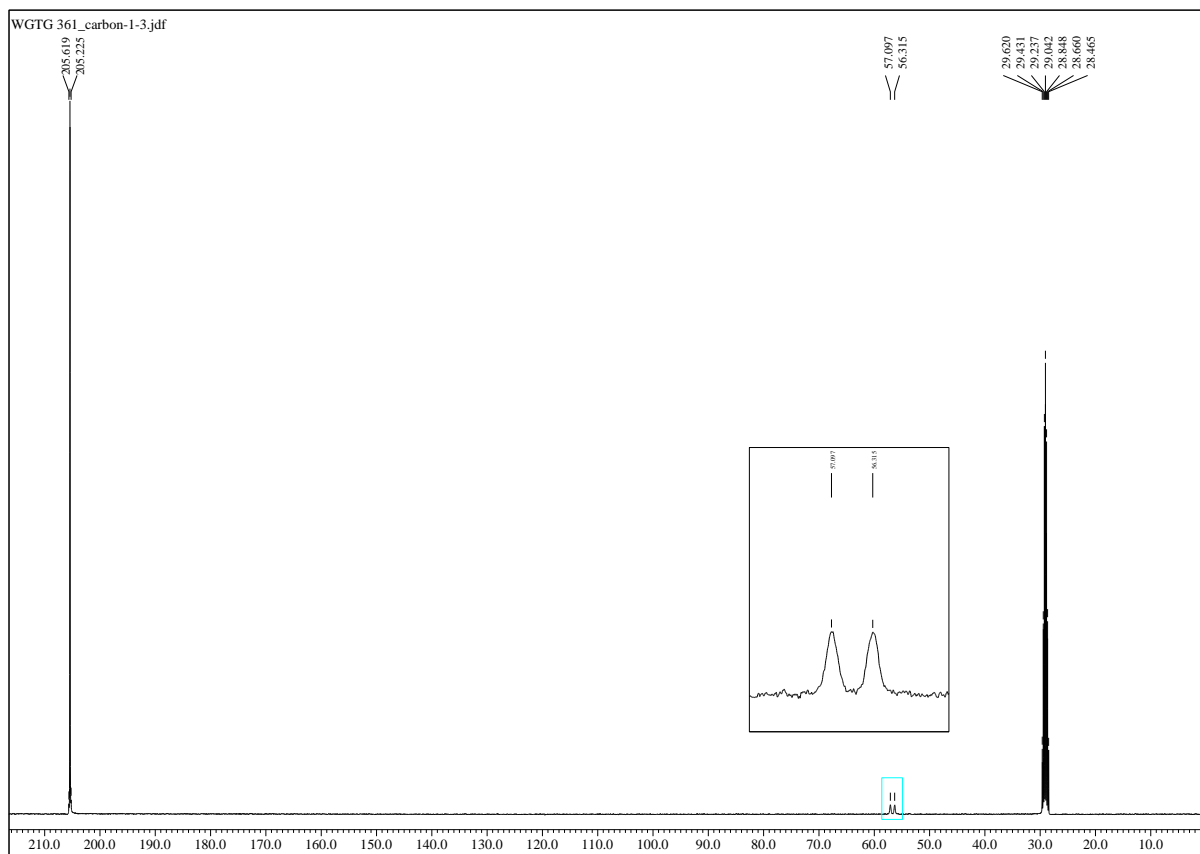

Fig. S66.  $^{13}\text{C}\{^1\text{H}\}$  NMR spectrum of  $\text{Cs}[\text{CoSAN-Cl,Br}]$  in acetone- $d_6$  (100 MHz).

## 1.10 Characterization of [CoSAN-I,Br]<sup>-</sup>

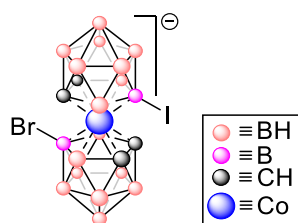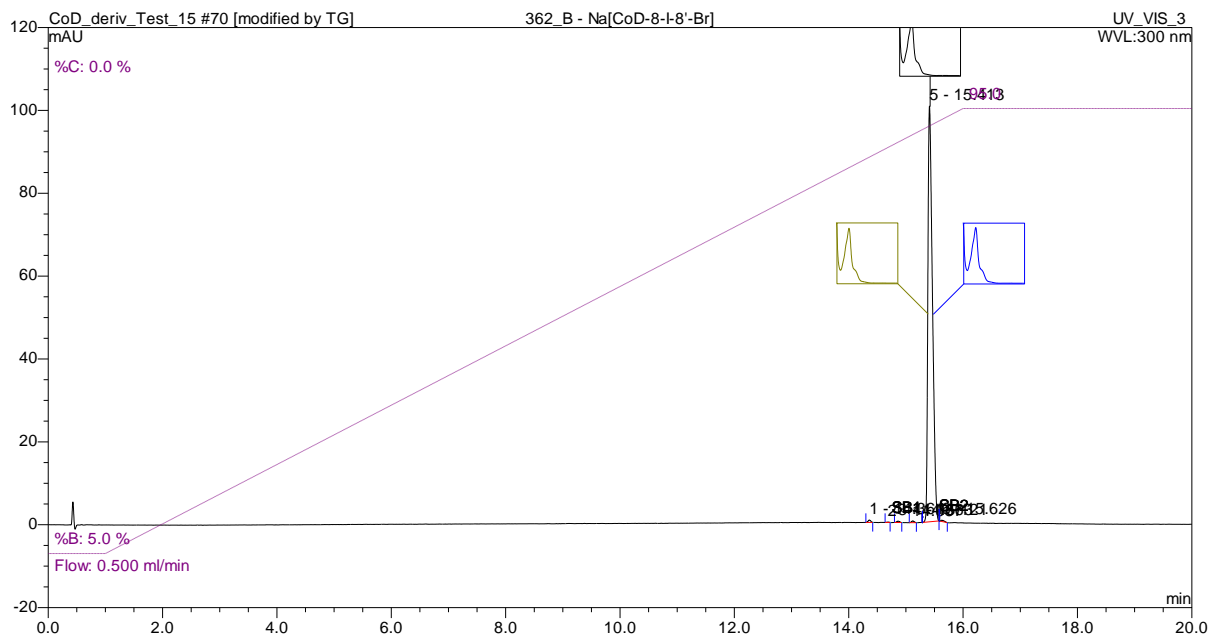

Fig. S67. HPLC chromatogram of [CoSAN-I,Br]<sup>-</sup>. Purity – 98.96%

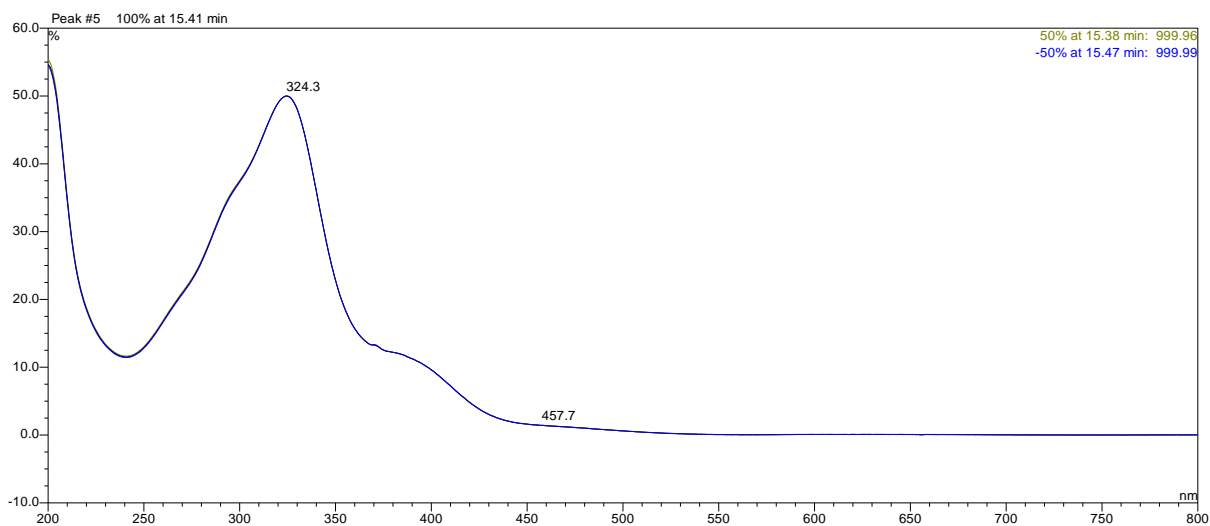

Fig. S68. UV-VIS spectrum of [CoSAN-I,Br]<sup>-</sup> (peak purity analysis).

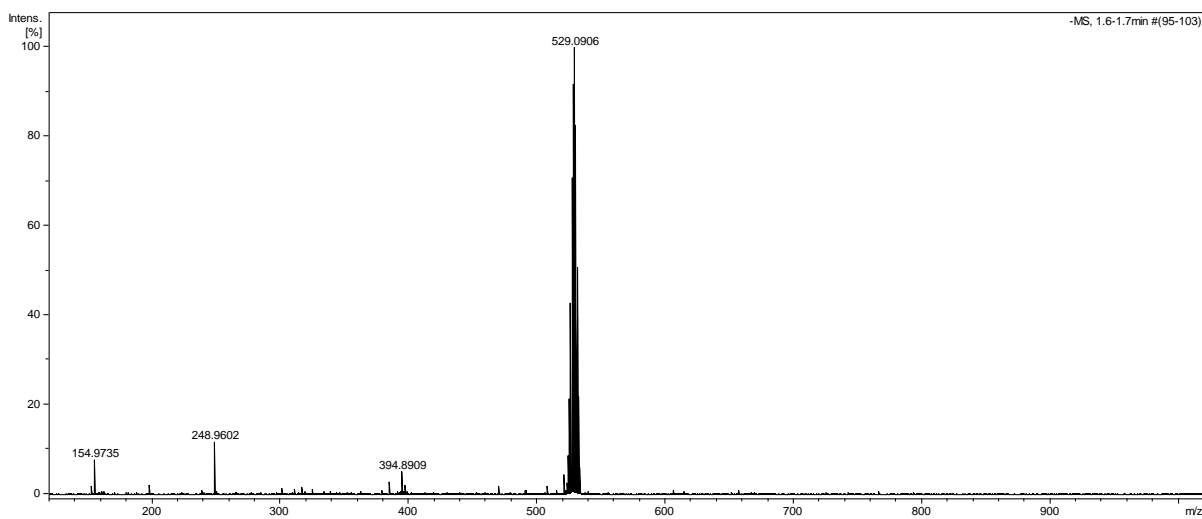

Fig. S69. ESI-MS spectrum of [CoSAN-I,Br].

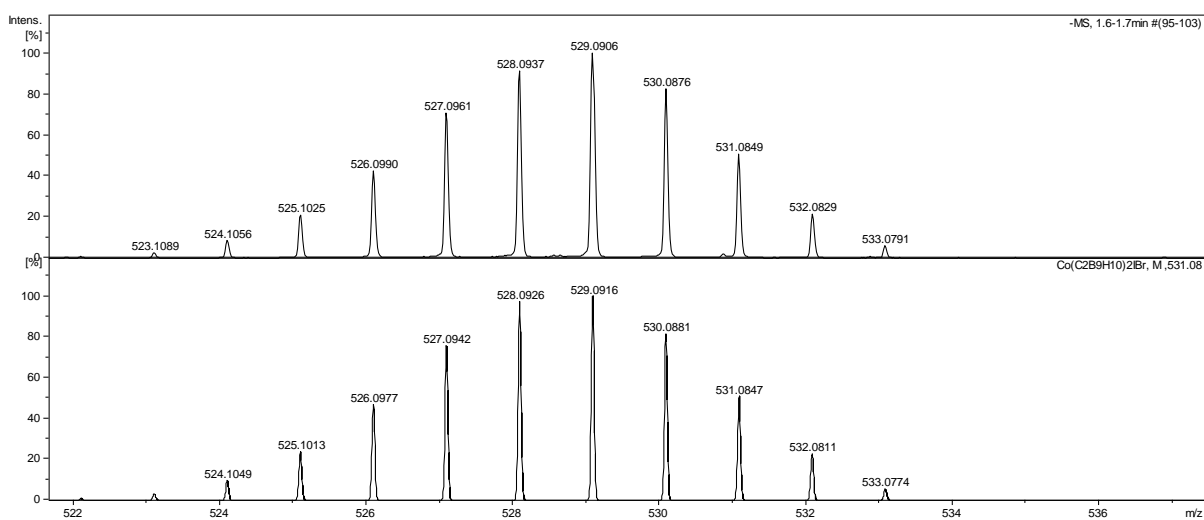

Fig. S70. Measured (top) and simulated (bottom) ESI-MS spectrum of [CoSAN-I,Br] – isotope pattern.

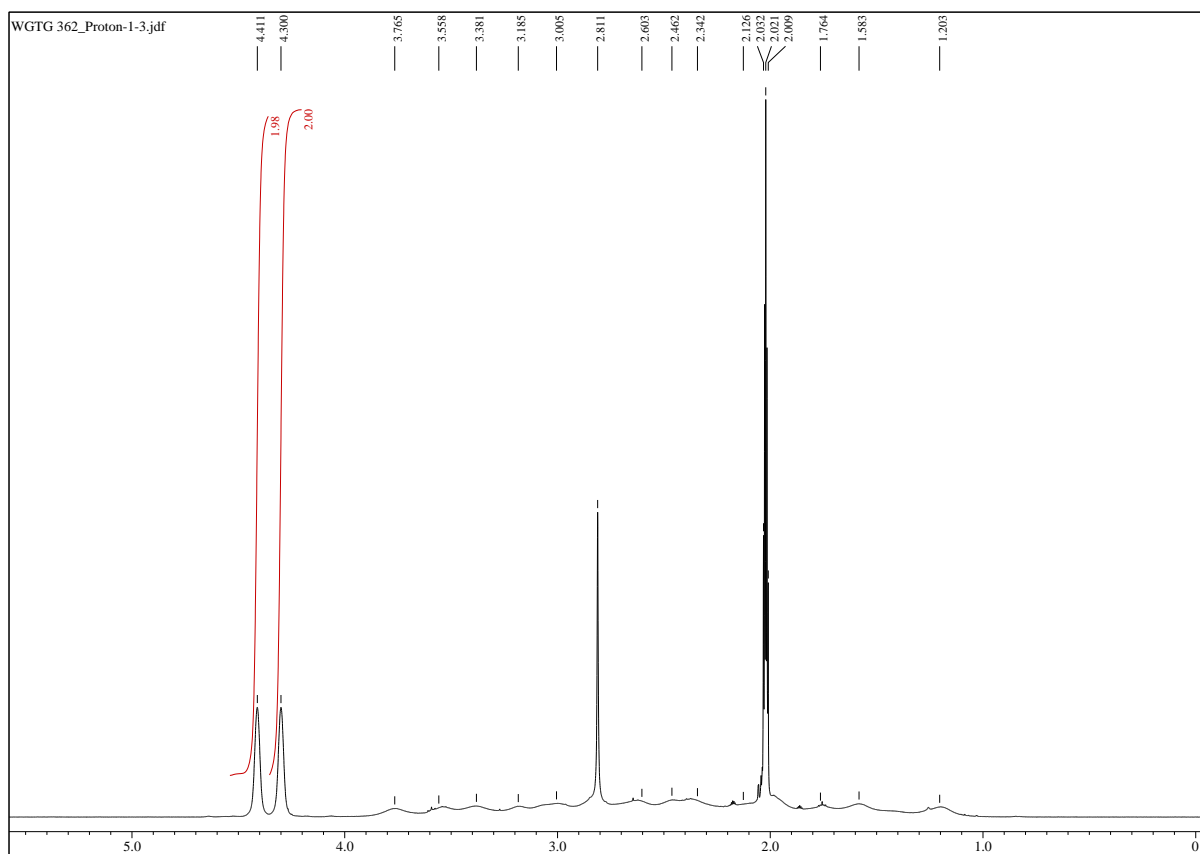

Fig. S71.  $^1\text{H}$  NMR spectrum of  $\text{Cs}[\text{CoSAN-I,Br}]$  in  $\text{acetone-d}_6$  (400 MHz).

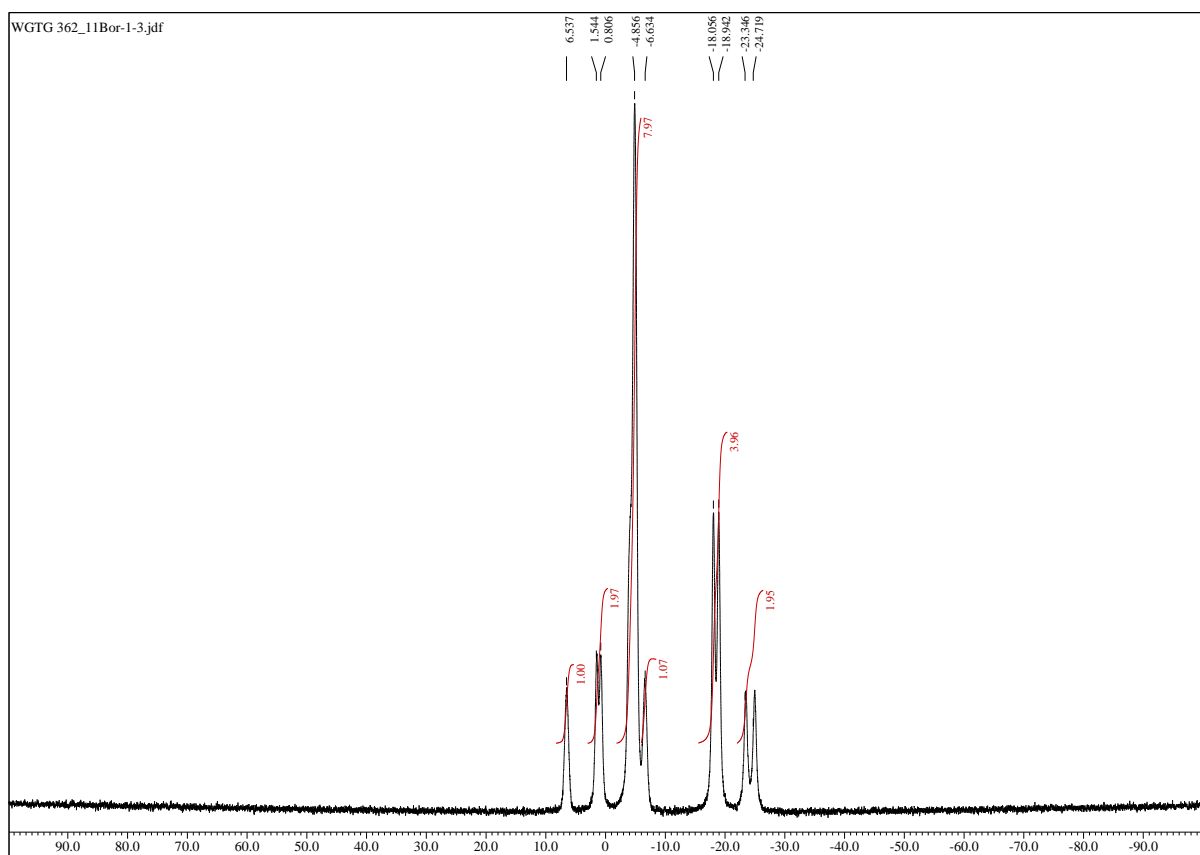

Fig. S72.  $^{11}\text{B}\{^1\text{H}\}$  NMR spectrum of  $\text{Cs}[\text{CoSAN-I,Br}]$  in  $\text{acetone-d}_6$  (128 MHz).

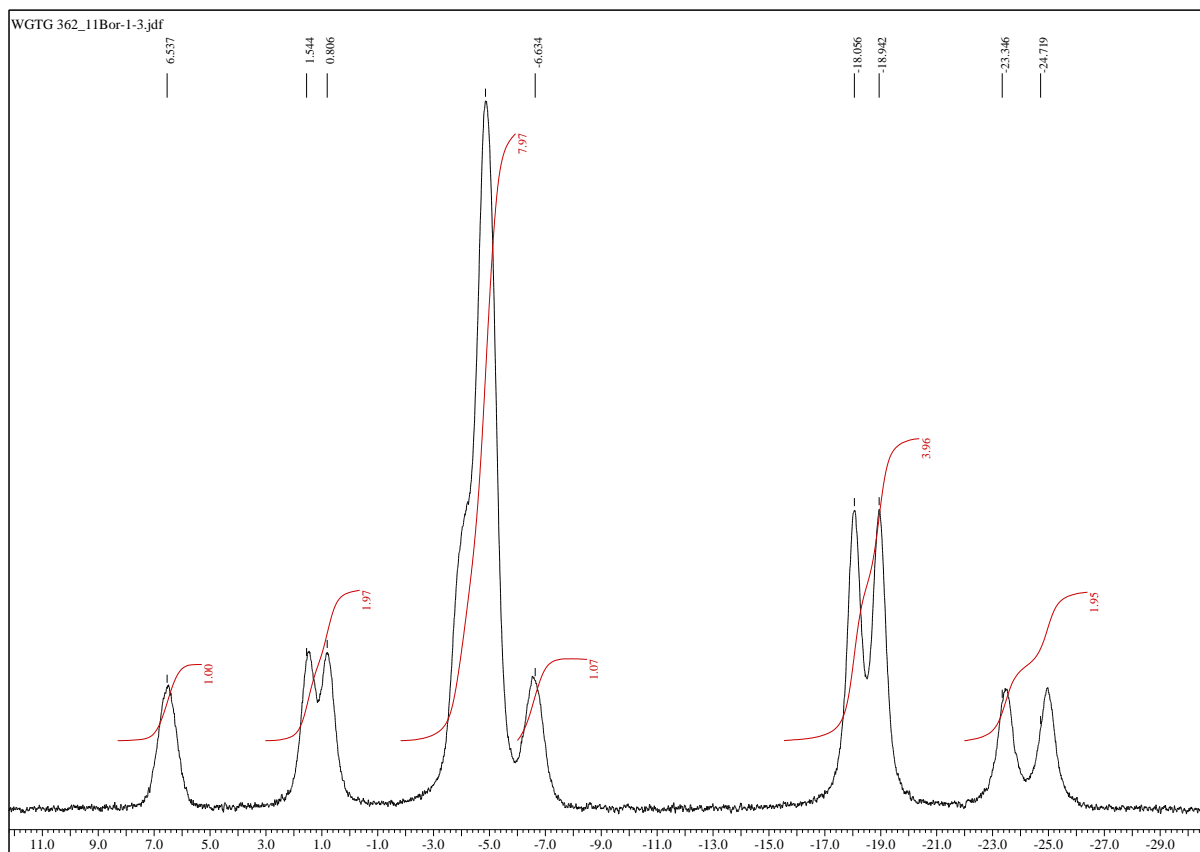

Fig. S73. Expanded  $^{11}\text{B}\{^1\text{H}\}$  NMR spectrum of  $\text{Cs}[\text{CoSAN-I,Br}]$  in acetone- $d_6$  (128 MHz).

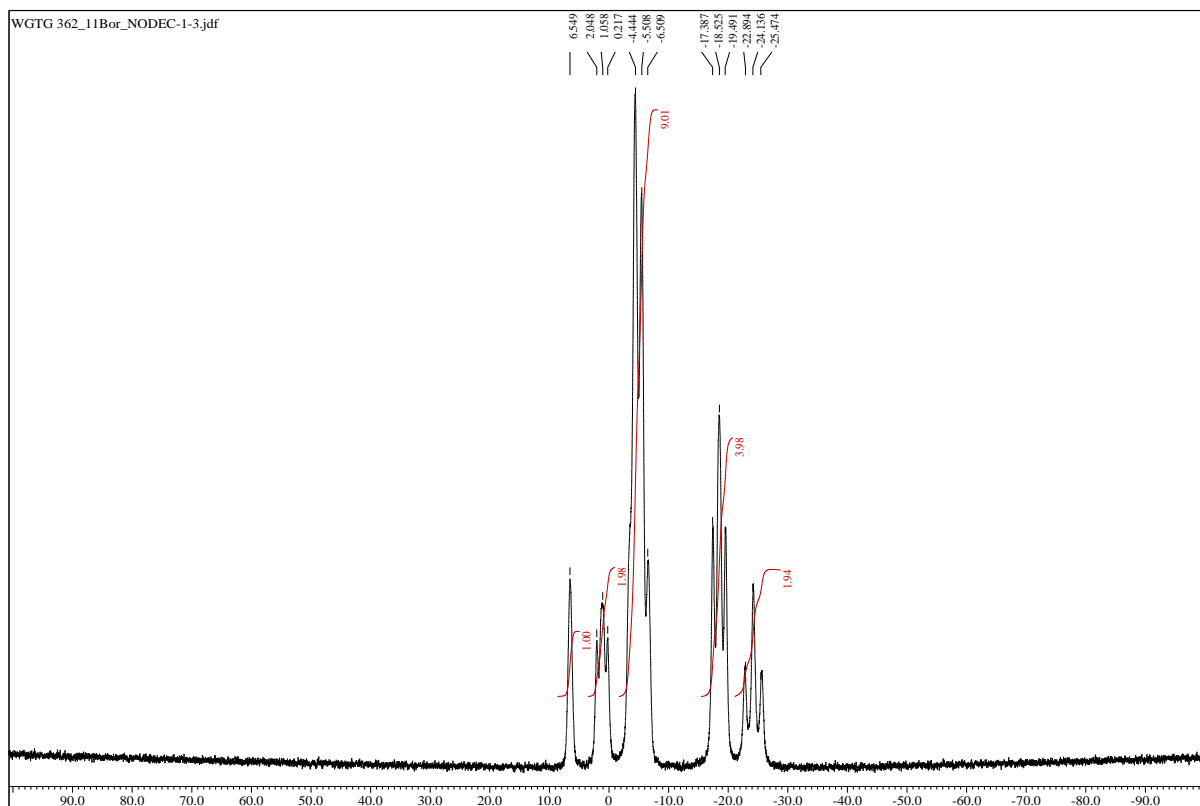

Fig. S74.  $^{11}\text{B}$  NMR spectrum of  $\text{Cs}[\text{CoSAN-I,Br}]$  in acetone- $d_6$  (128 MHz).



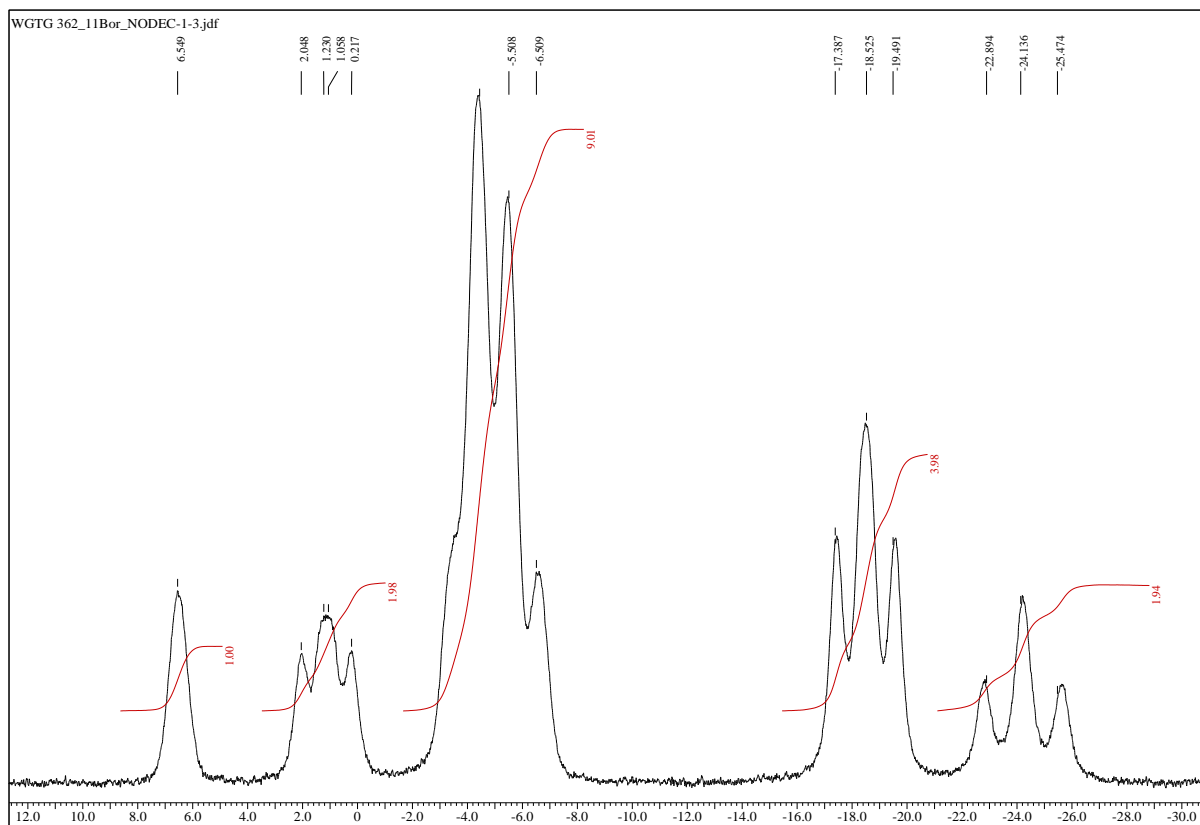

Fig. S75. Expanded  $^{11}\text{B}$  NMR spectrum of  $\text{Cs}[\text{CoSAN-I,Br}]$  in  $\text{acetone-d}_6$  (128 MHz).

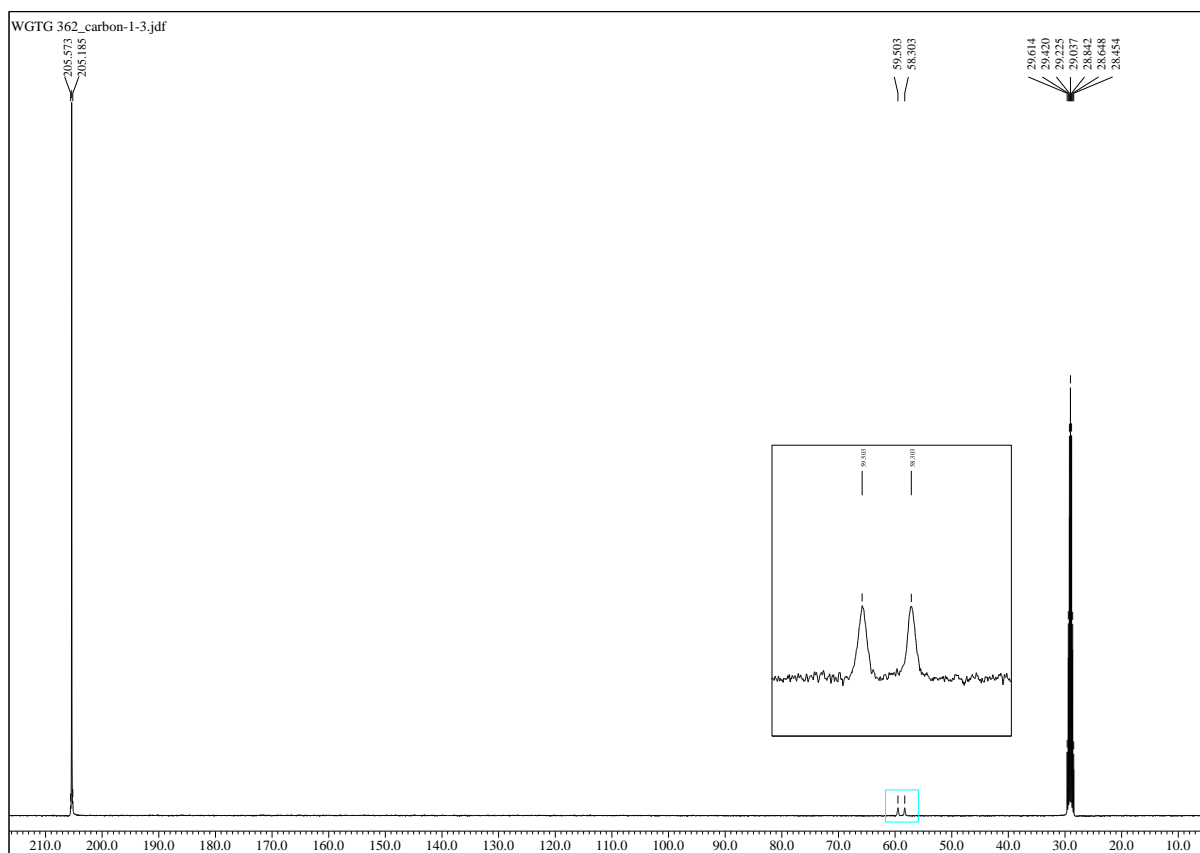

Fig. S76.  $^{13}\text{C}\{^1\text{H}\}$  NMR spectrum of  $\text{Cs}[\text{CoSAN-I,Br}]$  in  $\text{acetone-d}_6$  (100 MHz).

### 1.11 Characterization of [CoSAN-I,Cl]<sup>-</sup>

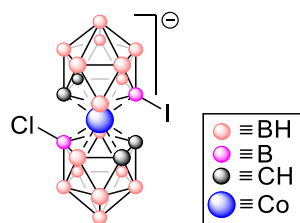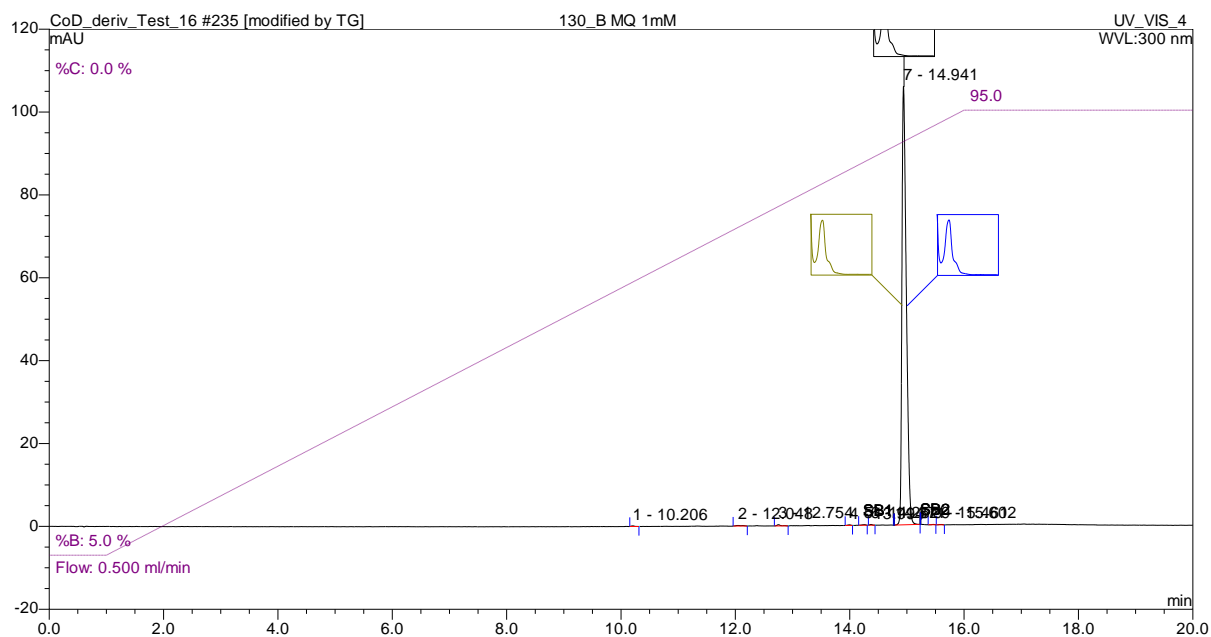

Fig. S77. HPLC chromatogram of [CoSAN-I,Cl]<sup>-</sup>. Purity – 99.07%

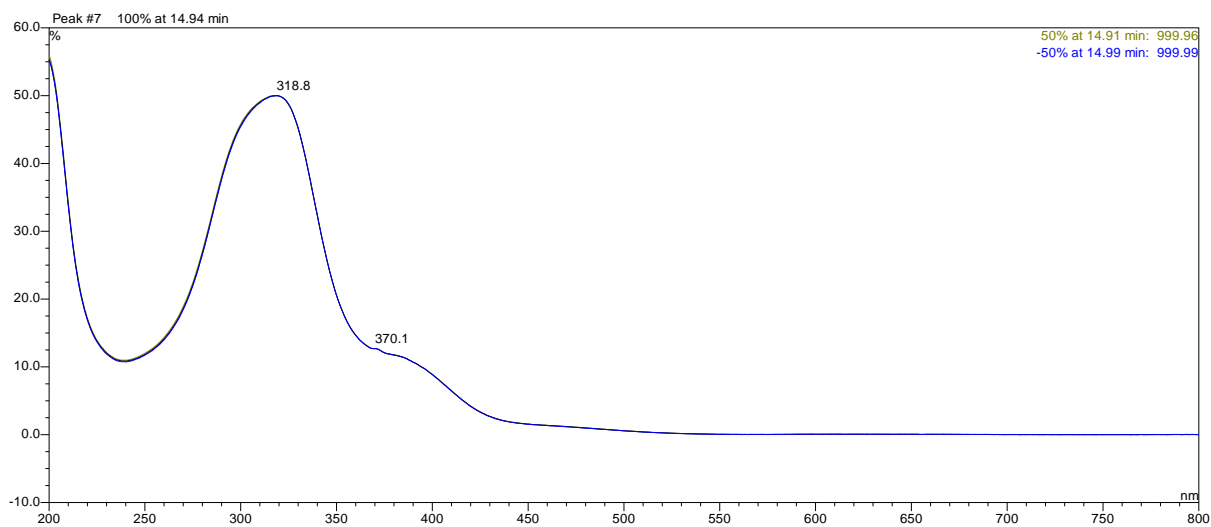

Fig. S78. UV-VIS spectrum of [CoSAN-I,Cl]<sup>-</sup> (peak purity analysis).

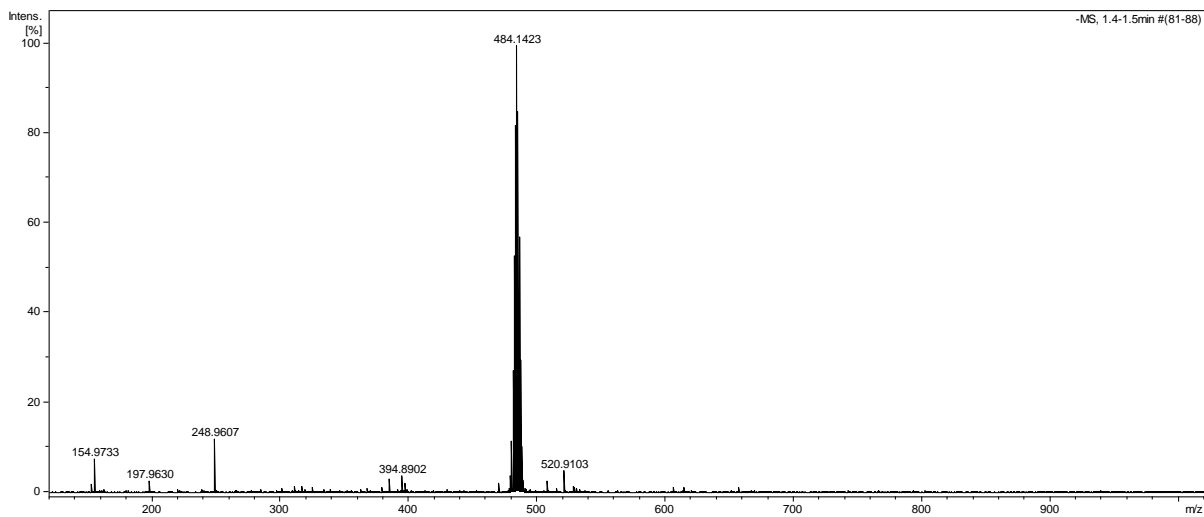

Fig. S79. ESI-MS spectrum of [CoSAN-I,Cl]-.

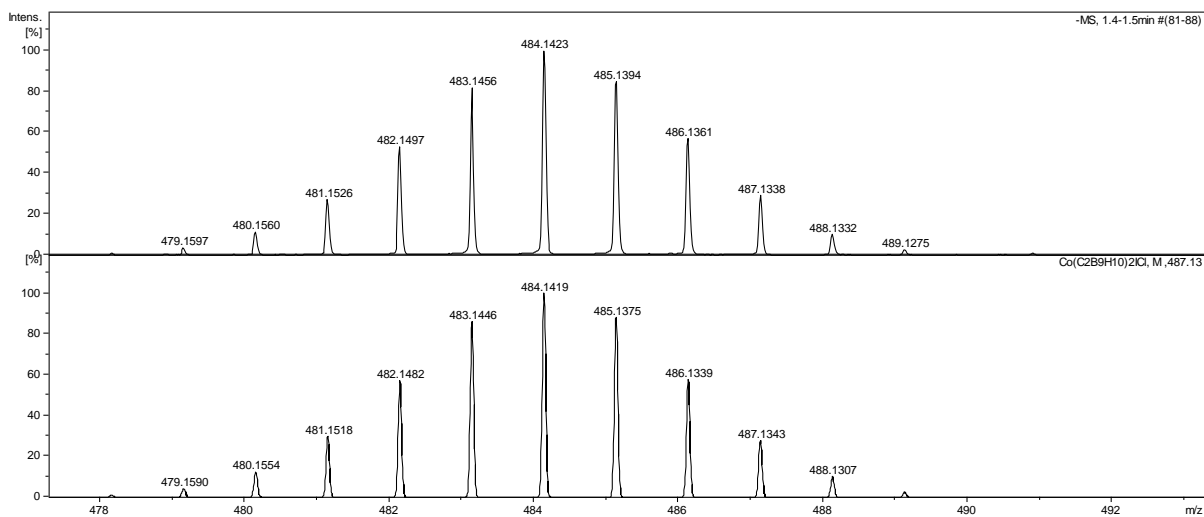

Fig. S80. Measured (top) and simulated (bottom) ESI-MS spectrum of [CoSAN-I,Cl]- – isotope pattern.

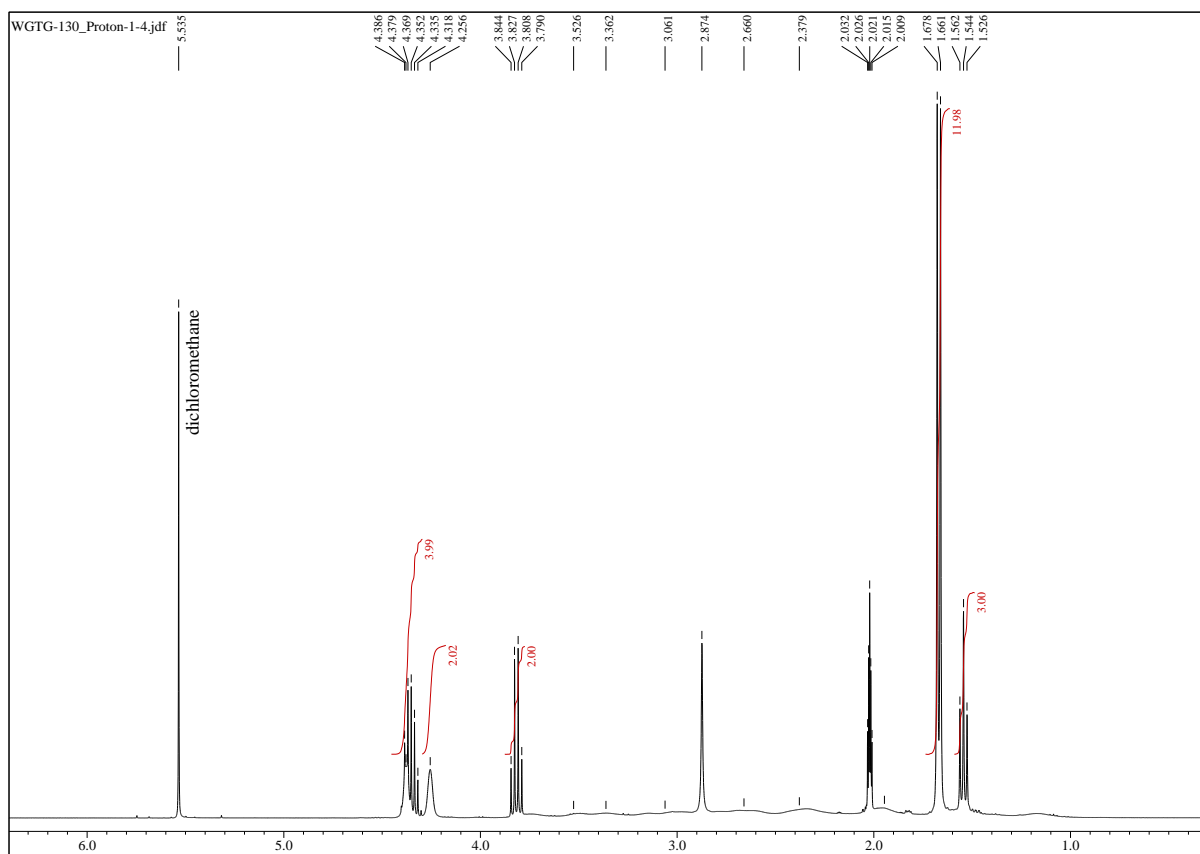

Fig. S81.  $^1\text{H}$  NMR spectrum of  $[\text{CoSAN-I,Cl}] \times [\text{H(DIPEA)}]$  in acetone- $d_6$  (400 MHz).

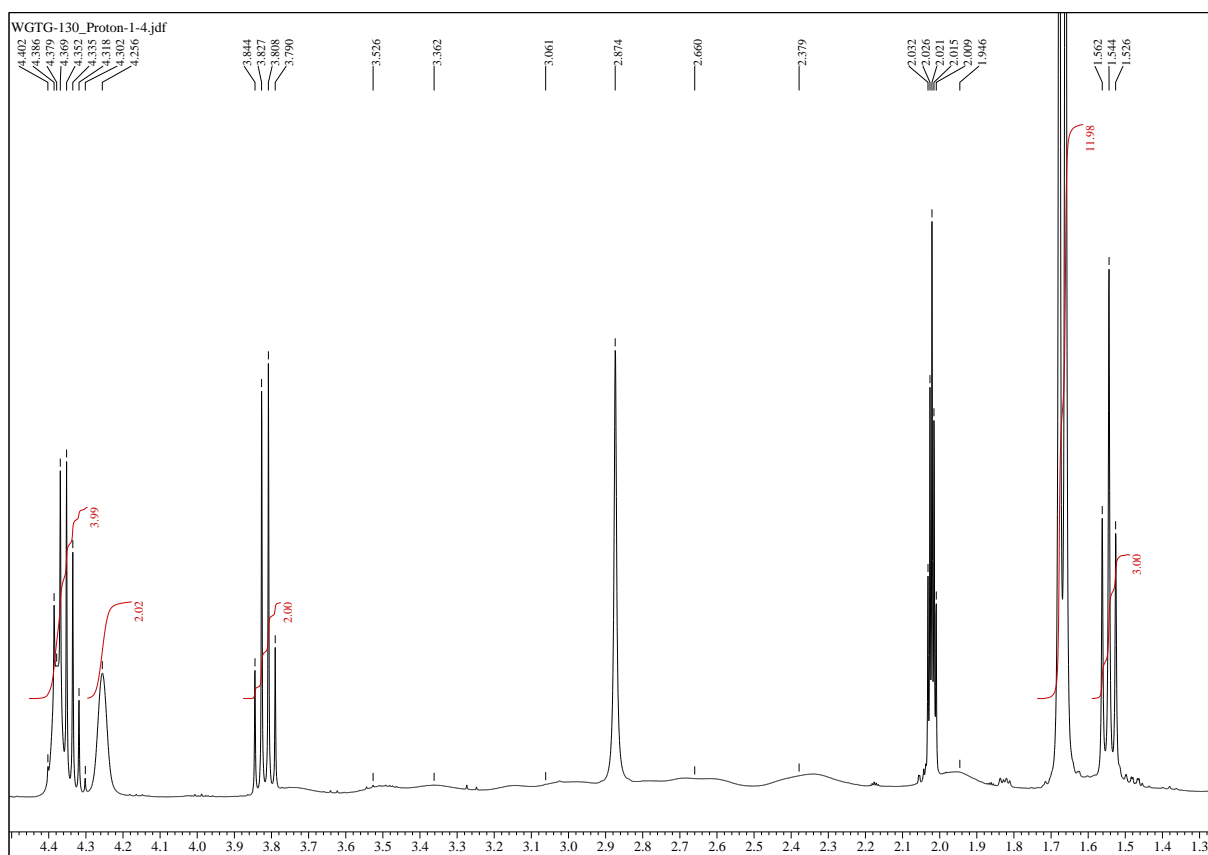

Fig. S82. Expanded  $^1\text{H}$  NMR spectrum of  $[\text{CoSAN-I,Cl}] \times [\text{H(DIPEA)}]$  in acetone- $d_6$  (400 MHz).

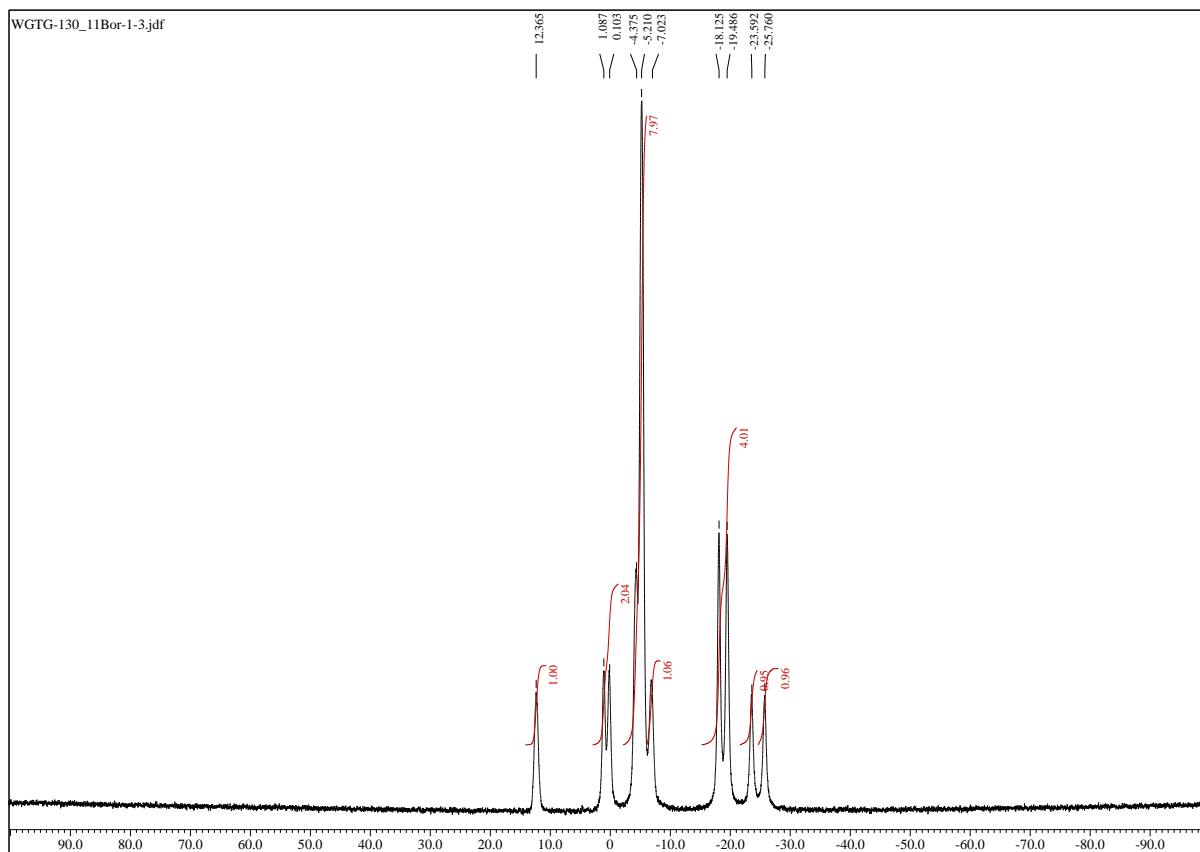

Fig. S83.  $^{11}\text{B}\{^1\text{H}\}$  NMR spectrum of  $[\text{CoSAN-I,Cl}] \times [\text{H(DIPEA)}]$  in acetone- $d_6$  (128 MHz).

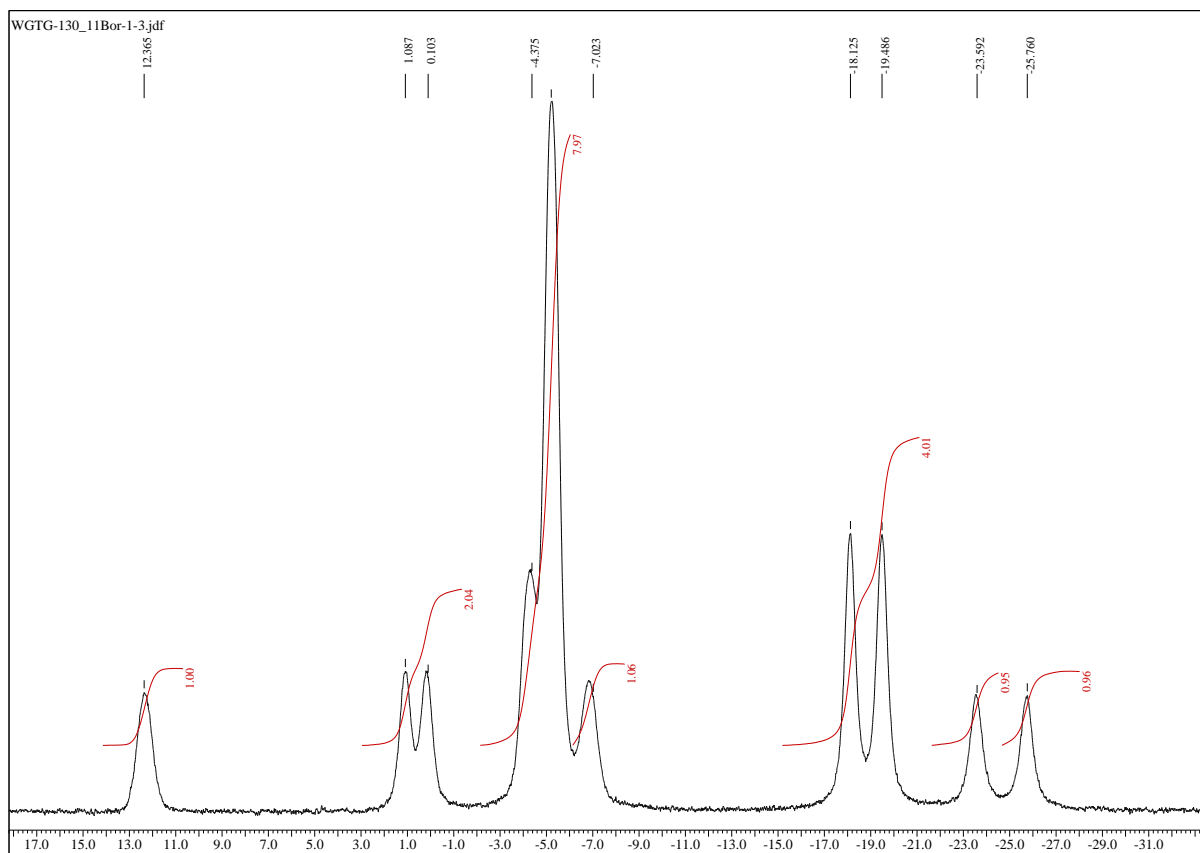

Fig. S84. Expanded  $^{11}\text{B}\{^1\text{H}\}$  NMR spectrum of  $[\text{CoSAN-I,Cl}] \times [\text{H(DIPEA)}]$  in acetone- $d_6$  (128 MHz).

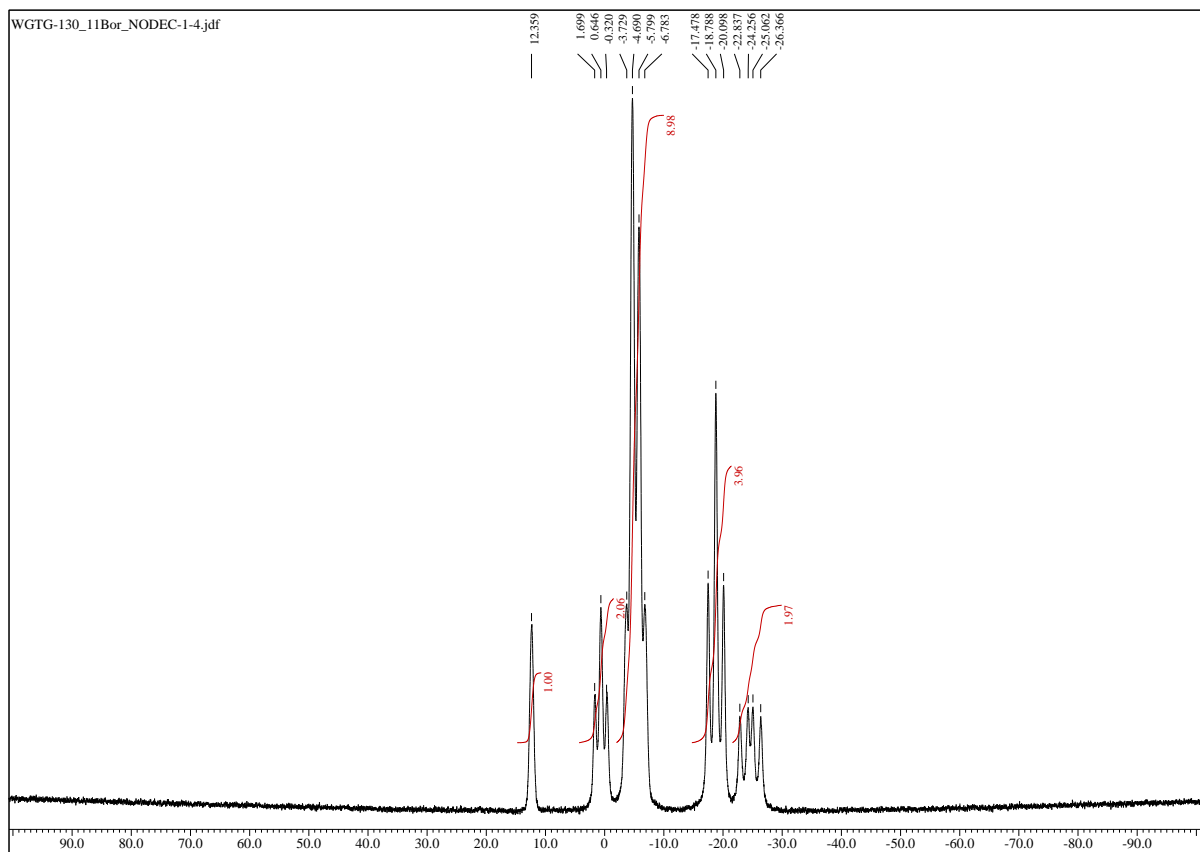

Fig. S85.  $^{11}\text{B}$  NMR spectrum of  $[\text{CoSAN-I,Cl}] \times [\text{H(DIPEA)}]$  in acetone- $d_6$  (128 MHz).

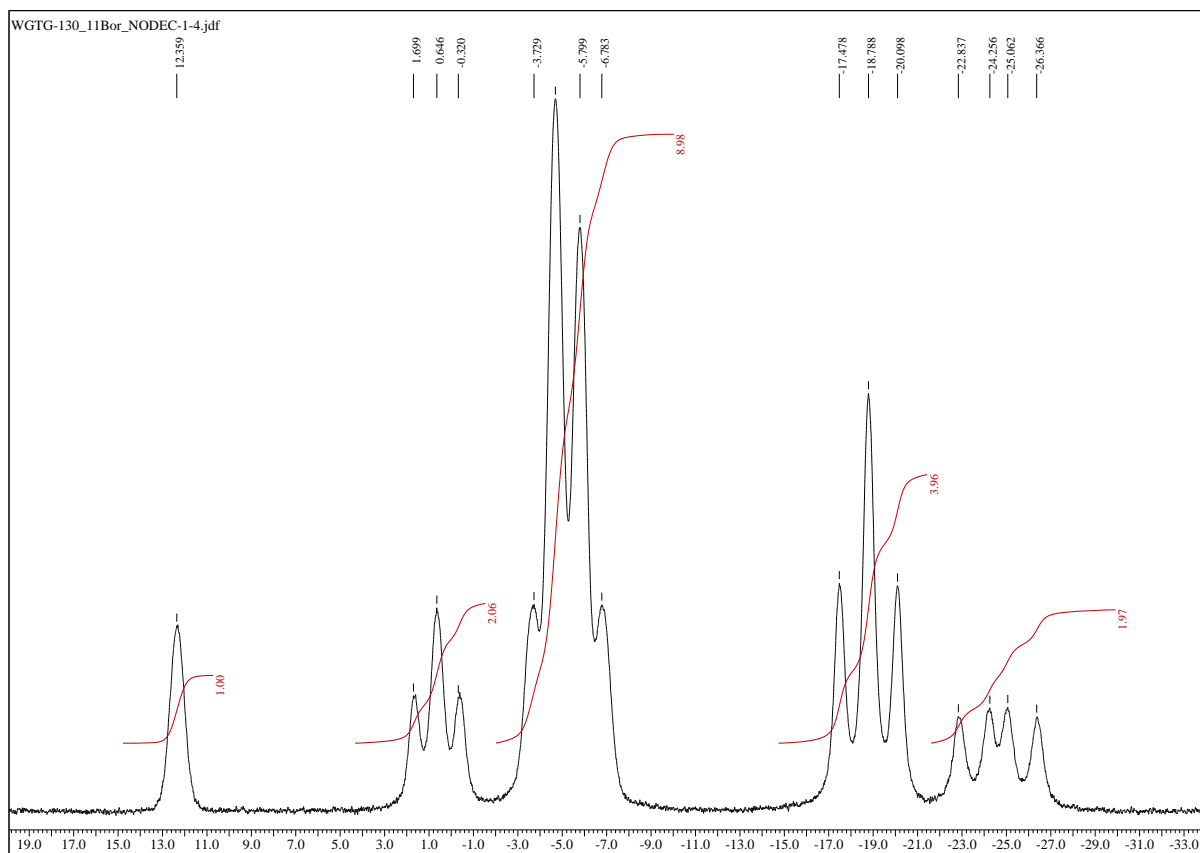

Fig. S86. Expanded  $^{11}\text{B}$  NMR spectrum of  $[\text{CoSAN-I,Cl}] \times [\text{H(DIPEA)}]$  in acetone- $d_6$  (128 MHz).

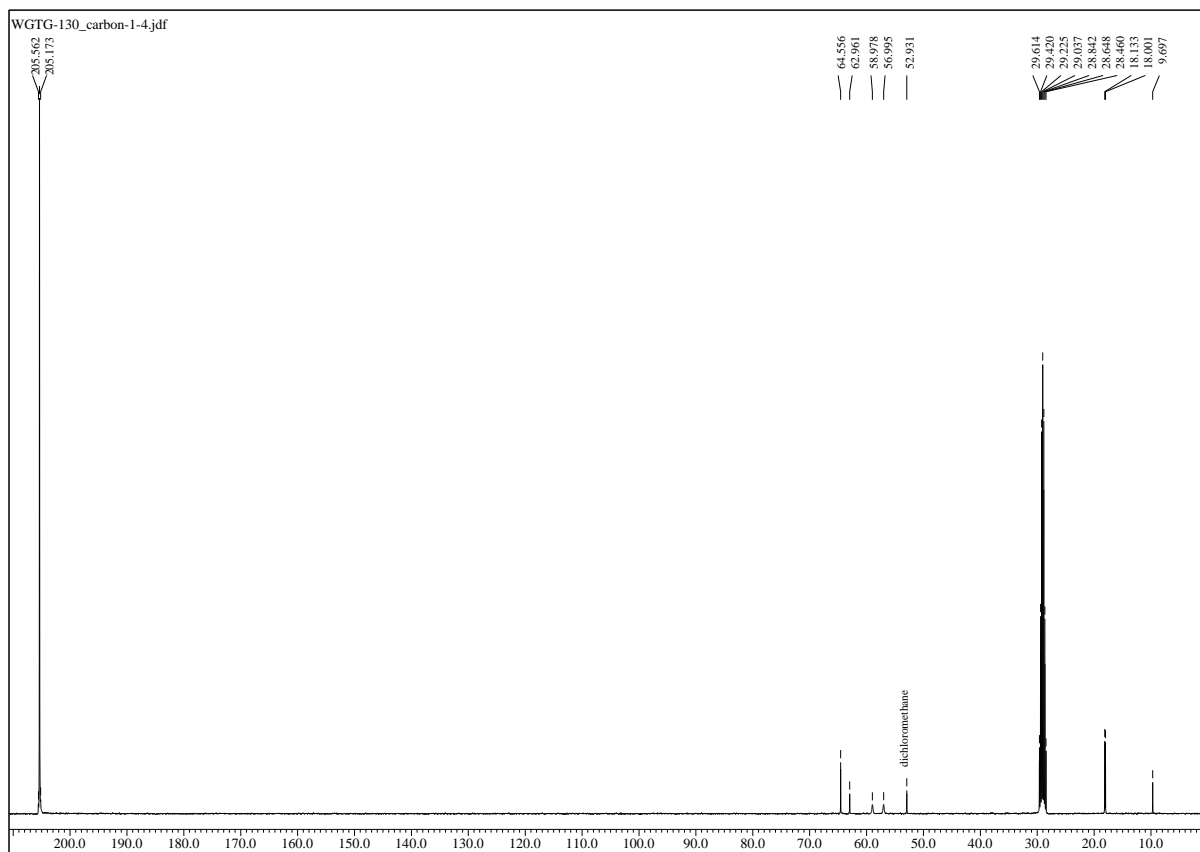

Fig. S87.  $^{13}\text{C}\{^1\text{H}\}$  NMR spectrum of  $[\text{CoSAN-I,Cl}] \times [\text{H(DIPEA)}]$  in acetone- $\text{d}_6$  (100 MHz).

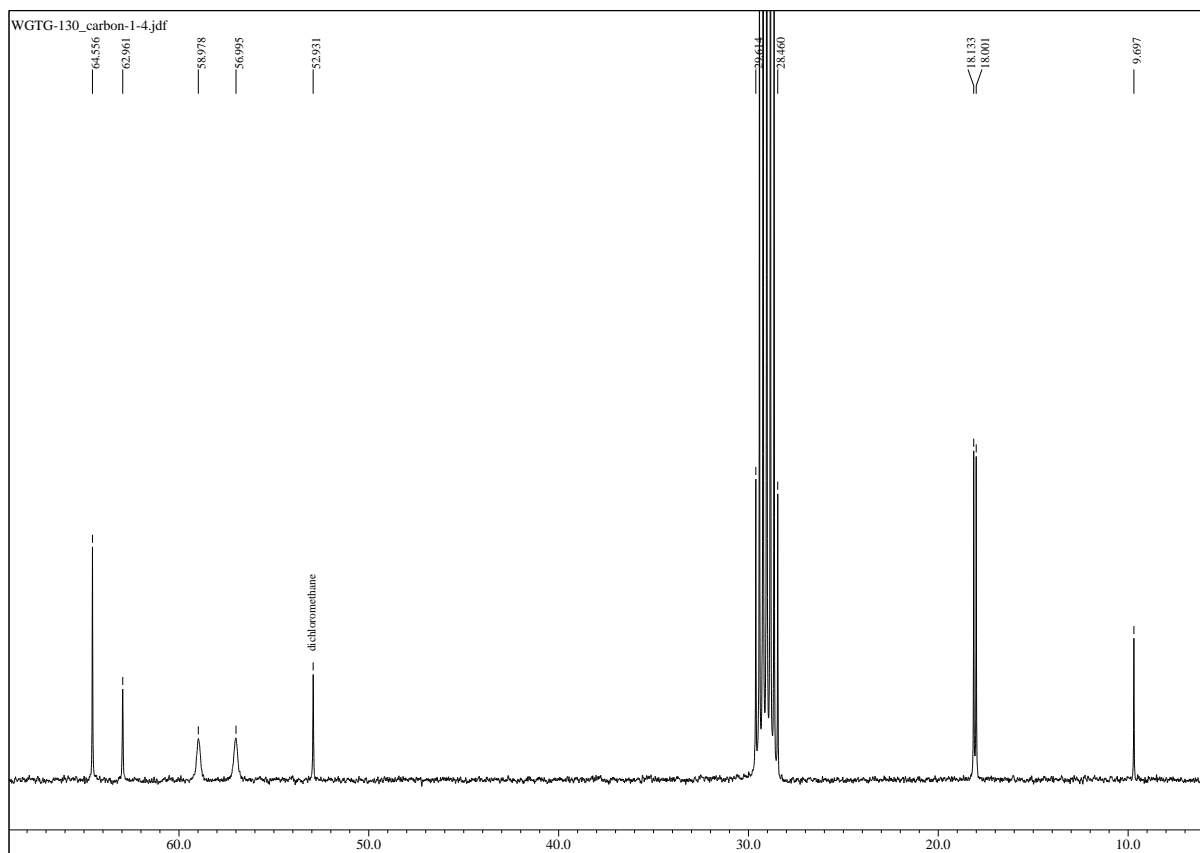

Fig. S88. Expanded  $^{13}\text{C}\{^1\text{H}\}$  NMR spectrum of  $[\text{CoSAN-I,Cl}] \times [\text{H(DIPEA)}]$  in acetone- $\text{d}_6$  (100 MHz).

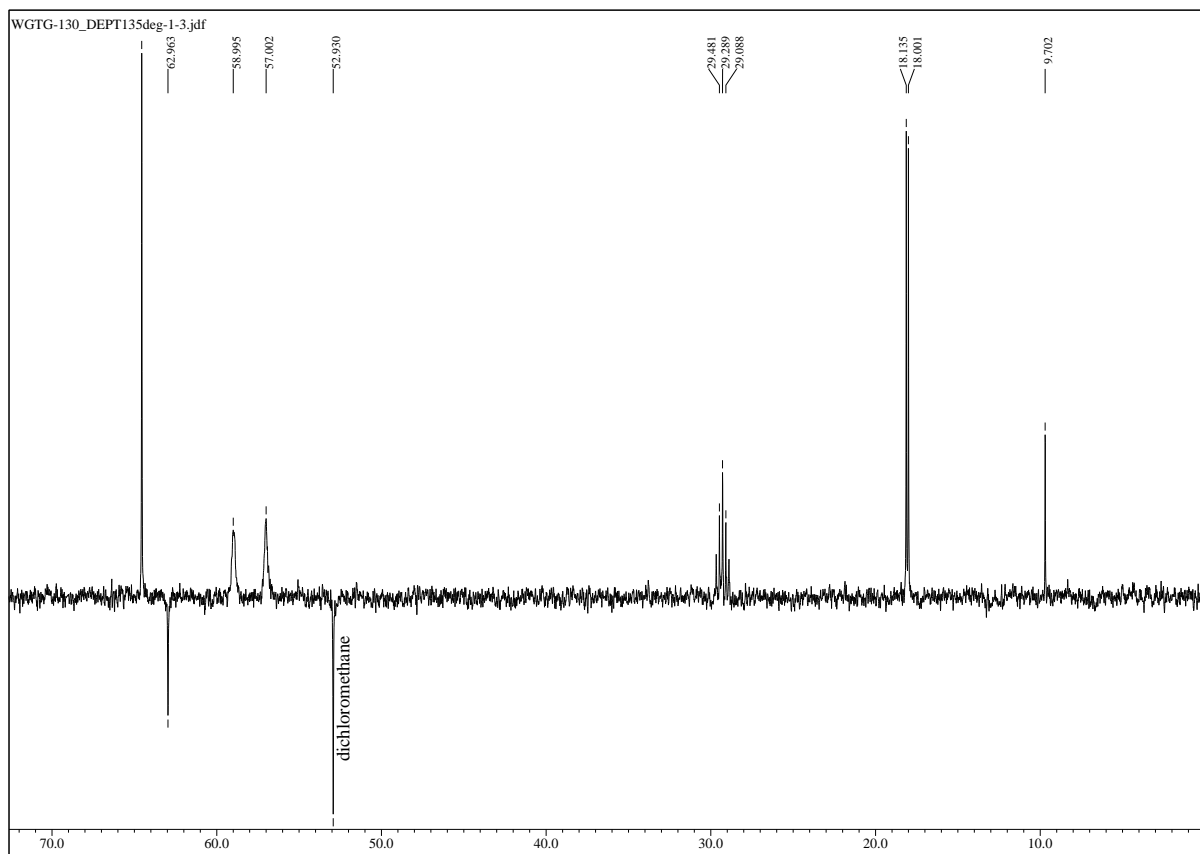

Fig. S89. DEPT 135 spectrum of  $[CoSAN-I,Cl] \times [H(DIPEA)]$  in acetone- $d_6$  (100 MHz).



## 2. Single Crystal X-Ray Diffraction Data

Tab. S1. SCXRD selected experimental and refinement details of examined compounds at 295 K.

| Compound                                                                                                       | Cs[CoSAN]                           | Cs[CoSAN-I <sub>2</sub> ]         | Cs[CoSAN-I]                         | Cs[CoSAN-Br,Cl]                       | Cs[CoSAN-I,Br]                      | Cs[CoSAN-I,Cl]                      |
|----------------------------------------------------------------------------------------------------------------|-------------------------------------|-----------------------------------|-------------------------------------|---------------------------------------|-------------------------------------|-------------------------------------|
| <b>Crystal data</b>                                                                                            |                                     |                                   |                                     |                                       |                                     |                                     |
| Crystal system, space group                                                                                    | Monoclinic, <i>P2<sub>1</sub>/c</i> | Monoclinic, <i>C2/c</i>           | Monoclinic, <i>P2<sub>1</sub>/n</i> | Orthorhombic, <i>Pna2<sub>1</sub></i> | Monoclinic, <i>P2<sub>1</sub>/n</i> | Monoclinic, <i>P2<sub>1</sub>/n</i> |
| <i>M<sub>r</sub></i>                                                                                           | 456.63                              | 708.42                            | 582.53                              | 569.98                                | 661.43                              | 616.97                              |
| <i>a, b, c</i> (Å)                                                                                             | 6.963 (3), 12.215 (4), 21.505 (6)   | 18.987 (5), 8.871 (3), 12.529 (4) | 7.469 (3), 13.177 (4), 20.735 (6)   | 19.994 (5), 6.847 (3), 14.381 (4)     | 6.802 (3), 14.587 (4), 10.462 (4)   | 6.795 (3), 14.507 (4), 10.395 (4)   |
| $\alpha, \beta, \gamma$ (°)                                                                                    | 90, 98.49 (3), 90                   | 90, 91.78 (3), 90                 | 90, 95.05 (3), 90                   | 90, 90, 90                            | 90, 100.34 (3), 90                  | 90, 99.64 (3), 90                   |
| <i>V</i> (Å <sup>3</sup> )                                                                                     | 1809.1 (11)                         | 2109.2 (11)                       | 2032.8 (12)                         | 1968.7 (11)                           | 1021.2 (7)                          | 1010.2 (7)                          |
| <i>Z</i>                                                                                                       | 4                                   | 4                                 | 4                                   | 4                                     | 2                                   | 2                                   |
| $\mu$ (mm <sup>-1</sup> )                                                                                      | 2.91                                | 5.43                              | 4.11                                | 4.85                                  | 6.05                                | 4.27                                |
| Crystal size (mm)                                                                                              | 0.23 × 0.15 × 0.06                  | 0.22 × 0.16 × 0.1                 | 0.15 × 0.14 × 0.07                  | 0.25 × 0.16 × 0.04                    | 0.24 × 0.16 × 0.03                  | 0.21 × 0.09 × 0.07                  |
| <b>Data collection</b>                                                                                         |                                     |                                   |                                     |                                       |                                     |                                     |
| <i>T<sub>min</sub>, T<sub>max</sub></i>                                                                        | 0.791, 1.000                        | 0.813, 1.000                      | 0.933, 1.000                        | 0.621, 1.000                          | 0.568, 1.000                        | 0.845, 1.000                        |
| No. of measured, independent and observed [ <i>I</i> > 2σ( <i>I</i> )] reflections                             | 50568, 3695, 3274                   | 41858, 2154, 2057                 | 9242, 4144, 3234                    | 76187, 4021, 3810                     | 40896, 2096, 1896                   | 20251, 2059, 1876                   |
| <i>R<sub>int</sub></i>                                                                                         | 0.031                               | 0.022                             | 0.042                               | 0.038                                 | 0.038                               | 0.030                               |
| (sin $\vartheta/\lambda$ ) <sub>max</sub> (Å <sup>-1</sup> )                                                   | 0.625                               | 0.625                             | 0.625                               | 0.625                                 | 0.625                               | 0.625                               |
| <b>Refinement</b>                                                                                              |                                     |                                   |                                     |                                       |                                     |                                     |
| <i>R</i> [ <i>F</i> <sup>2</sup> > 2σ( <i>F</i> <sup>2</sup> )], <i>wR</i> ( <i>F</i> <sup>2</sup> ), <i>S</i> | 0.022, 0.052, 1.03                  | 0.016, 0.038, 1.11                | 0.035, 0.077, 1.05                  | 0.023, 0.056, 1.03                    | 0.025, 0.054, 1.16                  | 0.059, 0.124, 1.35                  |
| No. of reflections                                                                                             | 3695                                | 2154                              | 4144                                | 4021                                  | 2096                                | 2059                                |
| No. of parameters                                                                                              | 217                                 | 120                               | 226                                 | 236                                   | 121                                 | 121                                 |
| No. of restraints                                                                                              | 0                                   | 0                                 | 0                                   | 1                                     | 0                                   | 0                                   |
| $\Delta\rho_{\max}, \Delta\rho_{\min}$ (e Å <sup>-3</sup> )                                                    | 0.93, -0.52                         | 0.71, -0.75                       | 0.69, -0.79                         | 0.48, -0.48                           | 0.83, -0.76                         | 0.92, -1.06                         |
| Absolute structure parameter                                                                                   | –                                   | –                                 | –                                   | 0.56 (2)                              | –                                   | –                                   |

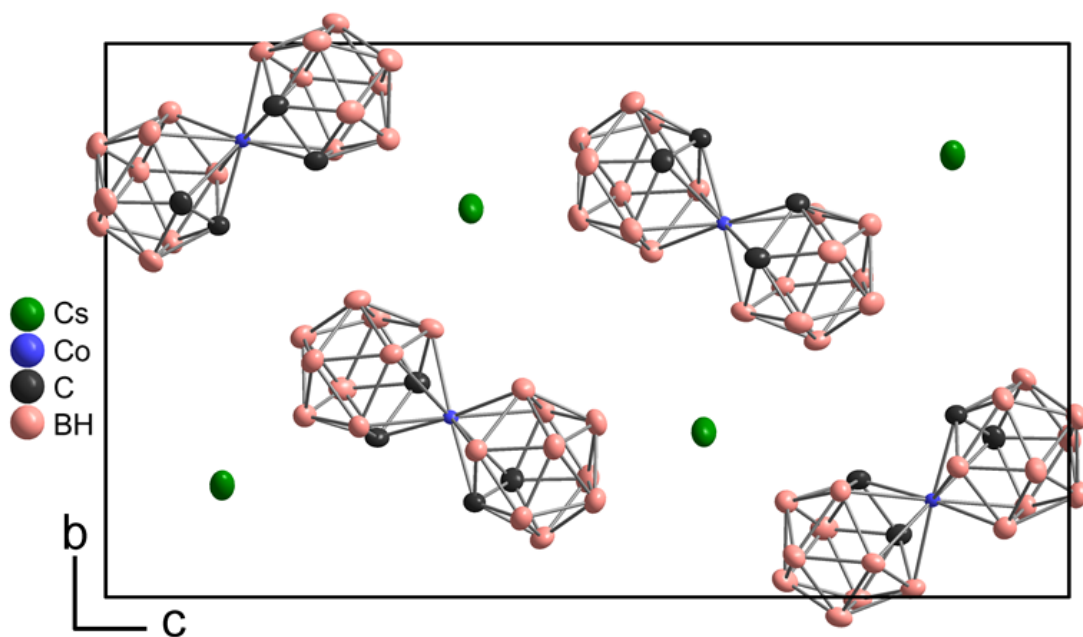

Fig. S90. Unit cell representation of Cs[CoSAN] in  $P2_1/c$ .

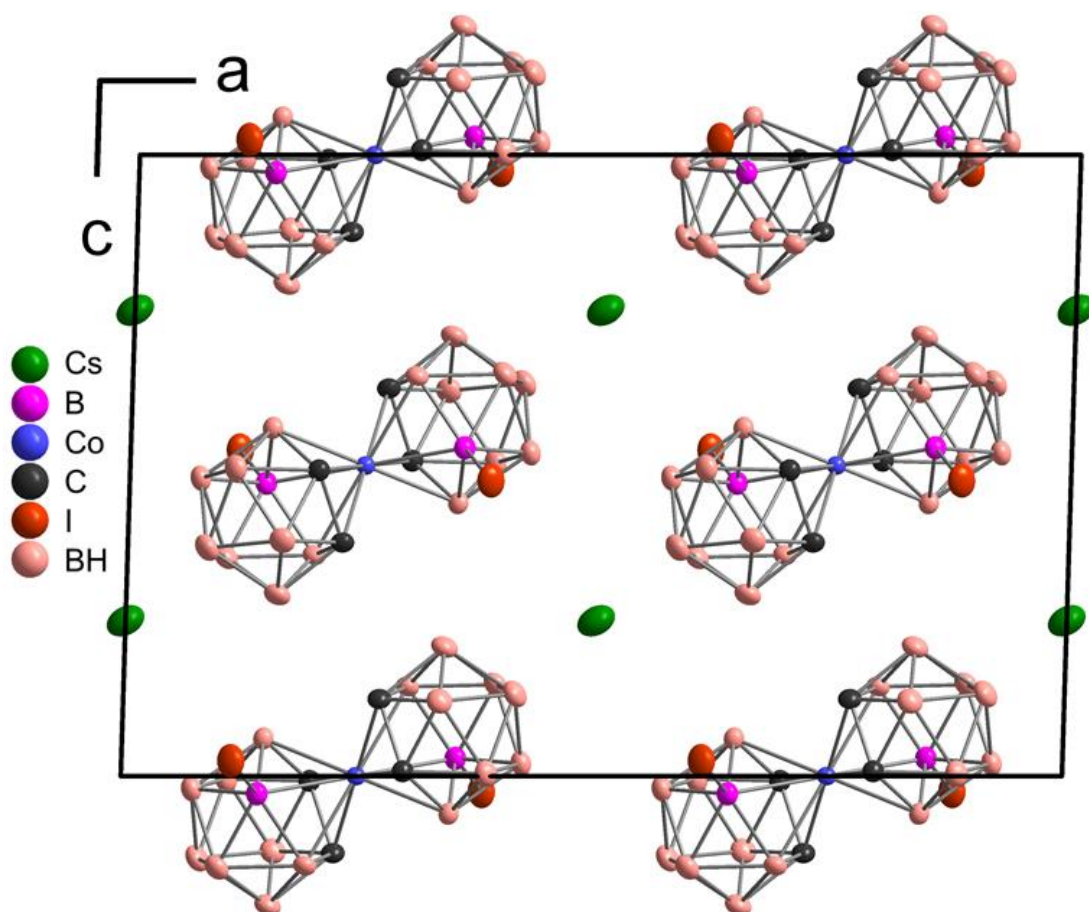

Fig. S91. Unit cell representation of Cs[CoSAN-I<sub>2</sub>] in  $C2/c$ .

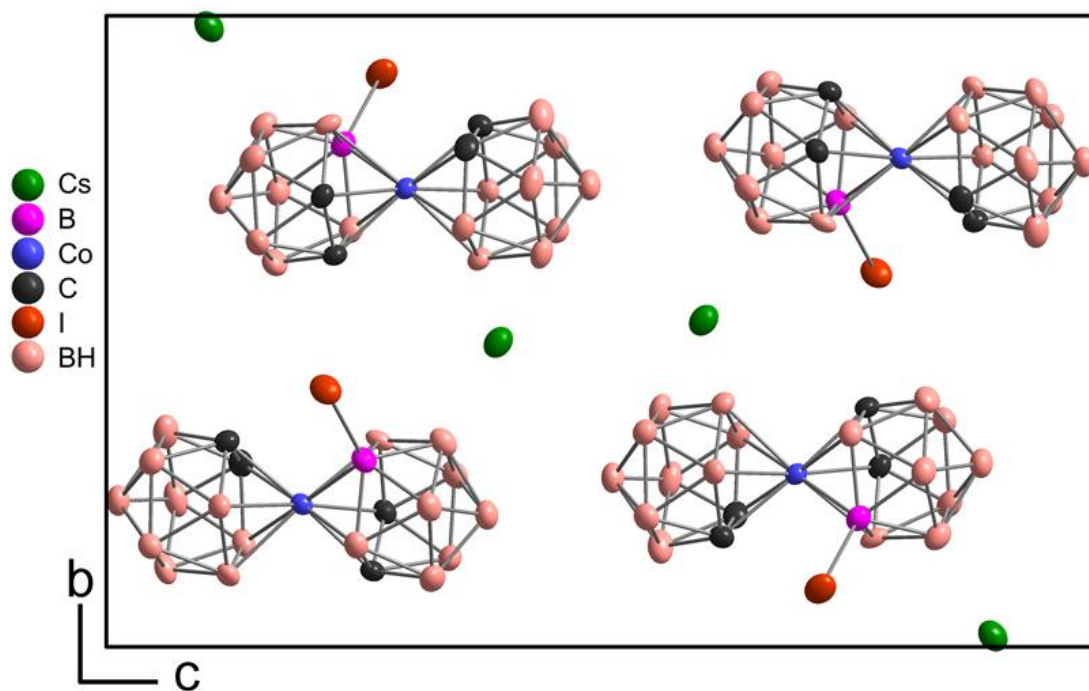

Fig. S92. Unit cell representation of Cs[CoSAN-I] in  $P2_1/n$ .

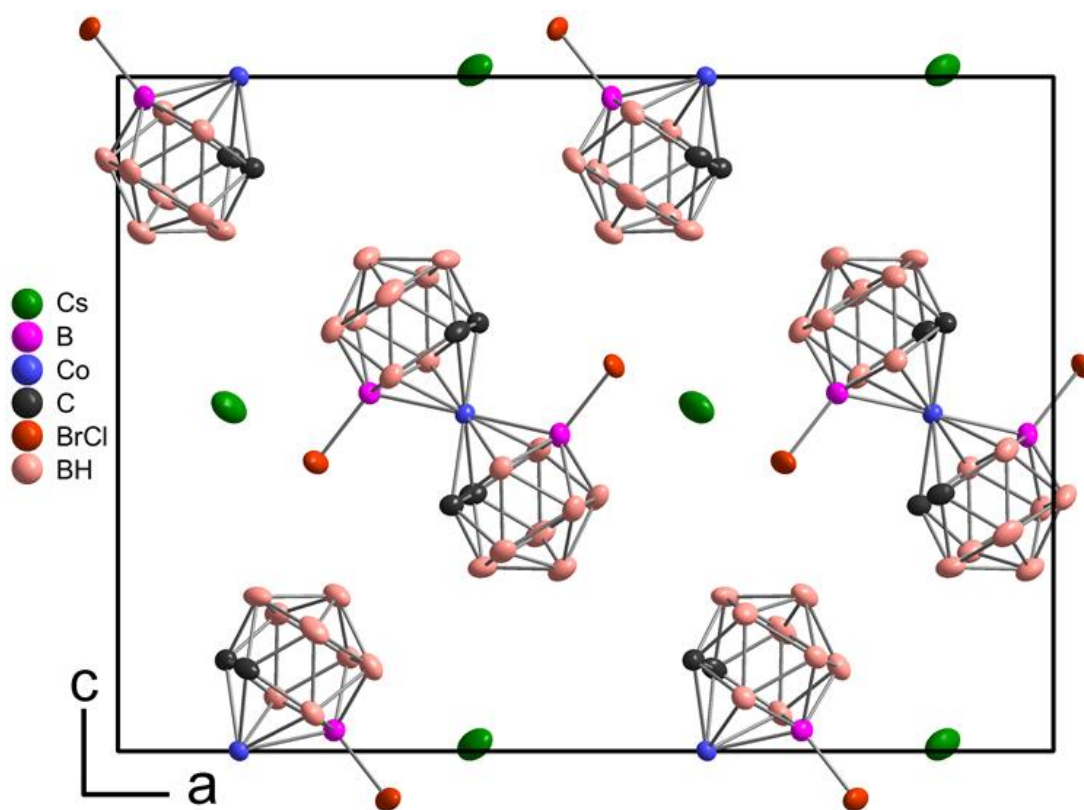

Fig. S93. Unit cell representation of Cs[CoSAN-Cl,Br] in  $Pna2_1$ .

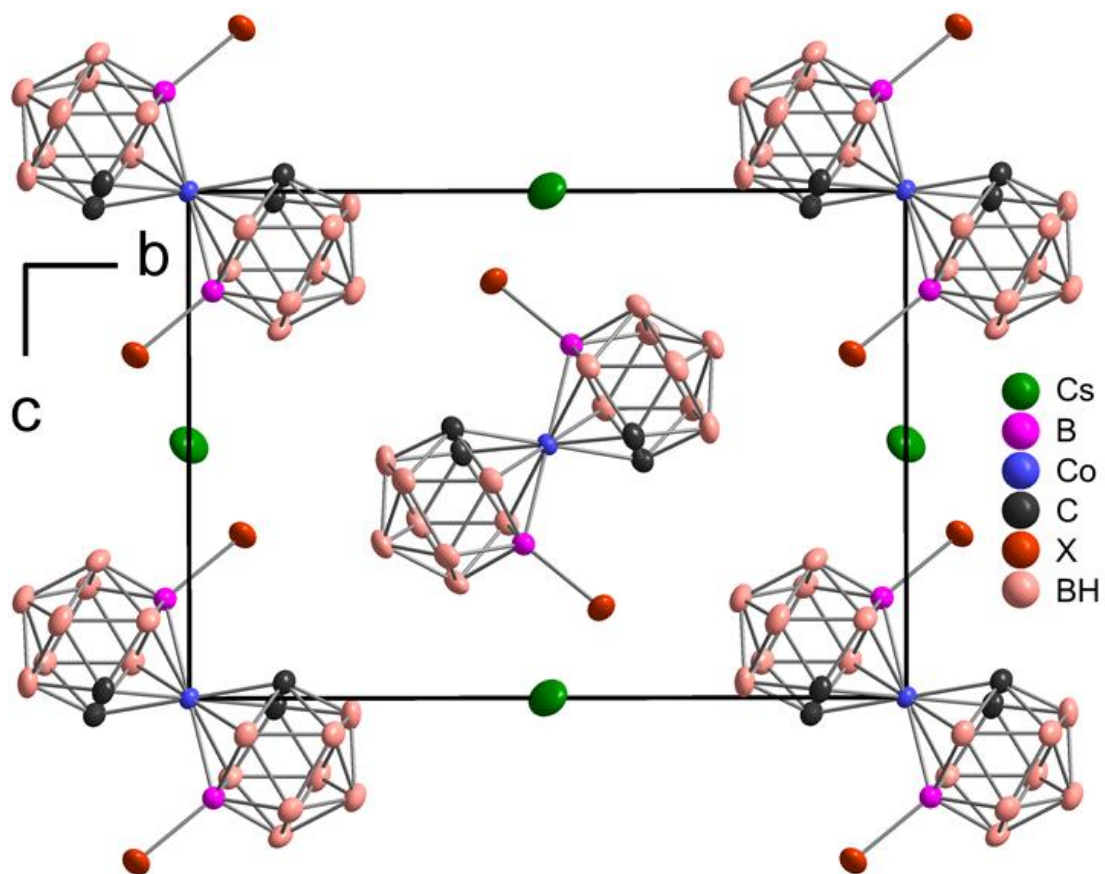

Fig. S94. Unit cell representation of  $\text{Cs}[\text{CoSAN-I,Br}]$  and  $\text{Cs}[\text{CoSAN-I,Cl}]$ , both in  $P2_1/n$ .

### 3. Summary of biological and physicochemical data

Tab. S2. Biological and physicochemical properties of synthesized compounds. MIC - minimum inhibitory concentration, MBC - minimum bactericidal concentration, Van – vancomycin, Pol - polymyxin B, IC<sub>50</sub> – half maximal inhibitory concentration of proliferation, MCF 10A – human mammary gland cells, HEK293 – human embryonic kidney cells, A549 – human lung cancer cells, MCF-7 – human breast cancer, SI *S. a.* – selectivity index calculated as IC<sub>50 MCF 10A</sub>/MIC<sub>*S. aureus*</sub>, SI *E. f.* – selectivity index calculated as IC<sub>50 MCF 10A</sub>/MIC<sub>*E. faecium*</sub>, Log P – decimal logarithm of partition coefficient, Log k<sub>w</sub> – decimal logarithm of chromatographic lipophilicity index, SE – standard error, “-” not determined.

| Compound                   | <i>S. aureus</i><br>ATCC 6538 |             | <i>E. faecium</i><br>PCM 2910 |             | <i>E. coli</i><br>PCM 2720 |             | <i>P. aeruginosa</i><br>PCM 1630 |             | IC <sub>50</sub> (95% CI)<br>[μM] |                        |                        |                        | SI <i>S. a.</i><br>[-] | SI <i>E. f.</i><br>[-] | Log P<br>(SE)<br>[-] | Log k <sub>w</sub><br>(SE)<br>[-] |
|----------------------------|-------------------------------|-------------|-------------------------------|-------------|----------------------------|-------------|----------------------------------|-------------|-----------------------------------|------------------------|------------------------|------------------------|------------------------|------------------------|----------------------|-----------------------------------|
|                            | MIC<br>[μM]                   | MBC<br>[μM] | MIC<br>[μM]                   | MBC<br>[μM] | MIC<br>[μM]                | MBC<br>[μM] | MIC<br>[μM]                      | MBC<br>[μM] | MCF 10A                           | HEK293                 | A549                   | MCF-7                  |                        |                        |                      |                                   |
| Na[CoSAN]                  | 50                            | 100         | 25                            | 50          | >100                       | >100        | >100                             | >100        | 34.94<br>(-)                      | 20.84<br>(33.43-50.87) | 24.61<br>(20.21-29.67) | 75.53<br>(56.18-189.6) | 0.70                   | 1.40                   | 1.59<br>(0.01)       | 3.26<br>(0.01)                    |
| Na[CoSAN-F <sub>2</sub> ]  | 25                            | 50          | 50                            | 100         | >100                       | >100        | >100                             | >100        | 33.91<br>(-)                      | 28.94<br>(24.49-34.28) | 16.57<br>(14.44-19.00) | 44.52<br>(37.54-53.74) | 1.36                   | 0.68                   | 1.30<br>(0.01)       | 3.06<br>(0.02)                    |
| Na[CoSAN-Cl <sub>2</sub> ] | 12.5                          | 25          | 12.5                          | 25          | >100                       | >100        | >100                             | >100        | 25.44<br>(20.99-29.93)            | 22.25<br>(19.34-25.53) | 13.58<br>(11.84-15.56) | 35.03<br>(27.26-45.60) | 2.04                   | 2.04                   | 3.17<br>(0.02)       | 4.11<br>(0.02)                    |
| Na[CoSAN-Br <sub>2</sub> ] | 3.1                           | 6.2         | 6.2                           | 12.5        | >100                       | >100        | >100                             | >100        | 23.93<br>(19.59-28.42)            | 22.56<br>(18.15-28.06) | 12.86<br>(11.60-14.37) | 33.78<br>(28.27-39.71) | 7.72                   | 3.86                   | 3.65<br>(0.03)       | 4.33<br>(0.02)                    |
| Na[CoSAN-I <sub>2</sub> ]  | 1.6                           | 3.1         | 1.6                           | 12.5        | >100                       | >100        | >100                             | >100        | 17.47<br>(14.64-20.86)            | 17.78<br>(15.67-20.16) | 11.29<br>(10.13-12.72) | 24.64<br>(20.17-29.60) | 10.92                  | 10.92                  | 4.23<br>(0.04)       | 4.68<br>(0.03)                    |
| Na[CoSAN-Cl]               | 12.5                          | 25          | 12.5                          | 25          | >100                       | >100        | >100                             | >100        | 32.67<br>(-)                      | 29.43<br>(24.12-37.02) | 16.17<br>(13.68-19.07) | 51.39<br>(43.28-62.42) | 2.61                   | 2.61                   | 2.15<br>(0.01)       | 3.60<br>(0.02)                    |
| Na[CoSAN-Br]               | 3.1                           | 6.2         | 6.2                           | 25          | >100                       | >100        | >100                             | >100        | 31.66<br>(-)                      | 26.59<br>(22.16-32.28) | 15.91<br>(13.96-18.12) | 41.69<br>(35.64-49.61) | 10.21                  | 5.11                   | 2.40<br>(0.02)       | 3.75<br>(0.03)                    |
| Na[CoSAN-I]                | 0.8                           | 1.6         | 1.6                           | 12.5        | >100                       | >100        | >100                             | >100        | 31.28<br>(25.92-35.19)            | 20.84<br>(16.63-26.31) | 12.82<br>(11.20-14.68) | 36.57<br>(32.57-41.52) | 39.10                  | 19.55                  | 2.79<br>(0.01)       | 3.96<br>(0.02)                    |
| Na[CoSAN-Br,Cl]            | 6.2                           | 12.5        | 12.5                          | 25          | >100                       | >100        | >100                             | >100        | 29.41<br>(24.27-32.85)            | 23.74<br>(20.48-27.45) | 12.36<br>(10.91-13.99) | 36.49<br>(30.12-43.57) | 4.74                   | 2.35                   | 3.33<br>(0.02)       | 4.23<br>(0.02)                    |
| Na[CoSAN-I,Br]             | 1.6                           | 3.1         | 6.2                           | 12.5        | >100                       | >100        | >100                             | >100        | 20.65<br>(16.82-25.06)            | 25.67<br>(21.10-30.60) | 11.87<br>(-)           | 34.92<br>(27.58-42.39) | 12.91                  | 3.33                   | 4.12<br>(0.03)       | 4.53<br>(0.03)                    |
| Na[CoSAN-I,Cl]             | 1.6                           | 3.1         | 6.2                           | 12.5        | 100                        | >100        | >100                             | >100        | 11.15<br>(-)                      | 11.66<br>(10.22-13.26) | 8.45<br>(7.28-9.60)    | 16.89<br>(13.77-20.56) | 6.97                   | 1.80                   | 3.78<br>(0.03)       | 4.42<br>(0.03)                    |
| Van                        | <0.4                          | 0.4         | <0.4                          | 50/<br>100  | -                          | -           | -                                | -           | -                                 | -                      | -                      | -                      | -                      | -                      | -                    | -                                 |
| Pol                        | -                             | -           | -                             | -           | 0.8                        | 1.6         | 1.6                              | 1.6         | -                                 | -                      | -                      | -                      | -                      | -                      | -                    | -                                 |

Table S3. HPLC quantitative analysis of synthesized compounds.

| Compound                    | Mw<br>(g/mol) | c<br>(mg/ml) | c<br>(mM) | HPLC - R <sub>t</sub><br>(min) | HPLC - λ <sub>max</sub><br>(nm) | HPLC<br>Peak area (mAU×min) | Precision<br>(%) |
|-----------------------------|---------------|--------------|-----------|--------------------------------|---------------------------------|-----------------------------|------------------|
| Na[CoSAN]×4H <sub>2</sub> O | 418.80        | 41.88        | 100       | 12.526                         | 283                             | 22.3298                     | 101              |
| Cs[CoSAN]                   | 465.65        | 45.67        |           | 12.530                         |                                 | 22.1530                     |                  |
| Na[CoSAN-F <sub>2</sub> ]   | 382.72        | 38.27        | 100       | 12.088                         | 298                             | 14.4292                     | 103              |
| H[CoSAN-F <sub>2</sub> ]    | 360.74        | 36.07        |           | 12.086                         |                                 | 14.8004                     |                  |
| Na[CoSAN-Cl <sub>2</sub> ]  | 415.63        | 41.56        | 100       | 14.531                         | 316                             | 21.2860                     | 102              |
| Cs[CoSAN-Cl <sub>2</sub> ]  | 525.54        | 52.55        |           | 14.524                         |                                 | 20.8399                     |                  |
| Na[CoSAN-Br <sub>2</sub> ]  | 504.53        | 50.45        | 100       | 15.043                         | 321                             | 19.9212                     | 96.1             |
| Cs[CoSAN-Br <sub>2</sub> ]  | 614.44        | 61.44        |           | 15.035                         |                                 | 20.7320                     |                  |
| Na[CoSAN-I <sub>2</sub> ]   | 598.53        | 59.85        | 100       | 15.766                         | 290                             | 10.7511                     | 95.4             |
| Cs[CoSAN-I <sub>2</sub> ]   | 708.45        | 70.85        |           | 15.768                         |                                 | 11.2657                     |                  |
| Na[CoSAN-Cl]                | 381.18        | 38.12        | 100       | 13.405                         | 306                             | 21.7939                     | 94.6             |
| Cs[CoSAN-Cl]                | 491.10        | 49.11        |           | 13.403                         |                                 | 23.0441                     |                  |
| Na[CoSAN-Br]                | 425.63        | 42.56        | 100       | 13.742                         | 311                             | 19.6381                     | 94.6             |
| Cs[CoSAN-Br]                | 535.55        | 53.56        |           | 13.738                         |                                 | 20.7516                     |                  |
| Na[CoSAN-I]                 | 472.63        | 47.26        | 100       | 14.127                         | 290                             | 12.1121                     | 101              |
| Cs[CoSAN-I]                 | 582.55        | 58.26        |           | 14.126                         |                                 | 12.0087                     |                  |
| Na[CoSAN-Br,Cl]             | 460.08        | 46.01        | 100       | 14.779                         | 319                             | 20.6934                     | 95.5             |
| Cs[CoSAN-Br,Cl]             | 569.99        | 57.00        |           | 14.775                         |                                 | 21.6588                     |                  |
| Na[CoSAN-I,Br]              | 551.53        | 55.15        | 100       | 15.413                         | 324                             | 12.4771                     | 95.8             |
| Cs[CoSAN-I,Br]              | 661.45        | 66.15        |           | 15.411                         |                                 | 13.0222                     |                  |
| Na[CoSAN-I,Cl]              | 507.08        | 50.71        | 100       | 14.941                         | 319                             | 10.3553                     | 101              |
| Cs[CoSAN-I,Cl]              | 617.00        | 61.70        |           | 14.943                         |                                 | 10.2554                     |                  |

#### 4. Antiproliferative activity

##### 4.1 IC<sub>50</sub> comparison for tested cell lines

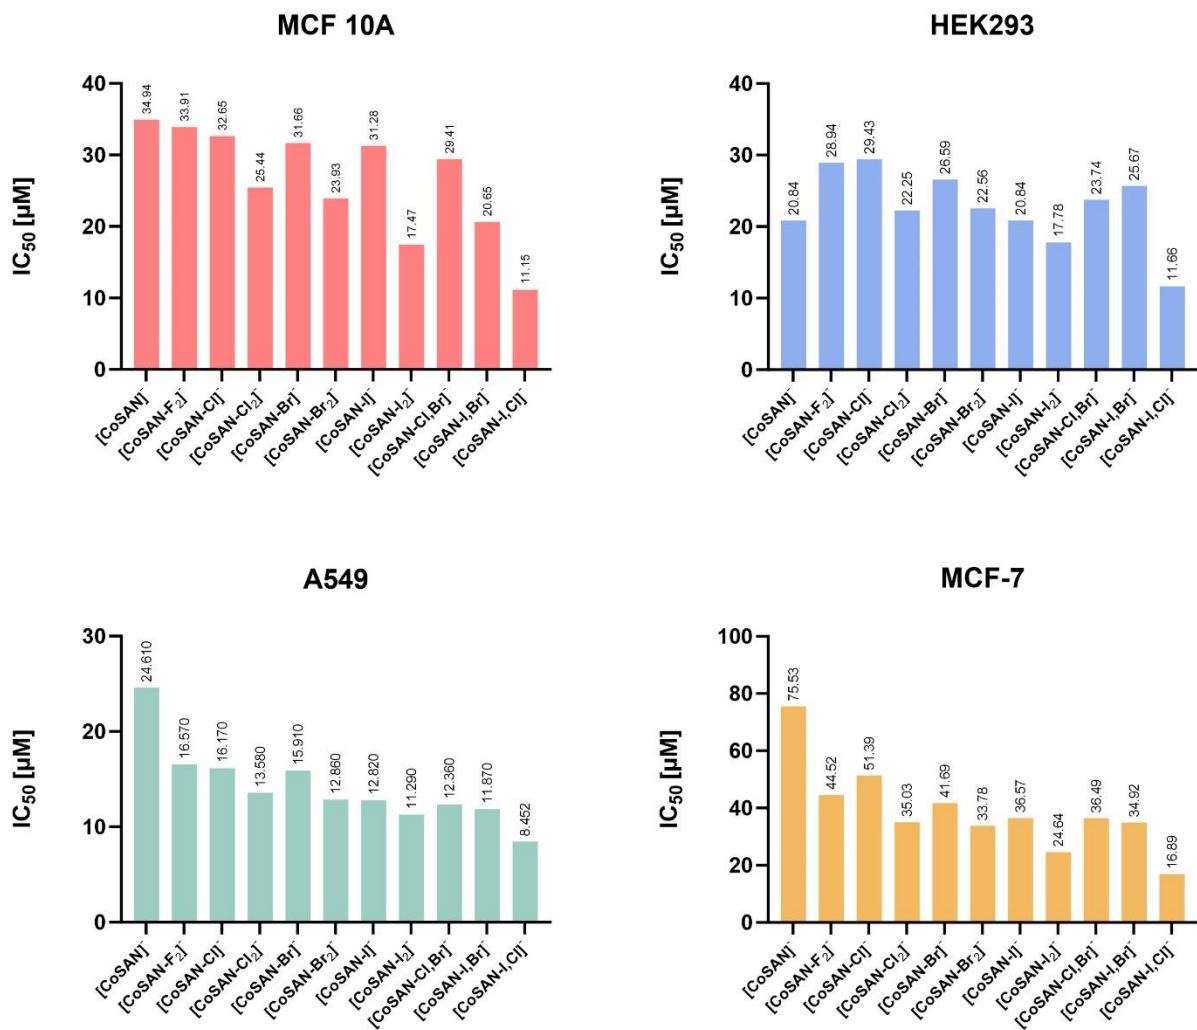

Fig. S95. IC<sub>50</sub> comparison graphs across MCF 10A (epithelial human mammary gland cell line), HEK293 (epithelial human embryonic kidney cell line), A549 (epithelial human lung adenocarcinoma) and MCF-7 (epithelial human breast adenocarcinoma).

4.2 Dose-response curve for Na[CoSAN]

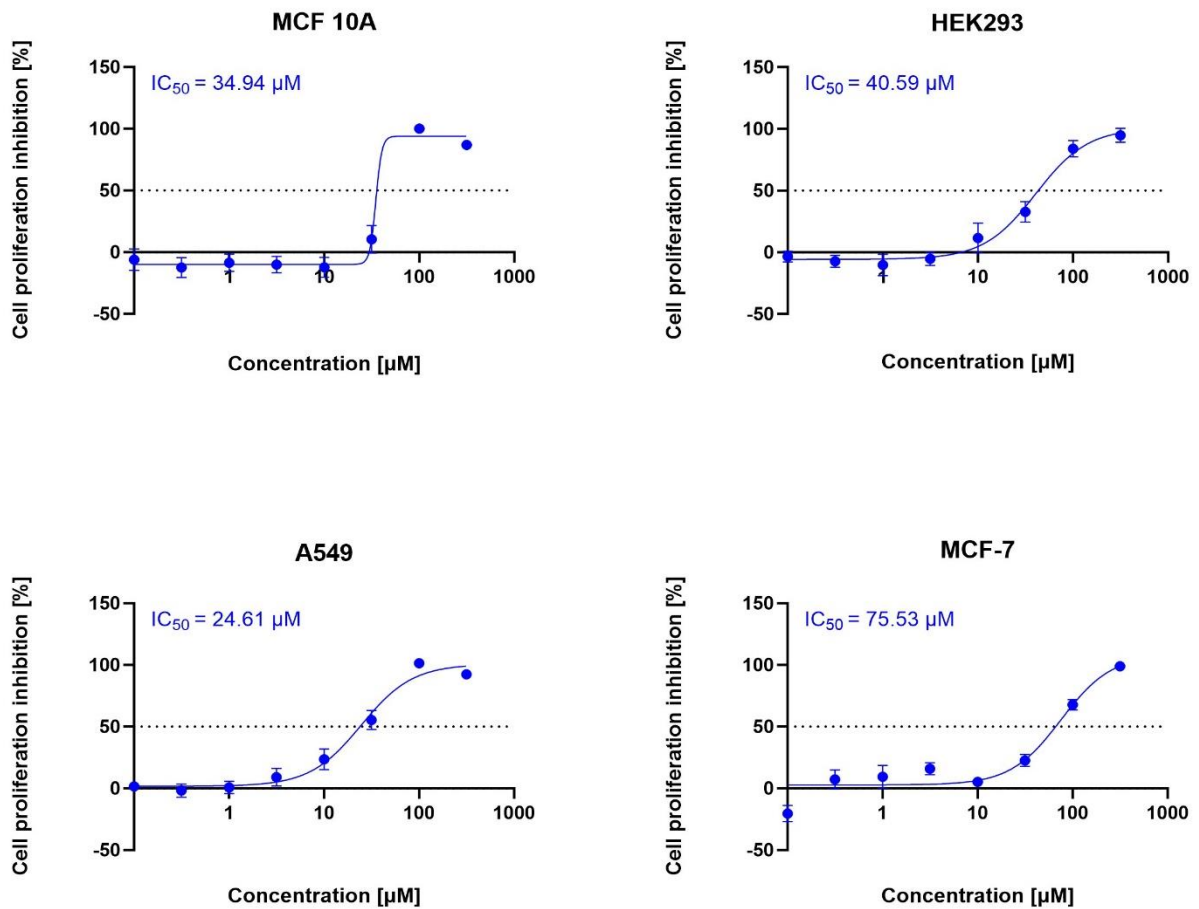

|         | 95% CI [µM]    |
|---------|----------------|
| MCF 10A | -              |
| HEK293  | 33.43 to 50.87 |
| A549    | 20.21 to 29.67 |
| MCF-7   | 56.18 to 189.6 |

Fig. S96. Antiproliferative activity of Na[CoSAN] against MCF 10A (epithelial human mammary gland cell line), HEK293 (epithelial human embryonic kidney cell line), A549 (epithelial human lung adenocarcinoma) and MCF-7 (epithelial human breast adenocarcinoma) - 72-hour dose-response curve. The table contains 95% confidence intervals.



### 4.3 Dose-response curve for Na[CoSAN-F<sub>2</sub>]

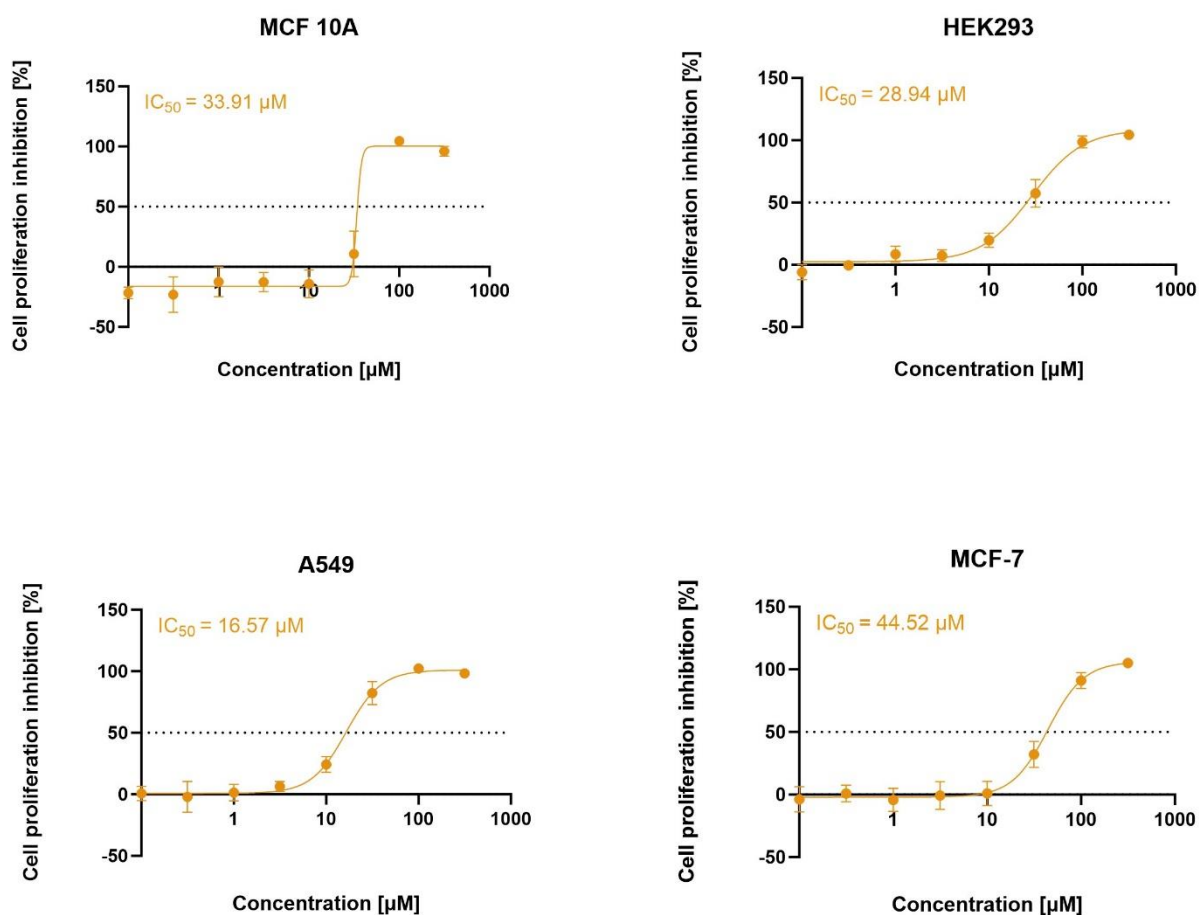

|         | 95% CI [μM]    |
|---------|----------------|
| MCF 10A | -              |
| HEK293  | 24.49 to 34.28 |
| A549    | 14.44 to 19.00 |
| MCF-7   | 37.54 to 53.74 |

Fig. S97. Antiproliferative activity of Na[CoSAN-F<sub>2</sub>] against MCF 10A (epithelial human mammary gland cell line), HEK293 (epithelial human embryonic kidney cell line), A549 (epithelial human lung adenocarcinoma) and MCF-7 (epithelial human breast adenocarcinoma) - 72-hour dose-response curve. The table contains 95% confidence intervals.

#### 4.4 Dose-response curve for Na[CoSAN-Cl<sub>2</sub>]

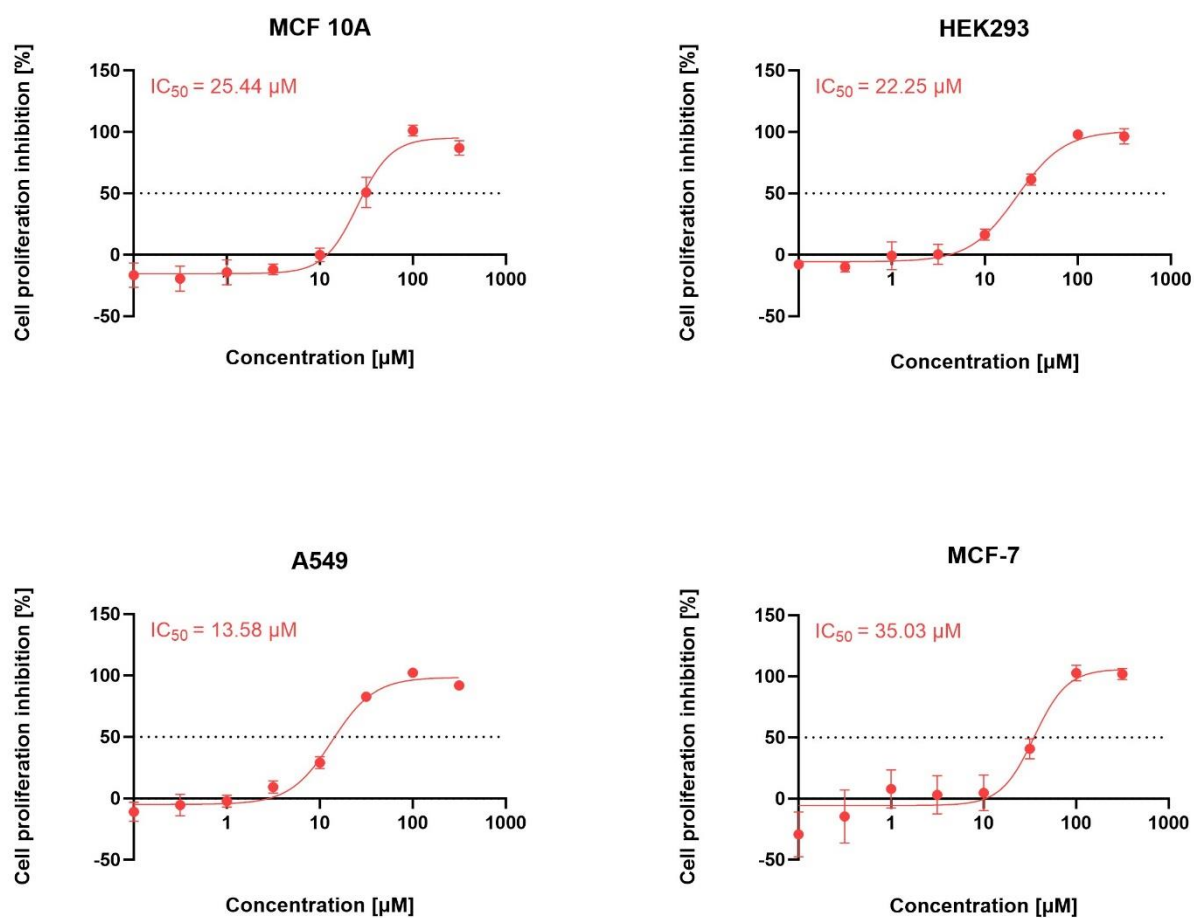

|         | 95% CI [μM]    |
|---------|----------------|
| MCF 10A | 20.99 to 29.93 |
| HEK293  | 19.34 to 25.53 |
| A549    | 11.84 to 15.56 |
| MCF-7   | 27.26 to 45.60 |

Fig. S98. Antiproliferative activity of Na[CoSAN-Cl<sub>2</sub>] against MCF 10A (epithelial human mammary gland cell line), HEK293 (epithelial human embryonic kidney cell line), A549 (epithelial human lung adenocarcinoma) and MCF-7 (epithelial human breast adenocarcinoma) - 72-hour dose-response curve. The table contains 95% confidence intervals.

#### 4.5 Dose-response curve for Na[CoSAN-Br<sub>2</sub>]

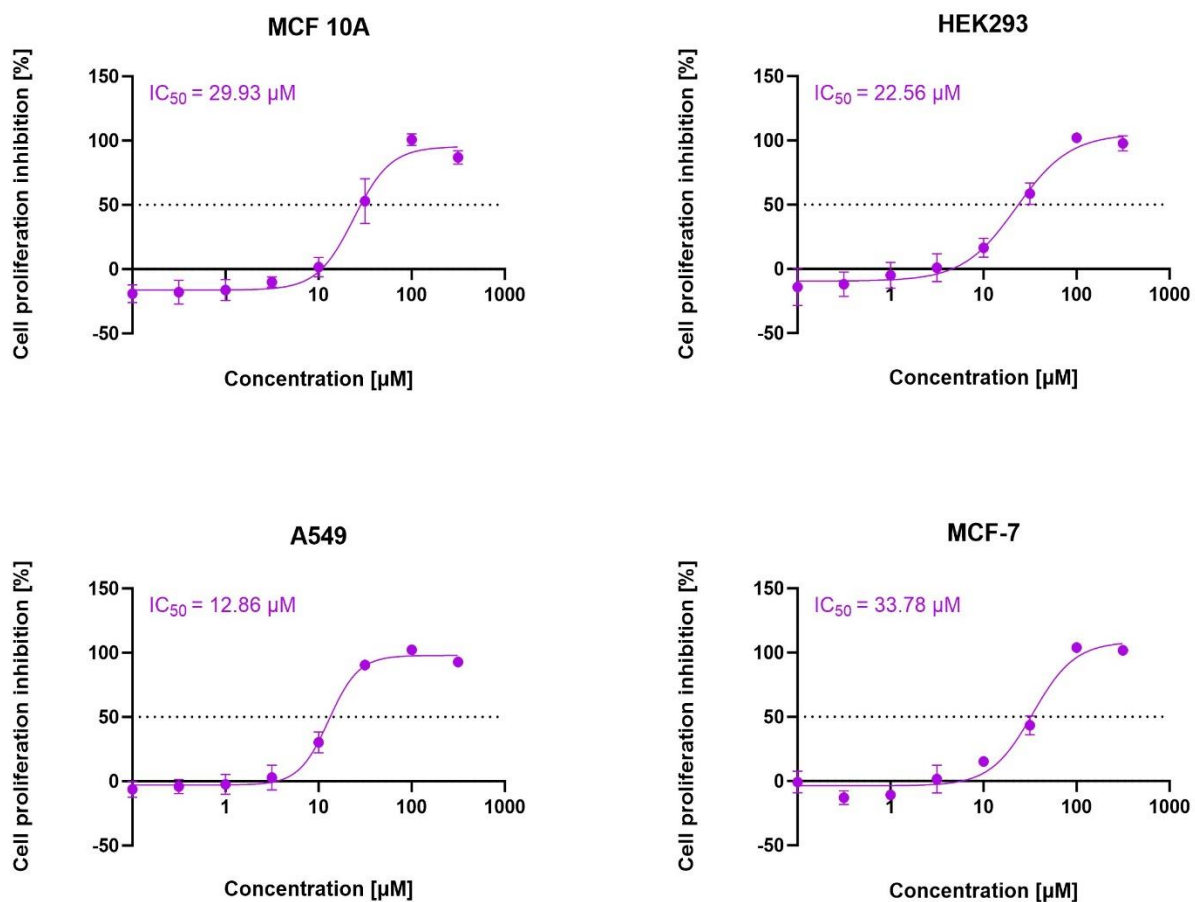

|         | 95% CI [μM]    |
|---------|----------------|
| MCF 10A | 19.59 to 28.42 |
| HEK293  | 18.15 to 28.06 |
| A549    | 11.60 to 14.37 |
| MCF-7   | 28.27 to 39.71 |

Fig. S99. Antiproliferative activity of Na[CoSAN-Br<sub>2</sub>] against MCF 10A (epithelial human mammary gland cell line), HEK293 (epithelial human embryonic kidney cell line), A549 (epithelial human lung adenocarcinoma) and MCF-7 (epithelial human breast adenocarcinoma) - 72-hour dose-response curve. The table contains 95% confidence intervals.

4.6 Dose-response curve for Na[CoSAN-I<sub>2</sub>]

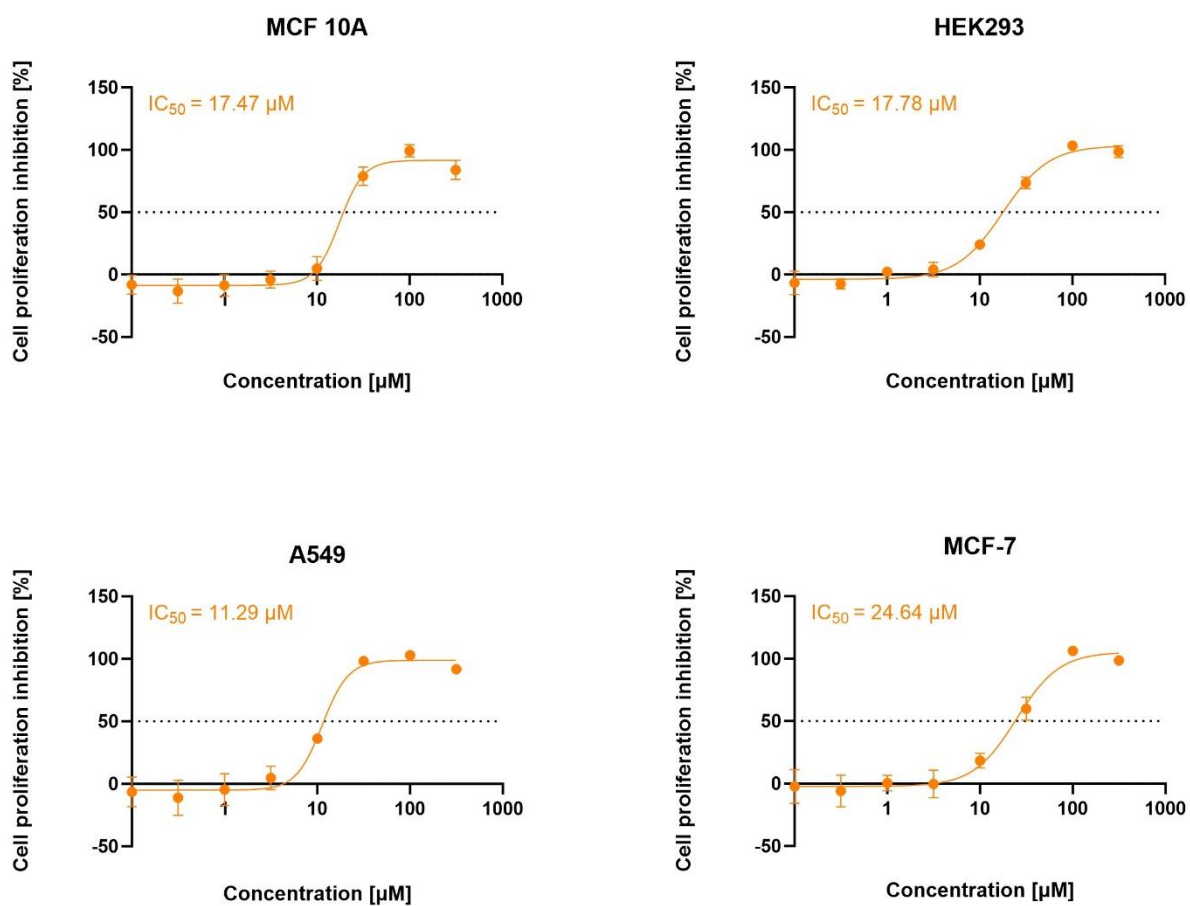

|         | 95% CI [μM]    |
|---------|----------------|
| MCF 10A | 14.64 to 20.86 |
| HEK293  | 15.67 to 20.16 |
| A549    | 10.13 to 12.72 |
| MCF-7   | 20.17 to 29.60 |

Fig. S100. Antiproliferative activity of Na[CoSAN-I<sub>2</sub>] against MCF 10A (epithelial human mammary gland cell line), HEK293 (epithelial human embryonic kidney cell line), A549 (epithelial human lung adenocarcinoma) and MCF-7 (epithelial human breast adenocarcinoma) - 72-hour dose-response curve. The table contains 95% confidence intervals.

4.7 Dose-response curve for Na[CoSAN-Cl]

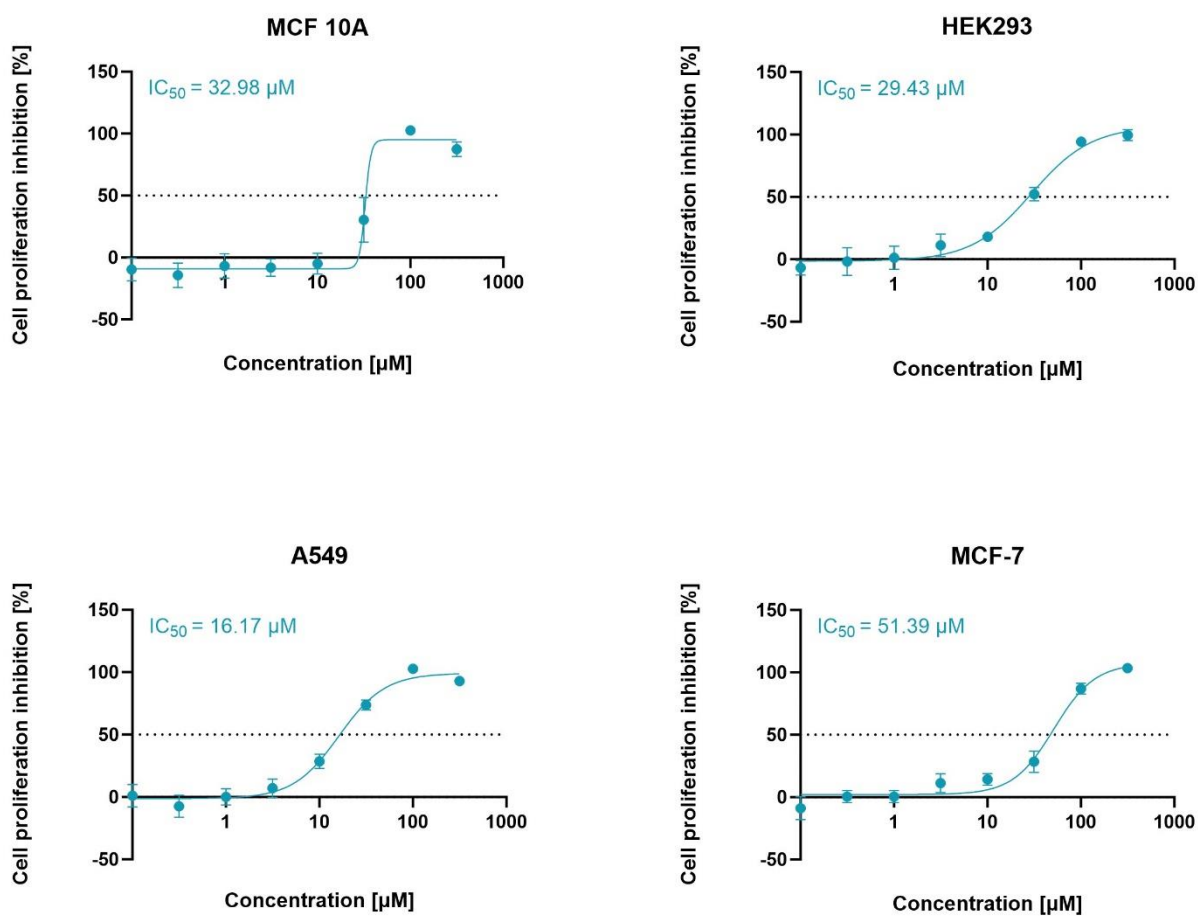

|         | 95% CI [µM]    |
|---------|----------------|
| MCF 10A | -              |
| HEK293  | 24.12 to 37.02 |
| A549    | 13.68 to 19.07 |
| MCF-7   | 43.28 to 62.42 |

Fig. S101. Antiproliferative activity of Na[CoSAN-Cl] against MCF 10A (epithelial human mammary gland cell line), HEK293 (epithelial human embryonic kidney cell line), A549 (epithelial human lung adenocarcinoma) and MCF-7 (epithelial human breast adenocarcinoma) - 72-hour dose-response curve. The table contains 95% confidence intervals.

4.8 Dose-response curve for Na[CoSAN-Br]

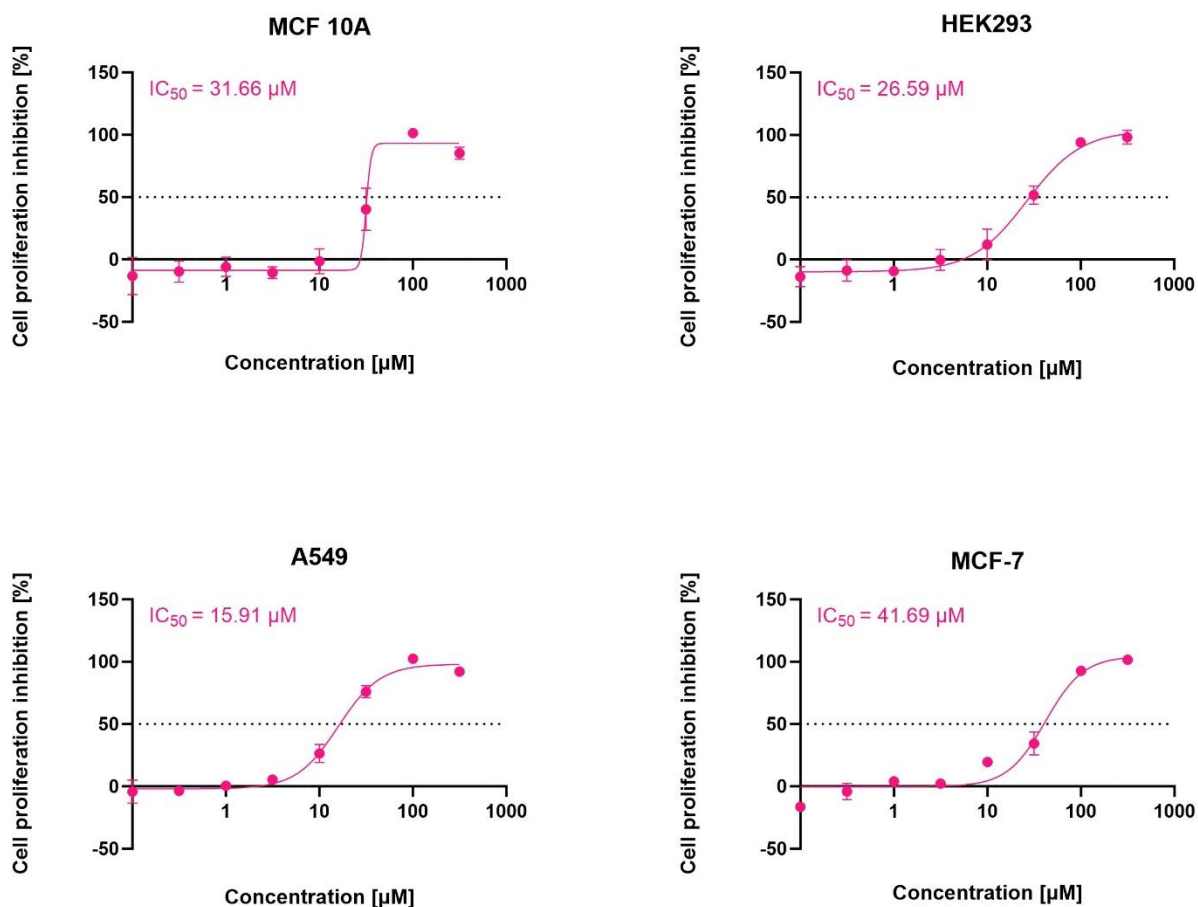

|         | 95% CI [µM]    |
|---------|----------------|
| MCF 10A | -              |
| HEK293  | 22.16 to 32.28 |
| A549    | 13.96 to 18.12 |
| MCF-7   | 35.64 to 49.61 |

Fig. S102. Antiproliferative activity of Na[CoSAN-Br] against MCF 10A (epithelial human mammary gland cell line), HEK293 (epithelial human embryonic kidney cell line), A549 (epithelial human lung adenocarcinoma) and MCF-7 (epithelial human breast adenocarcinoma) - 72-hour dose-response curve. The table contains 95% confidence intervals.

4.9 Dose-response curve for Na[CoSAN-I]

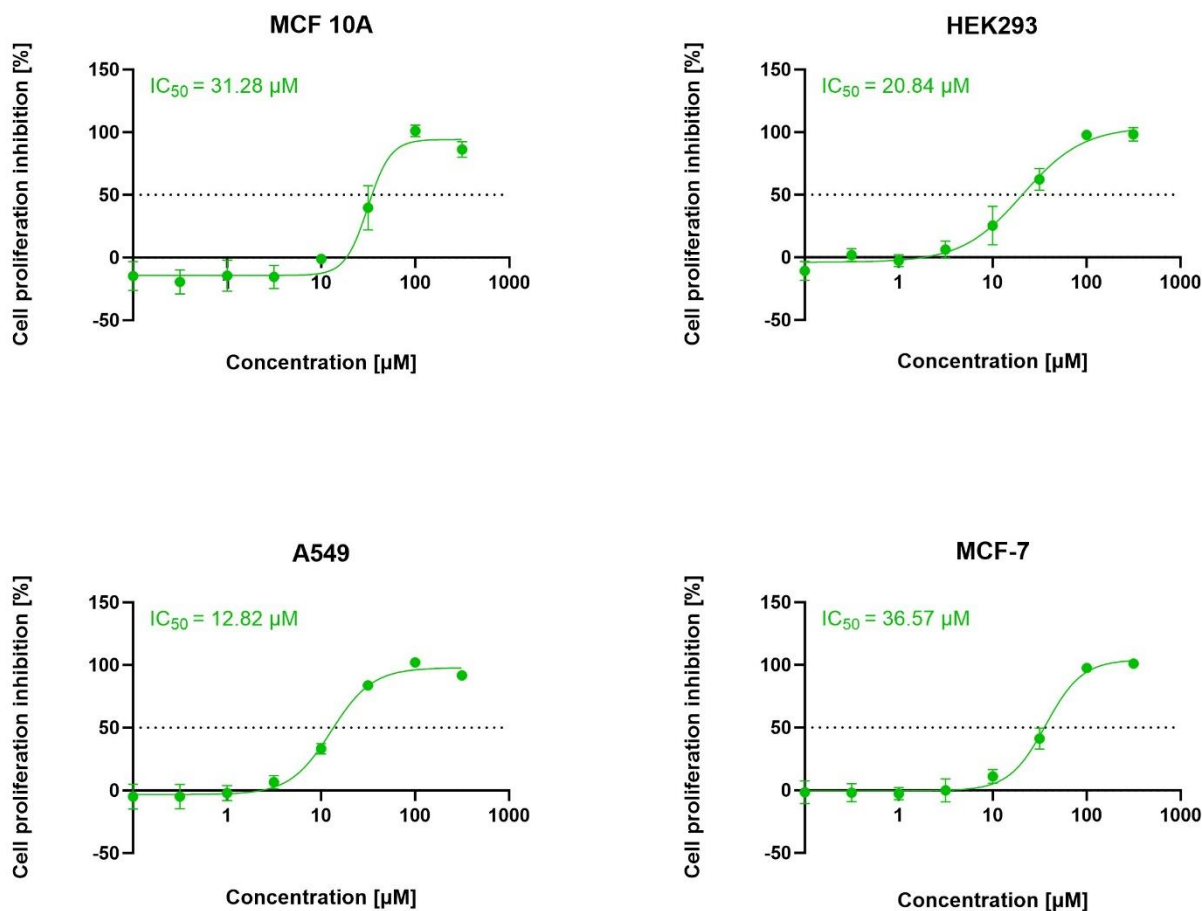

|         | 95% CI [µM]    |
|---------|----------------|
| MCF 10A | 25.92 to 35.19 |
| HEK293  | 16.63 to 26.31 |
| A549    | 11.20 to 14.68 |
| MCF-7   | 32.57 to 41.52 |

Fig. S103. Antiproliferative activity of Na[CoSAN-I] against MCF 10A (epithelial human mammary gland cell line), HEK293 (epithelial human embryonic kidney cell line), A549 (epithelial human lung adenocarcinoma) and MCF-7 (epithelial human breast adenocarcinoma) - 72-hour dose-response curve. The table contains 95% confidence intervals.

#### 4.10 Dose-response curve for Na[CoSAN-Cl,Br]

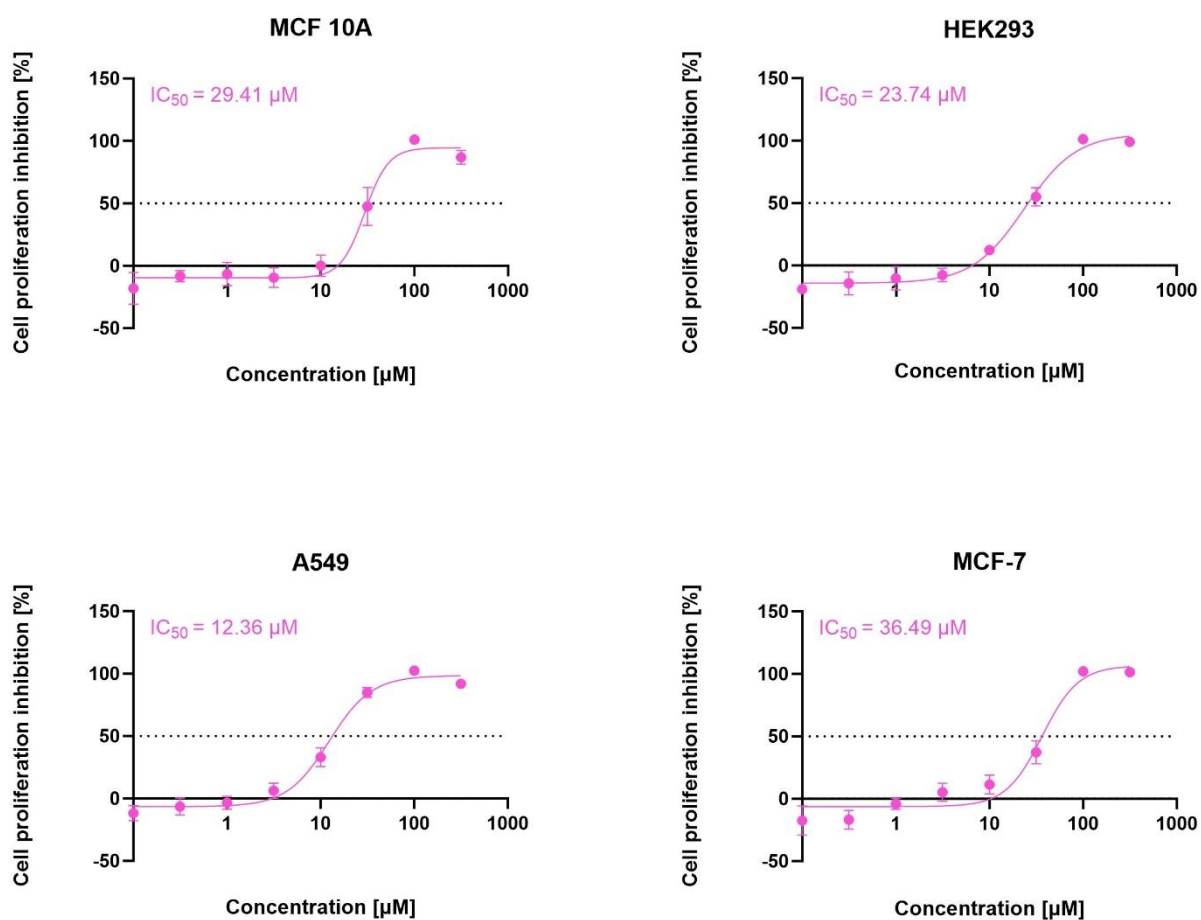

|         | 95% CI [µM]    |
|---------|----------------|
| MCF 10A | 24.27 to 32.85 |
| HEK293  | 20.48 to 27.45 |
| A549    | 10.91 to 13.99 |
| MCF-7   | 30.12 to 43.57 |

Fig. S104. Antiproliferative activity of Na[CoSAN-Cl,Br] against MCF 10A (epithelial human mammary gland cell line), HEK293 (epithelial human embryonic kidney cell line), A549 (epithelial human lung adenocarcinoma) and MCF-7 (epithelial human breast adenocarcinoma) - 72-hour dose-response curve. The table contains 95% confidence intervals.



#### 4.11 Dose-response curve for Na[CoSAN-I,Br]

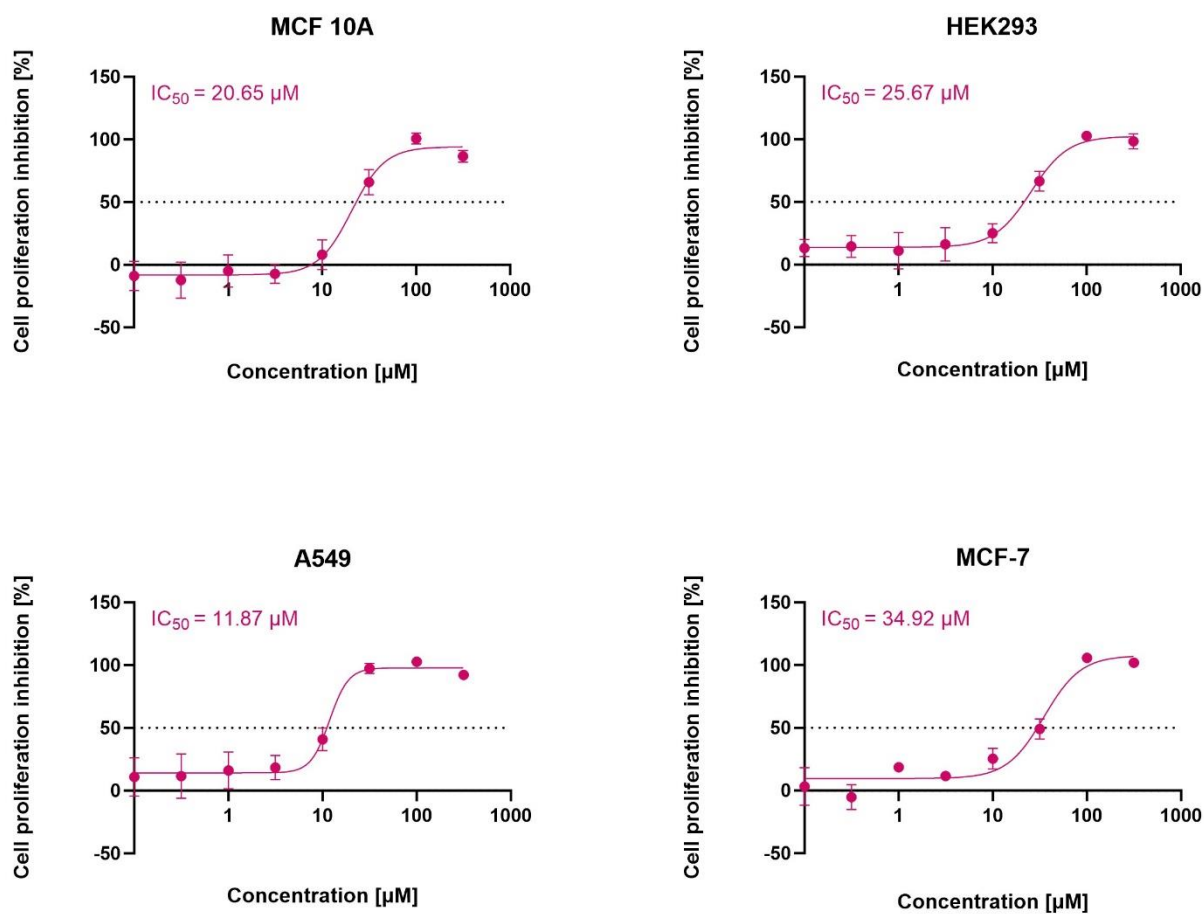

|         | 95% CI [µM]    |
|---------|----------------|
| MCF 10A | 16.82 to 25.06 |
| HEK293  | 21.10 to 30.60 |
| A549    | -              |
| MCF-7   | 27.58 to 42.39 |

Fig. S105. Antiproliferative activity of Na[CoSAN-I,Br] against MCF 10A (epithelial human mammary gland cell line), HEK293 (epithelial human embryonic kidney cell line), A549 (epithelial human lung adenocarcinoma) and MCF-7 (epithelial human breast adenocarcinoma) - 72-hour dose-response curve. The table contains 95% confidence intervals.

4.12 Dose-response curve for Na[CoSAN-I,Cl]

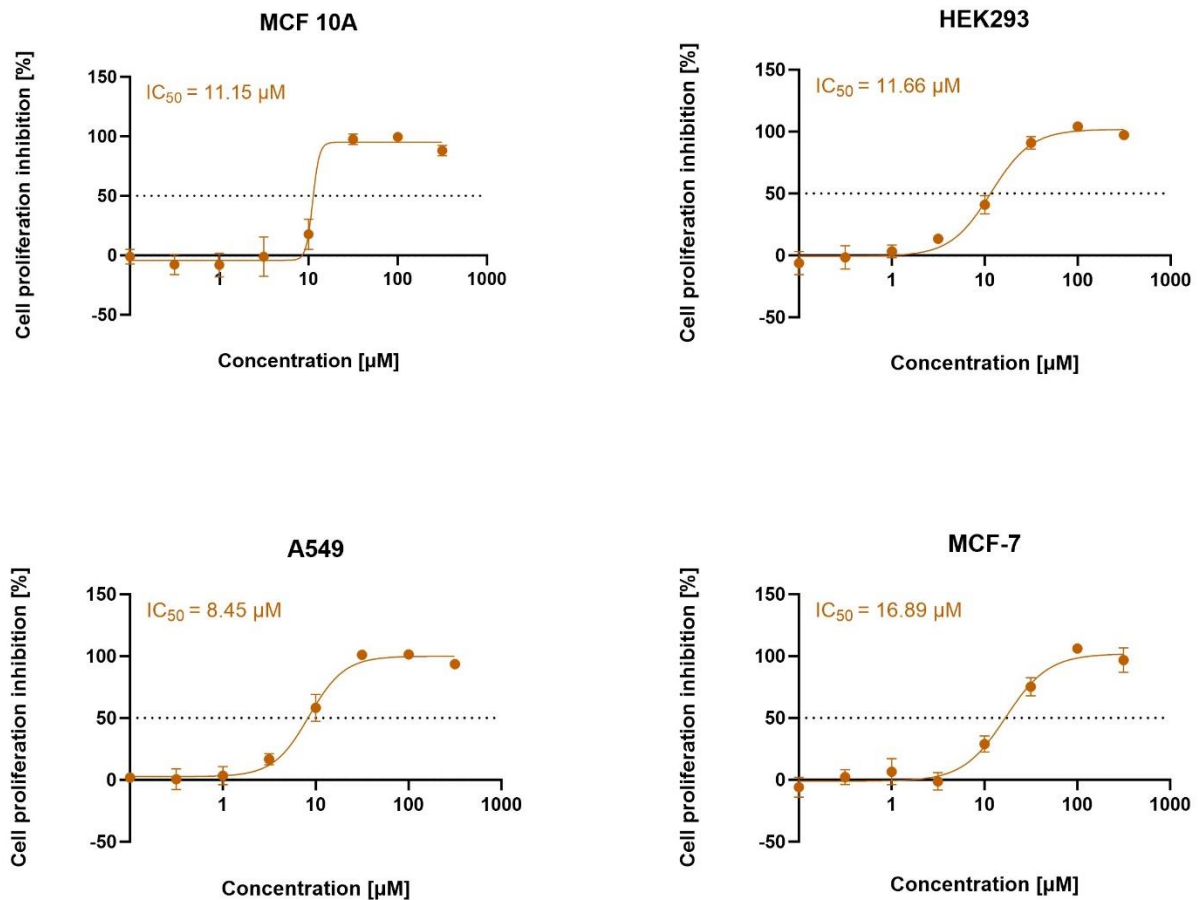

|         | 95% CI [µM]    |
|---------|----------------|
| MCF 10A | -              |
| HEK293  | 10.22 to 13.26 |
| A549    | 7.28 to 9.60   |
| MCF-7   | 13.77 to 20.56 |

Fig. S106. Antiproliferative activity of Na[CoSAN-I,Cl] against MCF 10A (epithelial human mammary gland cell line), HEK293 (epithelial human embryonic kidney cell line), A549 (epithelial human lung adenocarcinoma) and MCF-7 (epithelial human breast adenocarcinoma) - 72-hour dose-response curve. The table contains 95% confidence intervals.
